# Supplementary material for: Validation of the Chemical and Biological Steps Required Implementing an Advanced Multi-Omics Approach for Assessing the Fate and Impact of Contaminants in Lagoon Sediments
Source: Preprints.org preprint supplement (doi:10.20944/preprints202406.1474.v1), 2024-06-21
Supplement: Supplementary file 1 [file supplementary]

## Sheet: SI1
Table SI1. Labelled internal standards used for extraction
acetaminophen-d3
diuron-d6
carbamazepine-d10
sulfamethoxazole-d4
carbendazim-d4
atrazine-d5
imidacloprid-d4
venlafaxin-d6
oxazepam-d5
diclofenac-d4
boscalid-d4
amisulpirid-d4
flecainid-d4
valsartan-d8
Citalopram-d4
Tebuconazole-d9

## Sheet: SI2
Table SI2. Compounds used as quality control for LC-QToF screening
Analyte	m/z exp.	m/z meas.	Δm/z [ppm]	RT [min] exp.	RT [min]	ΔRT [min]
Acetamiprid	223.075	223.074	-1.39	5	5	0
Amantadine	152.143	152.143	-2.13	4.97	4.97	0
Amisulpride	370.18	370.18	0.23	4.24	4.24	0
Atenolol	267.17	267.17	0.18	3.78	3.78	0
Atorvastatin	559.26	559.26	-1.12	9.2	9.2	0
Atrazine	216.101	216.101	-2.58	7.25	7.25	0
Bitrex	325.227	325.227	-0.48	5.98	5.98	0
Carbamazepine	237.102	237.102	-1.99	6.69	6.69	0
Cetirizine	389.163	389.162	-1.5	7.92	7.92	0
Citalopram	325.171	325.171	-0.88	5.97	5.97	0
Clopidogrel	322.066	322.065	-2.42	10.56	10.56	0
DEET (Diethyltoluamide)	192.138	192.138	-2.44	7.36	7.36	0
Diclofenac	296.024	296.024	-0.73	9.38	9.38	0
Disopyramide	340.238	340.238	0.15	4.86	4.86	0
Diuron	233.024	233.024	-3.31	7.49	7.49	0
Fexofenadine	502.295	502.294	-1.54	6.96	6.96	0
Irbesartan	429.24	429.239	-1.44	8.24	8.24	0
Ketoprofen	255.102	255.1	-4.41	7.58	7.58	0
Rivaroxaban	436.073	436.072	-3.07	6.18	6.18	0
Sitagliptin	408.125	408.124	-2.37	5.06	5.06	0
Tiapride	329.153	329.153	-0.33	3.89	3.89	0

## Sheet: SI3
Table SI3. Compounds MRM transitions used for quantification with H-Class-Xevo-TQ-S
Name	RT	MRM T1 / T2	ratio	cone tension (V)	Collision energie (eV)
Acetaminophen	2.4	152,3 > 110,2	5.7	21	15
		152,3 > 93,1		21	19
Diuron	6	233,1 > 72,3	14.8	13	21
		233,1 > 160,0		13	25
Carbamazepine	5.6	237,2 > 194,1	9.1	5	17
		237,2 > 179,1		5	29
Sulfamethoxazole	3.6	254,1 > 92,3	1	5	29
		254,1 > 156,1		5	17
carbamazepine-d10	5.6	247,0 > 204,0		47	21
Acetaminophen -d3	2.4	155,0 > 111,0		25	17
Diuron-d6	6	238,9 > 77,9		41	17
Sulfamethoxazole-d4	3.6	258,0 > 95,9		50	29
Terbuthylazine Desethyl hydroxy	2.6	184,3 > 128,2	2.8	29	13
		184,3 > 86,2		29	23
Carbendazim	3.2	192,1 > 160,1	7.3	24	18
		192,1 > 132,1		24	28
Carbendazim-d4	3.2	196,2 > 164		60	20
Atrazine-2-Hydroxy	3.4	198,3 > 156,2	1.7	43	23
		198,3 > 86,3		43	23
Propazine-2-Hydroxy	4	212,2 > 128,2	1.1	23	23
		212,2 > 86,3		23	31
Terbuthylazine-2-Hydroxy	4	212,2 > 156,2	1.4	37	17
		212,2 > 86,3		37	25
Atrazine	5.9	216,1 > 174	3.1	29	18
		216,1 > 96,1		29	23
Atrazine-d5	5.9	221,2 > 179,1		60	20
Terbuthylazine	6.6	230 > 174	7.2	28	16
		230 > 96		28	28
Imidacloprid	3.8	256,1 > 175,1	1	20	19
		256,1 > 209,1		20	16
Imidacloprid-d4	3.8	260,2 > 179		60	15
Venlafaxin	4.4	278,2 > 58,3	1.8	7	15
		278,2 > 260,1		7	27
Venlafaxin-d6	4.4	284,2 > 265,9		60	15
Oxazepam	6	287,0 > 241,0	1.3	25	19
		287,0 > 268,9		25	15
Testosterone	6.6	289,2 > 97	1.4	38	22
		289,2 > 109		38	21
Oxazepam-d5	6	292 > 246		20	20
Diclofenac	7.1	296,0 > 214,0	1.8	9	37
		296,0 > 250,0		9	13
Diclofenac-d4	7.1	299,9 > 217,9		27	35

## Sheet: SI4
Table SI4. ASV table for the 5 kits tested and the 5 replicates. SFMag: Magbeads FastDNA kit; SFMP: FastDNA Spin Kit (MP Biodemicals); SFO: E.Z.N.A Soil DNA kit (Omega Biotek); SFQ: DNeasy PowerSoil Pro Qiagen kit; SFZYM: Quick-DNA Fecal/Soil Microbe kit (Zymo Research)
	SFMag1	SFMag2	SFMag3	SFMag4	SFMag5	SFMP1	SFMP2	SFMP3	SFMP4	SFMP5	SFO1	SFO2	SFO3	SFO4	SFO5	SFQ1	SFQ2	SFQ3	SFQ4	SFQ5	SFZYM1	SFZYM2	SFZYM3	SFZYM4	SFZYM5
ASV_1	0	0	0	0	0	0	0	0	0	0	0	0	0	0	0	25	0	20	0	18	1480	2752	4296	2732	4960
ASV_2	0	0	0	0	0	0	0	0	0	0	0	0	0	0	0	20	30	7	12	0	1128	1997	4374	1773	3936
ASV_3	0	0	0	0	0	0	18	0	0	0	5	3	0	6	3	383	301	164	274	257	400	627	1604	805	1042
ASV_4	372	322	295	372	351	204	415	283	279	364	139	156	195	145	220	162	88	103	206	166	73	175	163	158	189
ASV_5	0	0	0	3	0	0	8	0	0	0	0	6	0	6	5	354	485	192	344	309	368	604	1170	395	1107
ASV_6	133	174	136	131	149	86	172	143	127	133	197	309	306	236	252	273	197	131	105	122	66	242	150	75	182
ASV_7	251	281	254	237	321	141	280	234	219	232	209	296	317	259	239	9	14	19	21	43	0	0	0	49	0
ASV_8	214	178	171	150	180	125	216	154	120	145	83	147	139	98	130	98	50	42	43	67	55	17	0	18	0
ASV_9	0	0	0	0	0	0	129	0	0	0	0	0	0	3	7	302	410	221	161	118	212	158	511	156	121
ASV_10	73	73	66	74	92	61	92	68	58	42	114	147	124	118	148	122	208	97	190	77	94	100	38	58	130
ASV_11	4	0	0	2	0	4	3	0	0	0	0	4	0	0	0	162	32	145	76	109	277	375	423	117	526
ASV_12	154	159	166	173	249	73	174	212	139	153	100	128	117	75	93	0	0	0	0	17	0	0	0	25	9
ASV_13	28	25	29	19	18	13	12	0	0	15	15	15	14	15	11	46	0	19	50	36	276	312	301	204	522
ASV_14	108	151	106	169	143	84	136	125	70	152	36	50	56	39	59	30	26	18	74	12	0	65	0	0	40
ASV_15	41	23	36	27	38	15	17	8	21	23	32	40	35	25	41	116	156	71	91	152	162	134	0	99	285
ASV_16	0	0	0	0	0	0	0	0	0	0	0	0	0	0	0	0	0	0	0	0	24	0	1611	0	0
ASV_17	0	0	0	0	0	0	0	0	0	0	0	0	0	0	0	0	0	17	723	139	0	0	0	304	411
ASV_18	63	62	66	49	82	40	87	77	50	56	66	93	63	64	90	57	34	40	85	31	16	15	80	22	0
ASV_19	20	32	24	29	29	14	28	16	14	35	53	82	62	56	66	153	112	115	113	71	27	49	46	101	17
ASV_20	30	39	32	36	44	29	36	43	29	38	33	54	50	45	56	78	77	48	153	163	16	21	0	29	114
ASV_21	0	0	0	0	0	0	0	0	0	0	0	0	0	0	0	33	0	13	687	71	0	20	33	196	235
ASV_22	23	16	9	17	13	0	24	14	0	12	33	34	27	24	17	159	164	82	173	146	44	74	0	118	25
ASV_23	0	0	0	0	0	0	0	0	0	0	0	0	0	0	0	0	0	0	17	0	29	0	1178	0	0
ASV_24	47	48	45	45	44	32	73	47	41	51	37	39	48	41	45	20	35	33	74	43	43	59	45	81	106
ASV_25	0	0	0	0	0	0	27	0	0	0	0	0	0	0	0	12	40	0	33	15	29	27	998	0	0
ASV_26	67	63	52	58	54	37	53	43	36	54	69	103	68	68	74	44	66	34	44	65	0	0	0	19	0
ASV_27	58	54	73	52	74	40	101	57	52	50	39	55	53	42	56	47	27	37	48	60	0	17	0	38	17
ASV_28	37	37	32	39	39	13	37	17	16	21	53	55	60	40	70	66	116	78	104	70	14	16	71	42	0
ASV_29	0	0	0	0	0	0	0	0	0	0	0	0	0	0	0	0	0	0	0	0	105	139	365	155	364
ASV_30	80	60	60	78	95	48	84	56	36	64	31	43	39	23	50	20	0	38	35	37	16	0	61	8	0
ASV_31	72	64	58	65	75	53	79	61	54	59	32	44	34	32	40	14	6	19	21	0	13	17	28	34	25
ASV_32	47	60	43	41	68	37	52	49	39	44	71	69	69	75	63	21	18	14	17	0	0	0	0	0	0
ASV_33	26	35	30	16	14	22	46	34	30	35	37	63	55	52	60	15	0	17	0	0	16	114	0	46	116
ASV_34	31	23	34	20	33	22	65	31	26	30	52	76	79	54	68	35	23	0	21	19	0	32	70	33	0
ASV_35	0	0	0	0	0	0	0	0	0	0	0	0	0	0	0	44	132	18	49	20	58	95	128	160	163
ASV_36	71	50	40	44	52	28	70	40	49	48	39	32	54	29	49	0	38	14	42	45	0	0	0	0	30
ASV_37	46	44	44	35	45	34	68	54	27	32	59	101	81	60	79	13	0	0	0	0	0	9	0	0	0
ASV_38	36	31	31	30	47	25	53	36	28	32	47	71	55	54	53	11	19	19	68	42	0	21	0	15	0
ASV_39	33	36	29	21	36	31	33	19	18	29	50	63	61	60	71	56	43	22	69	17	0	0	0	23	0
ASV_40	41	60	63	65	57	26	43	35	39	64	18	10	26	21	16	30	16	0	34	25	10	22	0	0	73
ASV_41	22	26	18	25	26	15	32	33	15	33	45	62	71	55	83	95	40	18	31	0	0	32	0	0	0
ASV_42	50	53	52	61	63	36	66	52	55	64	32	22	29	18	27	43	9	0	13	24	0	0	0	0	0
ASV_43	37	27	28	28	34	24	34	19	19	18	41	34	62	46	69	26	0	59	0	40	16	66	19	0	0
ASV_44	28	32	27	28	32	20	31	13	17	23	82	101	82	83	94	5	11	8	13	0	9	0	0	7	0
ASV_45	71	52	46	38	53	18	43	36	21	30	55	44	44	72	50	12	25	24	0	0	0	0	0	0	0
ASV_46	0	0	0	0	0	0	0	0	0	0	0	0	0	0	0	0	0	0	0	0	70	149	182	125	186
ASV_47	58	35	33	38	54	17	49	36	26	34	31	53	26	25	37	26	14	10	32	23	0	22	0	0	0
ASV_48	41	47	52	53	62	25	42	34	27	39	49	48	44	25	49	0	0	0	0	17	0	0	0	0	0
ASV_49	0	3	0	0	0	0	6	0	0	0	0	0	0	0	0	35	47	23	36	21	108	125	37	70	130
ASV_50	10	0	0	15	0	0	0	0	0	0	0	12	0	0	0	0	14	0	29	32	41	88	0	48	340
ASV_51	0	0	0	0	5	0	0	0	0	0	0	0	0	4	0	0	0	0	0	0	76	109	0	88	345
ASV_52	28	38	28	33	28	31	65	22	33	49	31	25	31	19	34	46	0	11	24	9	19	0	0	0	22
ASV_53	21	24	24	22	22	25	33	27	16	23	33	53	45	46	52	0	0	17	25	72	34	0	0	0	0
ASV_54	24	37	25	18	24	0	28	37	51	18	47	53	38	57	58	0	0	10	25	0	18	0	0	43	0
ASV_55	29	22	17	27	23	21	42	17	24	25	40	69	68	49	69	9	0	19	29	9	0	0	0	0	0
ASV_56	43	35	47	51	65	28	58	27	24	33	30	28	16	0	15	27	30	11	14	0	0	22	0	0	0
ASV_57	23	35	33	19	24	22	22	26	22	21	28	39	32	24	31	52	29	27	32	27	13	0	10	0	0
ASV_58	35	26	33	24	39	17	42	35	29	29	31	23	37	35	40	28	36	0	17	18	0	13	0	0	0
ASV_59	38	33	37	35	50	17	37	22	23	56	19	0	14	0	18	11	72	39	33	10	0	0	0	21	0
ASV_60	20	22	15	24	22	20	30	19	20	17	28	28	24	26	36	43	0	0	28	0	35	63	0	34	28
ASV_61	33	35	32	37	60	26	31	30	22	42	18	22	15	9	24	0	10	18	13	34	18	15	0	17	0
ASV_62	28	45	34	32	40	27	38	21	24	20	13	33	20	14	23	21	0	0	20	17	0	50	0	0	37
ASV_63	30	28	19	26	27	15	25	17	21	16	18	23	21	18	28	48	13	9	24	20	23	34	0	21	29
ASV_64	26	46	40	47	30	29	36	38	32	32	25	25	36	24	36	0	15	0	11	0	0	22	0	0	0
ASV_65	22	28	26	20	36	12	44	31	31	31	20	22	32	28	42	0	27	9	8	25	11	0	23	14	0
ASV_66	45	38	36	36	37	19	32	32	22	25	15	23	18	25	25	0	0	0	16	15	9	14	25	16	17
ASV_67	39	42	41	48	41	32	31	38	25	45	27	26	22	0	44	21	0	0	0	0	11	0	0	0	0
ASV_68	22	35	36	17	28	17	25	42	27	22	20	35	26	36	35	0	0	0	48	0	17	25	0	0	0
ASV_69	0	0	0	0	0	0	43	0	0	0	7	0	0	0	0	35	11	9	154	114	35	0	0	49	55
ASV_70	38	52	56	41	44	30	41	41	31	27	18	0	16	18	20	10	0	0	0	0	16	0	0	12	0
ASV_71	26	26	20	16	14	24	50	35	25	22	37	33	22	26	26	18	11	0	19	11	17	24	0	0	0
ASV_72	34	28	20	38	24	16	29	30	37	25	30	26	0	25	25	16	0	21	0	0	0	19	0	0	56
ASV_73	30	24	22	20	31	18	21	20	18	21	29	60	34	31	42	20	0	12	12	10	0	0	0	21	0
ASV_74	19	19	28	19	28	9	27	22	12	29	31	33	31	36	42	18	10	0	24	20	0	15	0	16	0
ASV_75	22	21	24	17	18	23	31	27	27	9	18	25	15	23	29	50	5	31	0	20	0	36	0	0	0
ASV_76	18	26	16	23	19	27	37	27	16	30	20	26	34	25	36	0	0	25	0	16	0	0	0	22	25
ASV_77	25	32	25	25	27	34	28	15	20	20	16	22	15	11	24	17	0	7	0	18	0	0	43	0	37
ASV_78	34	23	19	26	19	16	21	15	16	14	26	43	33	28	37	0	0	10	0	0	16	35	0	22	0
ASV_79	42	52	37	52	61	22	16	23	20	24	12	11	16	24	30	0	0	0	0	0	0	0	0	0	0
ASV_80	10	13	17	15	9	33	19	23	22	20	13	21	10	29	25	16	0	20	33	31	13	0	0	0	35
ASV_81	32	22	33	29	30	27	27	24	40	23	0	18	17	0	19	12	16	6	14	28	0	0	0	9	0
ASV_82	29	31	20	21	31	14	29	26	22	26	30	32	31	29	25	0	0	6	0	0	0	21	0	0	0
ASV_83	26	18	15	19	23	15	27	8	13	11	46	51	30	47	48	0	0	0	0	4	0	0	0	22	0
ASV_84	17	16	15	17	19	14	22	9	15	12	17	30	20	25	39	11	0	9	20	0	14	0	0	0	79
ASV_85	19	14	19	20	16	19	30	10	25	19	24	28	31	32	32	26	0	0	19	0	0	0	0	36	0
ASV_86	11	27	18	26	20	14	33	27	19	23	25	36	26	22	35	0	11	13	0	0	17	0	0	15	0
ASV_87	17	16	22	20	20	10	25	13	15	25	26	48	36	31	54	12	4	0	8	0	0	15	0	0	0
ASV_88	21	22	11	17	17	15	14	8	18	18	46	49	39	39	44	11	10	0	0	0	0	16	0	0	0
ASV_89	15	19	16	20	18	10	21	13	12	21	28	26	23	30	45	23	0	0	40	0	10	0	25	0	0
ASV_90	42	20	27	16	27	27	22	28	32	24	18	27	19	17	12	32	0	0	0	17	0	0	0	0	0
ASV_91	22	24	20	19	18	19	39	12	12	15	26	53	33	38	34	9	0	7	0	0	0	0	0	0	0
ASV_92	0	0	0	6	8	0	0	0	0	0	0	14	15	0	14	88	25	15	64	65	28	27	0	19	0
ASV_93	20	15	17	15	34	18	12	16	11	15	17	26	29	36	35	11	0	0	10	20	9	0	0	20	0
ASV_94	21	19	15	29	16	23	26	25	20	15	20	26	29	26	38	0	0	7	0	19	0	0	0	0	0
ASV_95	22	11	15	30	24	14	35	22	14	15	16	0	13	16	12	35	0	0	25	0	0	0	53	0	0
ASV_96	0	0	0	0	0	0	0	0	0	0	0	0	0	0	0	0	0	0	0	0	30	61	103	82	92
ASV_97	20	32	18	19	26	8	20	17	13	20	12	13	0	0	18	7	0	0	31	0	0	0	90	0	0
ASV_98	24	32	17	44	17	0	14	21	26	38	20	20	19	0	23	0	0	0	40	8	0	0	0	0	0
ASV_99	0	40	34	38	43	0	31	0	29	22	29	41	19	25	0	0	10	0	0	0	0	0	0	0	0
ASV_100	0	0	0	0	0	0	0	0	0	0	0	0	0	0	0	0	33	14	10	19	15	0	163	48	58
ASV_101	5	4	3	3	5	3	4	0	0	0	4	7	0	0	0	0	11	0	0	0	51	39	0	32	188
ASV_102	9	15	8	9	12	0	23	15	8	15	21	26	29	29	38	38	14	11	0	23	0	0	0	10	0
ASV_103	0	0	0	0	0	0	0	0	0	0	0	0	0	0	0	0	0	0	0	0	21	0	328	0	0
ASV_104	31	30	0	32	38	22	46	0	22	21	0	25	27	0	30	0	23	0	0	0	0	0	0	0	0
ASV_105	0	0	0	0	0	0	0	0	0	0	0	0	0	0	0	0	19	20	40	0	0	69	190	0	0
ASV_106	50	36	40	32	26	0	24	0	0	0	28	20	26	21	20	0	0	11	0	0	0	0	0	0	0
ASV_107	0	0	3	8	0	0	10	0	0	0	0	7	0	8	9	4	31	26	12	0	56	109	29	17	0
ASV_108	0	5	23	0	24	0	13	13	0	0	31	45	51	30	33	0	0	0	0	22	0	0	0	0	32
ASV_109	0	9	0	0	0	0	0	0	0	0	0	0	0	10	11	58	65	23	0	35	7	30	0	15	57
ASV_110	21	18	24	18	28	18	22	29	16	18	24	23	16	0	16	0	25	0	0	0	0	0	0	0	0
ASV_111	32	26	26	32	20	12	24	23	24	11	10	9	6	19	19	0	0	12	8	0	0	0	0	0	0
ASV_112	21	21	18	18	24	16	37	31	19	22	21	26	13	0	26	0	0	0	0	0	0	0	0	0	0
ASV_113	0	0	0	0	0	0	0	0	0	0	0	0	0	0	0	12	0	0	0	0	58	96	0	42	103
ASV_114	11	0	16	28	17	9	37	7	10	9	15	22	21	16	31	0	0	0	18	18	0	14	0	8	0
ASV_115	15	18	20	20	15	6	26	13	11	14	14	32	27	26	16	13	0	0	11	8	0	0	0	0	0
ASV_116	12	14	18	9	14	9	13	6	11	0	12	24	16	25	26	0	7	14	28	8	0	15	0	19	0
ASV_117	25	15	15	23	16	16	18	20	16	17	16	37	19	20	25	0	0	0	0	0	0	0	0	0	0
ASV_118	11	22	18	16	25	0	0	0	0	17	0	10	9	0	19	51	14	0	13	17	7	16	0	12	20
ASV_119	0	0	0	0	0	0	89	0	0	0	0	0	0	0	0	120	8	19	43	0	0	0	0	0	15
ASV_120	0	0	0	0	0	0	0	0	0	0	0	11	0	0	0	48	0	26	31	29	24	28	0	0	96
ASV_121	0	0	0	0	0	0	0	0	0	0	0	0	0	0	0	0	0	0	0	0	33	39	65	44	111
ASV_122	0	0	0	0	0	0	0	0	0	0	0	0	0	0	0	0	0	0	0	0	19	35	97	50	84
ASV_123	16	24	15	7	17	9	16	8	9	9	17	29	23	27	29	12	0	16	0	0	0	0	0	0	0
ASV_124	0	0	10	0	15	9	14	0	17	14	0	0	19	0	12	0	0	0	22	9	9	0	67	23	41
ASV_125	18	20	19	21	33	0	34	24	22	30	0	0	10	0	0	0	0	0	0	17	0	17	0	15	0
ASV_126	19	11	36	6	17	29	17	17	21	20	12	12	19	19	14	0	0	6	0	0	0	1	0	0	0
ASV_127	18	21	11	7	15	13	15	12	8	9	15	20	25	32	26	10	0	0	6	0	0	13	0	0	0
ASV_128	14	9	8	11	15	12	22	0	8	8	17	22	17	29	19	0	12	0	11	0	0	0	0	0	42
ASV_129	11	20	0	16	13	11	20	19	11	12	0	6	10	11	10	0	0	0	0	13	0	21	0	20	51
ASV_130	14	16	14	17	16	15	15	10	8	15	22	23	21	25	23	19	0	0	0	0	0	0	0	0	0
ASV_131	13	11	14	10	7	9	12	9	8	8	8	13	0	10	16	18	28	16	32	23	7	0	0	0	0
ASV_132	13	16	12	17	14	8	17	0	15	16	10	20	25	12	19	0	0	7	39	11	0	0	0	0	0
ASV_133	13	17	23	21	22	3	10	6	11	24	0	8	11	9	11	14	17	5	26	19	0	0	0	0	0
ASV_134	22	27	29	28	38	39	32	0	0	37	0	0	0	0	0	0	17	0	0	0	0	0	0	0	0
ASV_135	12	11	23	21	17	12	20	10	0	0	16	19	19	14	13	0	8	19	24	11	0	0	0	0	0
ASV_136	3	7	4	6	4	4	14	9	0	0	17	12	8	12	18	11	28	16	26	0	14	25	0	0	31
ASV_137	9	15	11	12	12	7	17	14	12	10	17	18	20	23	18	15	0	0	8	25	0	0	0	0	0
ASV_138	15	9	7	5	11	10	16	6	5	4	22	22	19	16	31	24	0	8	0	0	8	23	0	0	0
ASV_139	24	26	16	19	18	15	18	11	17	14	13	13	9	10	28	6	0	0	0	0	0	0	0	0	0
ASV_140	12	19	16	33	24	15	0	13	11	19	0	28	19	0	13	0	0	0	0	0	0	0	0	0	35
ASV_141	0	0	0	0	0	0	0	0	0	0	0	0	0	15	0	0	0	0	52	11	0	0	0	45	133
ASV_142	30	34	24	24	25	10	24	31	0	17	0	0	13	6	15	0	0	0	0	0	0	0	0	0	0
ASV_143	7	15	21	17	18	8	17	16	14	17	7	0	7	0	18	0	0	11	0	10	0	0	0	0	41
ASV_144	10	8	8	13	13	8	13	10	9	11	12	25	18	14	28	24	0	9	7	0	0	0	0	0	0
ASV_145	25	19	22	21	0	0	0	0	0	0	0	36	23	24	38	20	0	0	0	0	0	0	0	11	0
ASV_146	17	15	25	27	20	9	13	19	19	23	6	8	0	6	6	0	0	0	10	16	0	0	0	0	0
ASV_147	0	0	0	0	0	0	0	0	0	0	0	0	0	0	0	0	0	0	0	0	19	29	63	46	77
ASV_148	14	15	19	0	19	0	12	0	0	0	23	35	32	16	26	0	0	0	0	0	0	0	0	21	0
ASV_149	0	0	0	0	0	0	0	0	0	0	0	0	0	0	0	0	0	0	0	0	0	0	231	0	0
ASV_150	10	11	11	0	15	9	8	16	10	19	13	13	13	10	19	0	0	0	0	12	9	19	0	13	0
ASV_151	9	14	18	21	15	0	12	6	10	13	0	16	10	9	10	34	23	0	0	0	0	0	0	10	0
ASV_152	0	11	14	0	12	16	10	14	22	13	24	19	17	20	15	0	0	0	22	0	0	0	0	0	0
ASV_153	12	11	14	7	16	11	11	14	13	7	5	2	7	4	13	0	0	0	6	0	0	16	11	30	18
ASV_154	0	0	22	25	13	17	13	17	19	22	0	8	0	0	20	0	0	25	27	0	0	0	0	0	0
ASV_155	13	17	16	0	0	14	12	17	11	0	17	0	24	22	19	0	0	16	29	0	0	0	0	0	0
ASV_156	8	13	0	6	0	0	0	0	0	0	0	13	6	0	0	4	15	0	0	24	22	37	59	20	0
ASV_157	11	17	0	8	12	13	0	14	5	10	15	9	18	14	19	19	0	0	0	0	0	42	0	0	0
ASV_158	9	9	9	0	8	0	15	16	6	9	0	0	13	0	0	0	0	6	0	15	11	15	28	31	26
ASV_159	0	0	0	0	0	0	0	0	0	0	0	0	0	0	0	0	5	0	0	0	0	29	81	0	111
ASV_160	12	12	7	5	8	9	17	10	0	7	8	26	18	18	25	13	8	6	0	0	0	16	0	0	0
ASV_161	8	11	12	13	3	22	8	12	21	16	11	15	26	17	14	0	1	5	0	0	0	9	0	0	0
ASV_162	21	24	24	26	14	0	22	20	23	23	0	0	0	12	0	14	0	0	0	0	0	0	0	0	0
ASV_163	13	9	13	9	11	0	18	12	0	7	18	10	21	13	19	19	16	0	0	0	15	0	0	0	0
ASV_164	10	18	13	16	17	22	16	0	13	9	0	16	19	15	16	0	0	6	0	17	0	0	0	0	0
ASV_165	0	0	0	0	0	0	0	0	0	0	0	0	0	0	0	0	0	20	0	0	17	19	0	14	152
ASV_166	0	0	0	0	6	0	0	0	0	0	0	0	0	0	0	13	0	13	0	26	19	25	28	13	78
ASV_167	0	0	0	0	0	0	18	0	0	0	0	0	0	0	0	9	109	11	0	0	0	73	0	0	0
ASV_168	0	15	16	21	12	8	0	15	0	14	28	22	22	25	0	0	5	0	15	0	0	0	0	0	0
ASV_169	10	8	10	15	21	0	13	13	7	0	0	9	0	0	12	18	0	10	0	0	13	37	0	21	0
ASV_170	12	17	18	12	17	0	13	0	0	0	22	35	17	21	25	0	0	7	0	0	0	0	0	0	0
ASV_171	0	39	0	0	36	0	0	0	0	0	39	14	9	0	26	32	0	19	0	0	0	0	0	0	0
ASV_172	12	17	19	15	18	6	26	17	12	15	15	13	0	0	0	8	0	5	0	0	12	0	0	0	0
ASV_173	10	19	0	0	0	12	21	0	0	0	0	12	19	15	12	37	11	10	18	0	0	0	0	14	0
ASV_174	17	11	16	16	15	0	13	7	0	13	13	17	25	15	31	0	0	0	0	0	0	0	0	0	0
ASV_175	13	22	0	0	0	0	0	11	11	13	15	28	21	25	25	0	7	18	0	0	0	0	0	0	0
ASV_176	20	17	12	0	9	6	9	16	0	13	8	23	13	17	19	8	0	11	0	6	0	0	0	0	0
ASV_177	9	5	0	0	0	0	0	0	0	0	13	12	10	0	17	8	0	0	0	10	0	64	0	0	58
ASV_178	19	14	15	10	0	9	17	19	15	0	16	24	0	18	0	0	0	0	0	0	0	0	0	0	26
ASV_179	0	27	25	19	14	0	25	18	10	15	0	10	8	0	14	0	0	6	0	0	11	0	0	0	0
ASV_180	0	0	0	0	0	0	0	0	0	0	0	8	0	11	0	0	0	10	0	0	27	65	0	55	24
ASV_181	6	12	11	13	11	7	8	9	9	17	0	7	12	5	5	0	0	7	12	0	5	0	0	0	42
ASV_182	7	11	9	7	16	7	8	7	12	7	22	17	18	15	15	0	0	18	0	0	0	0	0	0	0
ASV_183	15	10	0	11	9	11	22	16	13	16	10	16	16	12	18	0	0	0	0	0	0	0	0	0	0
ASV_184	10	14	0	12	10	7	0	0	0	0	26	26	29	16	20	0	0	0	0	11	0	0	0	14	0
ASV_185	0	0	0	0	0	0	0	0	0	0	0	0	0	0	0	0	0	16	20	0	0	0	75	26	56
ASV_186	12	13	14	17	15	9	7	13	13	0	0	6	0	0	9	10	0	7	12	0	6	0	0	29	0
ASV_187	9	5	12	6	13	8	7	6	6	5	17	20	26	19	12	0	0	0	10	0	0	0	0	0	11
ASV_188	0	0	0	0	0	0	0	0	0	0	0	0	0	0	0	0	35	0	116	15	26	0	0	0	0
ASV_189	18	12	25	20	20	20	19	12	0	0	0	16	0	0	0	18	0	0	0	0	0	0	0	10	0
ASV_190	9	12	13	0	11	0	15	0	0	0	16	17	18	10	13	18	0	0	0	8	9	0	0	20	0
ASV_191	17	0	0	24	23	14	25	22	13	14	0	0	0	16	0	0	17	0	0	0	0	0	0	0	0
ASV_192	0	0	0	0	0	0	0	0	0	0	0	0	0	0	0	0	0	0	0	0	40	7	119	19	0
ASV_193	0	0	0	0	0	0	0	0	0	0	0	0	0	0	0	0	0	0	0	0	12	35	64	26	48
ASV_194	12	17	0	9	9	9	18	12	8	11	11	11	18	13	13	0	0	0	13	0	0	0	0	0	0
ASV_195	21	32	26	32	18	0	9	15	0	10	0	0	0	0	0	0	0	0	0	0	0	0	20	0	0
ASV_196	12	15	24	22	15	0	12	21	20	16	0	0	0	0	9	14	0	0	0	0	0	0	0	0	0
ASV_197	7	13	0	9	10	0	13	9	5	8	15	12	18	20	22	0	0	7	12	0	0	0	0	0	0
ASV_198	0	0	0	11	0	0	16	0	0	20	27	0	0	0	27	0	0	0	55	24	0	0	0	0	0
ASV_199	19	14	5	12	12	9	0	11	10	12	14	22	10	13	15	0	0	0	0	0	0	0	0	0	0
ASV_200	8	11	7	15	12	6	13	10	13	7	17	15	16	15	13	0	0	0	0	0	0	0	0	0	0
ASV_201	7	8	0	6	5	0	0	7	8	6	16	0	10	5	8	11	9	10	41	21	0	0	0	0	0
ASV_202	0	0	0	16	0	0	0	0	0	0	0	0	0	0	0	33	22	15	19	18	32	0	0	23	0
ASV_203	30	0	20	11	26	0	21	13	21	0	10	0	14	11	0	0	0	0	0	0	0	0	0	0	0
ASV_204	0	0	0	0	0	0	0	0	0	0	0	0	0	0	0	0	0	0	0	0	10	0	167	0	0
ASV_205	18	15	10	0	0	0	23	12	18	0	0	0	0	16	0	35	0	11	13	0	0	0	0	5	0
ASV_206	12	5	4	11	10	10	10	0	2	8	5	6	0	8	8	15	30	0	0	0	0	0	0	31	0
ASV_207	10	13	0	0	0	13	0	0	0	0	18	22	22	8	14	0	14	0	21	18	0	0	0	0	0
ASV_208	10	11	9	8	12	0	16	6	11	7	10	12	16	15	13	0	0	0	0	16	0	0	0	0	0
ASV_209	0	0	0	11	0	0	0	9	0	0	25	20	39	24	34	0	0	0	0	9	0	0	0	0	0
ASV_210	0	0	0	0	0	0	0	0	0	10	0	0	0	0	0	0	0	8	70	47	0	0	36	0	0
ASV_211	25	22	0	0	0	10	9	0	0	0	0	0	0	0	0	0	25	8	0	0	9	0	0	0	60
ASV_212	6	8	7	10	7	6	11	9	0	10	11	15	12	9	10	8	0	0	0	5	10	0	0	0	14
ASV_213	0	0	0	6	7	0	0	0	0	4	8	18	0	11	11	7	0	0	0	48	0	48	0	0	0
ASV_214	0	8	6	11	11	0	10	5	0	6	13	15	10	16	6	0	7	0	12	0	0	31	0	0	0
ASV_215	8	21	21	17	0	0	6	0	0	0	21	20	23	11	0	0	0	0	0	0	0	0	0	17	0
ASV_216	0	0	0	0	0	0	0	0	0	0	0	0	0	0	0	0	0	0	0	0	16	0	149	0	0
ASV_217	15	19	0	0	12	11	0	10	16	15	19	0	13	21	13	0	0	0	0	0	0	0	0	0	0
ASV_218	0	0	0	0	0	0	0	0	0	0	0	0	0	0	0	6	9	13	0	17	0	23	67	29	0
ASV_219	19	8	15	8	13	12	13	11	8	5	0	9	7	0	0	0	9	9	17	0	0	0	0	0	0
ASV_220	11	8	0	5	6	7	9	10	7	0	18	9	8	11	22	0	0	11	0	3	18	0	0	0	0
ASV_221	9	7	9	9	13	0	13	10	7	7	10	7	15	26	21	0	0	0	0	0	0	0	0	0	0
ASV_222	0	0	0	0	0	0	0	0	0	0	0	0	0	0	0	6	0	0	60	97	0	0	0	0	0
ASV_223	11	11	10	10	0	0	0	11	0	0	0	20	27	13	18	31	0	0	0	0	0	0	0	0	0
ASV_224	0	0	11	17	14	0	0	12	23	9	8	0	0	10	12	13	0	0	10	0	0	23	0	0	0
ASV_225	0	0	0	0	0	0	0	0	0	0	0	0	0	0	0	0	0	0	0	0	52	28	0	52	30
ASV_226	12	0	7	12	17	11	12	9	0	13	16	20	16	0	16	0	0	0	0	0	0	0	0	0	0
ASV_227	8	13	0	13	11	0	11	9	0	0	8	13	15	14	14	0	0	8	5	0	0	17	0	0	0
ASV_228	9	15	0	14	12	8	14	0	0	14	13	0	0	0	14	9	12	0	0	0	0	24	0	0	0
ASV_229	0	24	0	0	20	0	20	17	9	19	0	0	0	19	18	0	12	0	0	0	0	0	0	0	0
ASV_230	19	28	0	12	18	9	19	16	7	20	0	0	9	0	0	0	0	0	0	0	0	0	0	0	0
ASV_231	18	0	21	14	0	10	16	0	0	14	0	0	0	13	8	0	0	19	24	0	0	0	0	0	0
ASV_232	0	11	11	21	11	11	0	11	0	11	8	11	0	4	0	0	0	6	12	6	10	8	0	0	5
ASV_233	0	0	7	8	10	8	13	10	9	7	13	16	19	15	21	0	0	0	0	0	0	0	0	0	0
ASV_234	0	0	0	0	0	0	3	0	0	0	0	0	0	0	0	0	0	19	0	0	7	16	0	0	111
ASV_235	9	6	3	8	11	3	18	10	3	13	5	17	13	13	8	0	0	0	15	0	0	0	0	0	0
ASV_236	0	0	0	0	0	0	0	0	0	0	0	0	0	0	0	9	0	0	0	10	39	0	0	0	97
ASV_237	0	0	0	0	0	0	0	0	0	0	0	0	0	0	0	0	0	0	0	0	0	0	62	27	66
ASV_238	24	22	23	11	23	0	24	18	0	9	0	0	0	0	0	0	0	0	0	0	0	0	0	0	0
ASV_239	15	10	11	14	12	4	16	3	9	6	12	9	7	12	12	0	0	0	0	0	0	0	0	0	0
ASV_240	8	6	20	12	4	6	11	16	8	14	9	5	7	19	6	0	1	0	0	0	0	0	0	0	0
ASV_241	7	0	0	8	5	6	0	0	0	0	7	12	11	10	15	0	0	0	0	0	18	31	0	22	0
ASV_242	0	16	15	0	10	12	14	15	0	13	0	11	14	0	13	0	0	12	0	7	0	0	0	0	0
ASV_243	4	14	21	18	15	8	15	9	11	14	5	0	7	0	10	0	0	0	0	0	0	0	0	0	0
ASV_244	45	32	32	0	0	0	0	0	27	0	0	0	0	0	0	0	14	0	0	0	0	0	0	0	0
ASV_245	12	8	10	7	0	0	10	13	0	8	0	14	0	12	7	0	0	0	0	0	16	33	0	0	0
ASV_246	11	9	11	12	14	0	0	0	0	9	14	0	11	10	19	0	0	7	0	0	0	0	0	0	23
ASV_247	9	4	7	4	7	3	10	0	6	7	7	17	15	6	11	19	0	7	11	0	0	0	0	0	0
ASV_248	7	11	0	7	2	3	0	7	0	4	7	11	5	9	0	15	13	0	0	23	0	0	0	0	26
ASV_249	0	9	12	9	14	0	6	0	8	8	3	9	0	0	0	14	0	0	0	0	11	0	0	0	47
ASV_250	15	19	12	7	14	11	15	4	11	10	0	12	0	0	9	0	0	0	0	10	0	0	0	0	0
ASV_251	10	15	8	15	17	9	13	15	12	11	7	6	11	0	0	0	0	0	0	0	0	0	0	0	0
ASV_252	8	13	11	18	14	0	8	9	7	12	10	13	11	0	8	0	0	0	7	0	0	0	0	0	0
ASV_253	0	13	13	10	0	7	14	0	0	11	8	0	9	8	0	0	0	0	0	0	0	54	0	0	0
ASV_254	15	0	0	17	0	0	9	0	13	12	13	14	20	14	0	19	0	0	0	0	0	0	0	0	0
ASV_255	8	11	12	14	7	0	16	7	15	6	5	0	7	8	8	10	0	0	12	0	0	0	0	0	0
ASV_256	3	0	0	0	10	0	9	0	0	6	15	17	8	11	16	10	10	0	15	0	0	0	0	16	0
ASV_257	0	0	10	12	11	0	10	0	0	0	0	10	0	12	0	0	15	24	8	5	28	0	0	0	0
ASV_258	11	10	7	0	0	0	13	0	0	0	0	0	12	0	13	13	0	0	0	0	0	0	65	0	0
ASV_259	9	0	13	0	0	0	0	7	0	12	10	15	21	10	18	0	8	0	6	0	0	0	5	0	10
ASV_260	0	0	32	0	0	0	0	0	12	0	36	0	30	0	33	0	0	0	0	0	0	0	0	0	0
ASV_261	0	0	0	0	0	0	0	0	0	0	0	0	0	3	0	0	8	0	0	0	0	34	0	0	98
ASV_262	21	20	0	16	0	11	0	22	0	0	0	0	0	13	23	0	0	0	0	0	0	0	0	16	0
ASV_263	15	0	14	8	14	10	21	11	11	10	0	0	0	6	0	14	0	8	0	0	0	0	0	0	0
ASV_264	17	18	0	0	0	0	23	0	0	0	0	19	17	21	0	0	0	0	0	0	26	0	0	0	0
ASV_265	14	13	17	7	28	12	0	14	16	12	0	0	0	0	0	0	0	0	7	0	0	0	0	0	0
ASV_266	12	9	0	10	1	28	3	7	0	5	16	0	28	0	12	0	9	0	0	0	0	0	0	0	0
ASV_267	0	0	0	0	0	0	0	0	0	0	0	0	0	0	0	11	12	9	0	0	0	31	37	0	40
ASV_268	0	0	0	0	0	0	0	0	0	0	0	0	0	0	0	0	0	0	0	0	15	15	45	17	48
ASV_269	12	0	16	11	15	0	19	14	0	15	0	15	0	0	12	0	0	0	0	10	0	0	0	0	0
ASV_270	0	0	0	0	12	0	0	0	0	22	0	0	24	0	26	14	28	0	13	0	0	0	0	0	0
ASV_271	0	0	0	0	0	0	0	0	0	0	0	0	0	0	12	23	0	19	9	12	0	13	0	20	31
ASV_272	16	3	11	5	5	7	5	8	8	8	0	9	3	7	0	0	17	0	12	14	0	0	0	0	0
ASV_273	9	11	6	0	9	3	15	12	0	6	10	10	0	13	15	6	0	0	0	0	0	0	0	13	0
ASV_274	0	0	0	0	0	0	0	0	0	0	0	0	0	0	0	0	0	0	48	0	0	0	0	0	90
ASV_275	0	0	12	16	10	8	9	10	0	0	0	0	8	0	11	0	11	0	0	0	0	0	0	0	42
ASV_276	15	12	9	7	8	0	7	0	0	0	9	17	11	16	13	0	0	0	11	0	0	0	0	0	0
ASV_277	0	14	19	14	21	0	21	0	0	0	15	0	18	0	13	0	0	0	0	0	0	0	0	0	0
ASV_278	22	16	0	14	21	0	0	0	8	0	0	0	23	13	17	0	0	0	0	0	0	0	0	0	0
ASV_279	15	13	15	11	16	0	13	20	0	6	12	0	0	0	13	0	0	0	0	0	0	0	0	0	0
ASV_280	9	12	8	6	9	0	0	6	6	7	6	0	7	18	0	13	0	0	0	0	0	26	0	0	0
ASV_281	0	10	0	29	17	17	15	5	0	0	0	0	0	0	4	1	0	20	0	15	0	0	0	0	0
ASV_282	0	0	0	0	0	0	0	0	0	0	0	0	0	0	0	8	0	0	0	0	18	35	0	31	41
ASV_283	10	0	0	7	0	0	13	0	0	0	11	19	22	20	23	0	7	0	0	0	0	0	0	0	0
ASV_284	7	0	5	11	10	8	9	7	5	8	0	0	8	0	20	0	17	5	12	0	0	0	0	0	0
ASV_285	0	0	0	7	0	0	15	0	0	0	5	15	7	8	0	12	11	29	0	0	23	0	0	0	0
ASV_286	0	0	0	0	0	0	0	0	0	0	0	0	0	0	0	0	0	0	6	0	0	36	0	16	74
ASV_287	4	0	0	0	5	0	0	0	0	2	7	15	9	13	4	10	7	0	0	0	0	0	0	16	39
ASV_288	0	0	0	0	0	0	0	0	0	0	0	0	0	0	0	0	14	0	64	0	17	0	17	19	0
ASV_289	12	8	9	9	9	0	9	8	11	10	0	0	0	0	0	0	0	0	0	0	0	17	0	0	28
ASV_290	8	0	5	0	0	8	10	0	0	9	8	17	10	10	8	0	0	15	11	11	0	0	0	0	0
ASV_291	0	10	9	7	13	3	8	7	8	0	8	5	11	6	6	0	0	0	8	6	0	0	0	15	0
ASV_292	9	8	5	0	10	0	12	0	0	0	0	10	8	0	16	8	0	0	0	0	0	0	42	0	0
ASV_293	0	10	0	0	12	0	0	0	0	0	0	0	12	0	21	36	0	0	0	0	0	20	0	0	16
ASV_294	0	19	0	0	0	0	0	0	3	0	0	12	19	12	14	14	0	0	0	0	0	0	0	0	33
ASV_295	0	11	9	10	0	10	19	9	0	7	0	0	7	9	0	16	14	0	0	5	0	0	0	0	0
ASV_296	0	0	8	0	5	0	7	0	0	11	10	8	18	14	17	0	0	0	0	8	0	0	20	0	0
ASV_297	0	5	4	5	3	4	7	6	3	2	11	14	26	0	17	0	0	0	18	0	0	0	0	0	0
ASV_298	0	0	18	12	19	0	8	0	0	0	0	14	19	0	29	0	0	0	0	0	0	0	0	6	0
ASV_299	0	0	0	0	0	0	0	0	0	0	0	0	6	0	0	27	9	0	0	11	13	25	34	0	0
ASV_300	0	0	21	0	0	0	0	0	0	0	21	41	27	0	14	0	0	0	0	0	0	0	0	0	0
ASV_301	0	9	5	0	4	0	7	6	10	0	6	10	23	14	11	0	0	0	18	0	0	0	0	0	0
ASV_302	0	0	0	0	17	0	20	16	21	20	29	0	0	0	0	0	0	0	0	0	0	0	0	0	0
ASV_303	0	0	0	0	11	0	0	0	0	0	10	0	10	0	10	13	0	0	0	0	0	21	48	0	0
ASV_304	0	0	0	0	0	0	0	0	0	0	0	0	0	0	0	28	0	30	30	15	0	0	0	18	0
ASV_305	0	0	0	0	0	0	0	0	0	0	0	0	0	0	0	0	0	0	0	0	53	0	25	23	20
ASV_306	0	0	0	0	0	0	0	0	0	0	0	0	0	0	0	0	0	0	0	0	0	0	62	0	59
ASV_307	0	6	0	0	0	0	0	0	0	0	0	0	0	0	0	0	8	0	7	0	10	10	34	26	19
ASV_308	10	0	11	11	12	0	8	0	0	8	12	0	6	0	0	0	7	0	34	0	0	0	0	0	0
ASV_309	6	7	6	6	9	0	2	0	0	0	15	15	8	15	13	0	0	9	8	0	0	0	0	0	0
ASV_310	4	6	7	0	8	8	8	10	7	10	7	6	0	0	7	0	0	0	9	0	0	0	0	22	0
ASV_311	0	0	0	0	0	0	0	0	0	0	0	0	0	0	0	0	22	0	0	22	14	0	30	13	18
ASV_312	0	0	0	0	0	0	0	0	0	0	0	0	0	0	0	0	0	0	0	0	15	27	0	22	55
ASV_313	10	0	15	11	0	0	11	6	0	9	15	8	9	14	10	0	0	0	0	0	0	0	0	0	0
ASV_314	0	0	0	0	0	0	0	0	0	0	0	0	0	0	0	6	0	0	0	8	0	23	63	18	0
ASV_315	9	12	0	6	8	6	13	8	0	0	10	6	7	7	5	13	0	0	0	0	7	0	0	0	0
ASV_316	0	0	0	0	0	0	0	0	0	0	0	0	0	0	0	0	0	0	6	5	39	0	0	51	15
ASV_317	0	8	0	0	7	0	10	0	8	0	15	23	0	20	11	0	0	0	13	0	0	0	0	0	0
ASV_318	0	0	0	8	16	0	0	0	0	0	18	0	21	19	12	0	0	8	13	0	0	0	0	0	0
ASV_319	0	0	0	0	0	0	0	0	0	0	0	0	0	0	0	14	0	0	0	0	0	0	26	8	67
ASV_320	13	0	0	5	11	0	0	4	0	0	0	4	5	0	5	16	0	0	24	0	0	0	0	0	27
ASV_321	0	0	0	8	0	0	0	0	9	10	0	7	0	0	0	0	0	0	0	0	0	15	36	0	29
ASV_322	0	0	0	7	0	0	0	4	3	0	15	16	16	13	13	7	0	0	19	0	0	0	0	0	0
ASV_323	0	11	0	13	12	0	0	0	0	9	17	9	10	9	10	0	0	0	0	0	12	0	0	0	0
ASV_324	0	6	0	0	0	0	0	0	0	0	0	0	0	0	0	0	0	0	11	0	9	39	0	0	46
ASV_325	0	0	0	0	0	0	0	0	0	0	0	0	0	0	0	0	0	0	17	0	0	0	59	0	34
ASV_326	11	8	6	16	0	0	5	4	3	6	8	4	13	9	4	12	0	0	0	0	0	0	0	0	0
ASV_327	6	11	5	17	8	0	11	7	8	12	0	5	5	0	0	0	14	0	0	0	0	0	0	0	0
ASV_328	0	2	0	0	0	0	0	0	0	0	0	6	0	0	4	0	11	10	19	0	0	26	0	11	20
ASV_329	0	0	0	0	0	0	0	0	0	0	0	0	0	0	0	0	0	0	0	0	0	30	0	41	38
ASV_330	9	6	0	0	8	6	5	0	0	7	21	0	12	0	15	0	0	0	0	0	0	0	0	17	0
ASV_331	0	21	0	20	23	22	0	20	0	0	0	0	0	0	0	0	0	0	0	0	0	0	0	0	0
ASV_332	6	0	9	0	0	5	10	5	0	2	0	21	0	3	8	7	13	0	0	7	9	0	0	0	0
ASV_333	26	0	14	17	21	0	0	0	13	11	0	0	0	0	0	0	0	0	0	0	0	0	0	0	0
ASV_334	6	7	0	0	0	0	0	0	8	0	0	12	0	0	14	16	7	0	0	7	0	25	0	0	0
ASV_335	6	6	7	8	7	0	3	4	0	5	8	14	4	6	9	0	8	6	0	0	0	0	0	0	0
ASV_336	10	4	2	6	0	7	9	6	3	0	6	12	11	6	12	0	0	0	0	0	0	0	0	5	0
ASV_337	0	8	11	0	0	11	12	5	7	7	9	13	0	10	6	0	0	0	0	0	0	0	0	0	0
ASV_338	0	0	4	0	0	18	22	14	0	8	0	0	9	0	12	0	0	0	11	0	0	0	0	0	0
ASV_339	0	0	0	14	7	0	0	0	0	0	0	15	14	14	14	11	0	0	9	0	0	0	0	0	0
ASV_340	0	0	0	0	0	0	0	0	0	0	0	0	0	0	0	0	25	13	13	12	0	35	0	0	0
ASV_341	0	0	0	0	0	0	0	0	0	0	0	0	0	0	0	0	0	0	32	0	0	0	66	0	0
ASV_342	8	0	9	0	8	0	0	0	0	0	14	19	11	12	8	0	0	7	0	0	0	0	0	0	0
ASV_343	6	9	0	7	16	0	0	0	11	0	0	0	12	0	0	0	0	0	0	0	0	0	0	35	0
ASV_344	5	4	8	4	0	5	6	5	2	9	12	7	11	13	5	0	0	0	0	0	0	0	0	0	0
ASV_345	0	9	0	6	7	0	0	0	0	0	0	0	0	0	0	0	0	0	21	0	0	0	0	0	53
ASV_346	0	0	8	0	0	0	6	6	0	5	14	15	16	12	14	0	0	0	0	0	0	0	0	0	0
ASV_347	0	0	0	0	0	0	0	0	0	0	0	0	0	0	0	0	0	0	0	0	0	0	79	17	0
ASV_348	3	8	4	10	0	0	7	6	8	6	0	0	0	0	0	0	0	0	9	9	0	0	25	0	0
ASV_349	0	0	0	0	0	0	0	0	0	0	0	0	0	0	0	0	0	0	0	0	42	37	0	15	0
ASV_350	0	0	0	0	0	0	0	0	0	0	0	0	0	0	0	0	0	0	0	0	0	0	41	16	37
ASV_351	15	14	14	9	0	2	7	5	4	0	0	7	6	0	10	0	0	0	0	0	0	0	0	0	0
ASV_352	0	11	0	0	0	0	0	0	0	8	0	7	9	0	10	0	0	0	0	13	0	0	24	10	0
ASV_353	0	0	0	0	0	0	7	0	0	0	0	0	0	0	0	0	0	0	0	0	7	0	78	0	0
ASV_354	0	0	0	0	0	0	0	0	0	0	0	0	26	0	0	0	0	0	17	0	0	0	49	0	0
ASV_355	4	2	11	5	0	0	8	19	5	13	0	11	2	4	1	0	0	0	0	6	0	0	0	0	0
ASV_356	0	15	12	6	18	0	12	0	0	12	0	0	0	0	0	0	0	0	16	0	0	0	0	0	0
ASV_357	0	4	0	0	0	0	0	0	4	0	0	0	0	5	0	0	19	19	0	18	0	22	0	0	0
ASV_358	0	0	0	0	0	0	0	0	0	0	0	0	0	0	0	0	0	0	0	0	0	33	58	0	0
ASV_359	0	0	20	17	9	0	17	15	0	0	0	0	0	0	12	0	0	0	0	0	0	0	0	0	0
ASV_360	0	0	8	0	0	0	8	0	0	6	9	11	0	0	12	0	0	0	20	0	16	0	0	0	0
ASV_361	8	8	10	11	7	0	13	12	2	6	0	0	7	0	5	0	0	0	0	0	0	0	0	0	0
ASV_362	0	0	0	0	8	0	0	11	0	0	0	0	0	0	7	0	0	0	20	0	8	35	0	0	0
ASV_363	8	5	0	13	6	6	10	0	5	0	0	11	11	0	13	0	0	0	0	0	0	0	0	0	0
ASV_364	6	5	6	5	3	0	2	5	15	4	10	0	11	0	12	0	0	0	4	0	0	0	0	0	0
ASV_365	0	0	0	0	0	0	0	0	0	0	0	0	0	0	0	21	24	13	0	0	12	18	0	0	0
ASV_366	0	0	0	0	0	0	0	0	0	0	0	0	0	0	0	0	18	0	20	29	0	0	0	21	0
ASV_367	9	0	3	7	11	9	11	6	0	0	0	8	0	14	0	0	0	0	9	0	0	0	0	0	0
ASV_368	8	7	11	13	14	14	0	4	0	16	0	0	0	0	0	0	0	0	0	0	0	0	0	0	0
ASV_369	0	0	0	0	0	0	0	0	0	0	0	0	0	0	0	0	0	0	0	4	0	5	4	20	54
ASV_370	11	7	3	9	6	0	6	5	0	7	8	0	8	0	0	0	11	0	0	5	0	0	0	0	0
ASV_371	0	0	0	0	0	0	0	0	0	0	0	0	0	0	0	0	0	0	0	0	0	0	86	0	0
ASV_372	1	3	6	10	0	0	5	3	7	0	9	7	15	15	4	0	0	0	0	0	0	0	0	0	0
ASV_373	0	0	0	49	21	0	0	0	0	15	0	0	0	0	0	0	0	0	0	0	0	0	0	0	0
ASV_374	0	0	0	0	0	0	0	0	0	0	0	0	0	0	0	0	0	0	0	0	17	54	14	0	0
ASV_375	13	14	11	9	0	0	10	0	0	0	0	0	0	0	0	16	11	0	0	0	0	0	0	0	0
ASV_376	5	4	0	3	5	3	6	0	0	0	8	12	7	6	12	0	4	9	0	0	0	0	0	0	0
ASV_377	0	10	0	6	10	0	0	0	0	0	8	19	0	6	8	17	0	0	0	0	0	0	0	0	0
ASV_378	0	0	0	0	11	0	9	0	0	0	0	0	0	0	0	11	15	0	0	0	0	0	0	0	38
ASV_379	5	0	6	5	0	0	8	0	0	4	0	6	5	0	6	14	0	16	0	0	0	8	0	0	0
ASV_380	0	7	6	0	10	0	9	0	8	7	0	15	7	4	0	0	10	0	0	0	0	0	0	0	0
ASV_381	18	0	0	0	0	0	15	0	0	0	17	0	19	0	0	0	0	0	13	0	0	0	0	0	0
ASV_382	0	11	4	0	0	0	0	0	4	0	0	6	0	0	7	8	5	0	13	0	0	0	24	0	0
ASV_383	0	0	16	0	0	0	10	0	0	0	0	13	0	0	0	18	9	0	9	7	0	0	0	0	0
ASV_384	0	0	0	0	0	0	4	0	0	0	0	0	0	0	0	0	0	0	0	0	0	29	0	13	36
ASV_385	11	16	0	0	18	0	20	0	0	0	0	0	0	0	0	0	0	0	0	0	0	16	0	0	0
ASV_386	7	0	12	0	0	7	17	12	0	13	0	0	0	0	0	0	13	0	0	0	0	0	0	0	0
ASV_387	0	9	11	0	0	0	0	9	0	0	11	0	0	5	0	0	0	0	3	0	0	0	0	0	33
ASV_388	0	0	12	0	0	0	0	0	0	0	5	15	8	12	12	0	0	0	0	17	0	0	0	0	0
ASV_389	8	0	12	0	9	0	0	0	0	0	20	0	9	0	0	0	9	0	0	0	13	0	0	0	0
ASV_390	7	0	7	3	6	0	0	0	0	4	3	0	0	0	0	8	0	0	14	0	0	28	0	0	0
ASV_391	6	7	5	10	7	1	9	4	8	0	4	6	8	0	5	0	0	0	0	0	0	0	0	0	0
ASV_392	0	9	9	0	8	10	0	19	0	9	0	8	0	0	8	0	0	0	0	0	0	0	0	0	0
ASV_393	0	0	0	0	8	0	8	7	6	5	10	0	4	0	5	0	0	0	14	0	0	0	0	13	0
ASV_394	0	0	0	0	0	0	0	0	0	0	0	0	0	0	0	0	0	22	9	49	0	0	0	0	0
ASV_395	0	0	0	0	0	0	0	0	0	0	0	0	0	0	0	0	0	14	0	0	0	0	0	42	24
ASV_396	0	10	9	0	8	0	13	0	8	10	0	0	0	0	0	0	0	0	0	0	0	0	0	21	0
ASV_397	0	8	0	7	7	0	0	3	0	12	10	4	6	8	5	0	9	0	0	0	0	0	0	0	0
ASV_398	0	0	0	0	0	0	0	0	0	0	0	0	0	0	0	0	0	0	0	0	0	0	79	0	0
ASV_399	18	17	17	13	0	0	0	13	0	0	0	0	0	0	0	0	0	0	0	0	0	0	0	0	0
ASV_400	0	10	0	0	0	0	13	0	12	12	0	0	14	7	10	0	0	0	0	0	0	0	0	0	0
ASV_401	0	0	0	0	0	0	0	0	0	0	0	0	12	0	11	0	0	8	12	0	0	0	0	0	35
ASV_402	0	0	0	0	0	0	0	0	0	0	0	0	0	0	0	0	0	0	0	0	0	0	0	0	78
ASV_403	14	0	0	17	0	0	0	0	0	0	0	15	0	0	8	0	0	0	0	0	0	0	0	0	23
ASV_404	0	0	0	0	0	0	14	6	0	0	11	17	14	6	9	0	0	0	0	0	0	0	0	0	0
ASV_405	0	0	0	0	0	0	0	6	14	0	15	10	0	11	14	0	0	0	7	0	0	0	0	0	0
ASV_406	0	0	0	0	0	0	0	0	0	0	0	0	0	0	0	0	0	0	0	0	16	0	42	19	0
ASV_407	0	0	0	0	0	0	0	0	0	0	0	0	0	0	0	0	0	0	0	0	9	34	34	0	0
ASV_408	6	0	5	17	0	12	0	15	0	8	0	4	0	0	9	0	0	0	0	0	0	0	0	0	0
ASV_409	0	0	0	0	11	0	9	0	0	0	10	10	11	12	9	0	0	4	0	0	0	0	0	0	0
ASV_410	0	0	0	0	0	0	0	0	0	0	0	0	0	0	0	0	0	0	0	23	0	0	53	0	0
ASV_411	0	0	0	0	0	0	0	0	0	0	0	0	0	0	0	0	0	0	0	0	17	0	59	0	0
ASV_412	0	0	0	0	0	0	0	0	0	0	0	0	0	0	0	0	0	0	0	0	0	15	21	18	22
ASV_413	0	0	6	0	13	7	0	0	0	6	0	13	9	14	7	0	0	0	0	0	0	0	0	0	0
ASV_414	0	0	0	11	0	0	0	0	0	0	10	0	0	0	16	0	8	0	18	12	0	0	0	0	0
ASV_415	0	0	0	0	0	0	0	0	0	0	3	0	0	0	0	0	0	0	0	9	23	0	0	0	40
ASV_416	5	0	0	0	0	0	0	0	0	0	10	0	0	15	14	11	0	0	0	0	0	0	0	19	0
ASV_417	0	0	0	0	0	0	0	0	0	0	4	7	7	0	0	0	13	10	0	0	0	5	0	0	28
ASV_418	0	0	0	0	0	0	0	0	0	0	0	0	0	0	0	0	0	0	0	0	0	9	58	7	0
ASV_419	0	0	0	19	10	14	11	0	0	6	0	0	0	0	0	0	0	0	0	13	0	0	0	0	0
ASV_420	0	0	0	0	0	0	0	0	0	0	0	0	0	0	0	14	0	0	0	10	0	0	0	17	32
ASV_421	0	0	0	0	0	0	0	0	0	0	0	0	0	0	0	0	0	0	0	0	0	0	35	38	0
ASV_422	3	6	1	4	5	3	4	2	6	0	0	4	6	6	10	0	0	0	0	12	0	0	0	0	0
ASV_423	0	8	0	0	0	0	13	0	0	10	4	9	0	0	10	0	0	0	0	18	0	0	0	0	0
ASV_424	0	7	0	0	10	0	0	0	0	0	0	0	0	0	0	9	0	11	0	0	12	0	0	0	23
ASV_425	0	0	0	0	0	0	0	0	0	0	0	0	0	0	0	0	0	0	13	0	0	0	59	0	0
ASV_426	0	0	0	0	0	0	0	0	0	0	0	0	0	0	0	0	0	0	0	0	0	0	72	0	0
ASV_427	10	0	8	7	16	6	0	7	0	0	9	8	0	0	0	0	0	0	0	0	0	0	0	0	0
ASV_428	7	0	0	9	0	0	0	0	9	0	0	0	5	6	0	12	0	0	0	7	0	0	0	0	16
ASV_429	0	9	8	0	14	0	11	10	0	7	0	0	6	0	6	0	0	0	0	0	0	0	0	0	0
ASV_430	0	0	0	0	0	0	0	0	0	0	0	0	0	0	0	0	9	0	0	0	0	0	31	0	31
ASV_431	0	0	0	0	0	0	0	0	0	0	0	0	0	0	0	0	0	0	0	0	0	0	71	0	0
ASV_432	9	6	0	0	9	0	10	17	7	0	0	9	0	0	0	0	0	0	3	0	0	0	0	0	0
ASV_433	0	0	0	0	0	0	0	4	0	0	0	0	0	0	0	0	0	0	0	0	0	0	66	0	0
ASV_434	0	0	0	0	0	0	0	0	0	0	0	6	0	0	0	0	0	0	0	0	0	0	64	0	0
ASV_435	0	0	0	0	0	0	0	0	0	0	0	0	0	0	0	0	0	0	0	0	0	0	26	15	29
ASV_436	14	0	10	14	8	0	0	0	0	0	0	0	13	0	10	0	0	0	0	0	0	0	0	0	0
ASV_437	12	0	1	0	2	0	3	6	0	6	0	6	10	3	2	18	0	0	0	0	0	0	0	0	0
ASV_438	11	14	0	0	7	0	4	0	0	0	0	0	5	0	5	16	0	7	0	0	0	0	0	0	0
ASV_439	7	0	0	0	8	0	0	0	0	0	0	7	12	17	11	0	7	0	0	0	0	0	0	0	0
ASV_440	0	0	0	9	0	0	0	0	0	0	0	16	0	0	16	0	0	0	0	0	0	0	0	0	28
ASV_441	0	0	0	0	0	0	0	0	0	0	0	0	0	0	0	0	0	0	0	0	0	0	47	0	22
ASV_442	8	0	0	7	0	0	0	4	8	0	7	0	7	7	9	0	0	11	0	0	0	0	0	0	0
ASV_443	0	0	0	0	0	0	0	0	0	0	0	0	0	0	0	0	0	0	0	0	0	29	0	0	39
ASV_444	25	0	0	0	0	0	0	0	0	0	0	0	0	0	33	0	0	0	0	9	0	0	0	0	0
ASV_445	16	0	0	0	0	0	0	0	0	0	0	0	0	0	0	0	17	13	21	0	0	0	0	0	0
ASV_446	3	0	13	11	14	0	6	5	0	8	0	0	0	7	0	0	0	0	0	0	0	0	0	0	0
ASV_447	3	5	2	0	0	5	12	7	12	4	1	1	2	1	3	0	0	0	9	0	0	0	0	0	0
ASV_448	0	12	16	0	0	0	16	0	0	4	9	0	10	0	0	0	0	0	0	0	0	0	0	0	0
ASV_449	0	9	13	0	0	0	0	0	0	0	0	0	0	15	9	16	5	0	0	0	0	0	0	0	0
ASV_450	0	0	20	0	0	0	0	11	18	18	0	0	0	0	0	0	0	0	0	0	0	0	0	0	0
ASV_451	0	0	12	0	11	9	7	0	0	11	8	0	9	0	0	0	0	0	0	0	0	0	0	0	0
ASV_452	0	0	8	6	4	0	0	4	0	0	0	5	5	0	6	6	0	6	13	4	0	0	0	0	0
ASV_453	0	0	0	0	0	0	0	0	0	0	11	0	0	7	0	19	14	16	0	0	0	0	0	0	0
ASV_454	0	0	0	0	0	0	0	0	0	0	0	0	0	0	0	0	32	0	15	20	0	0	0	0	0
ASV_455	0	0	0	0	0	0	0	0	0	0	0	0	0	0	0	0	0	6	0	0	0	0	0	0	61
ASV_456	10	5	0	0	13	0	0	0	0	0	13	6	1	5	4	0	0	0	9	0	0	0	0	0	0
ASV_457	0	7	0	5	8	0	0	0	0	2	8	13	6	4	13	0	0	0	0	0	0	0	0	0	0
ASV_458	0	0	7	0	0	0	7	0	0	0	0	6	0	8	16	0	0	0	0	0	0	0	0	22	0
ASV_459	0	0	0	0	11	0	16	0	0	0	0	0	0	0	0	0	0	0	0	0	0	0	39	0	0
ASV_460	0	0	0	0	0	0	8	0	0	0	0	0	0	0	0	0	0	0	0	0	0	22	36	0	0
ASV_461	0	0	0	0	0	0	0	0	0	0	0	0	0	13	0	6	0	0	0	0	0	0	47	0	0
ASV_462	0	0	0	0	0	0	0	0	0	0	0	0	0	0	0	0	0	21	13	0	9	0	23	0	0
ASV_463	5	0	0	0	0	0	0	0	0	0	0	0	0	0	0	14	0	0	0	12	0	0	0	0	34
ASV_464	0	9	6	0	0	0	10	0	0	5	0	0	13	0	0	0	14	8	0	0	0	0	0	0	0
ASV_465	0	0	0	0	8	0	0	0	0	0	0	0	0	0	4	12	0	0	23	0	0	0	0	18	0
ASV_466	0	0	0	0	0	0	7	7	0	0	9	6	12	12	2	1	6	0	0	3	0	0	0	0	0
ASV_467	0	0	0	0	0	0	0	0	0	0	0	0	0	0	0	0	30	0	0	17	0	0	0	18	0
ASV_468	0	17	0	0	10	0	0	0	0	21	0	0	0	16	0	0	0	0	0	0	0	0	0	0	0
ASV_469	0	4	6	0	5	0	4	0	7	0	11	7	10	0	10	0	0	0	0	0	0	0	0	0	0
ASV_470	0	0	0	0	0	0	0	0	0	0	0	17	12	13	17	0	0	0	0	0	0	0	0	5	0
ASV_471	0	0	0	0	0	0	0	0	0	0	0	0	0	0	0	0	0	0	0	0	0	13	51	0	0
ASV_472	0	0	0	11	13	0	0	0	0	9	0	19	0	0	0	0	0	0	0	0	11	0	0	0	0
ASV_473	0	0	0	0	0	0	0	0	0	10	0	0	0	0	0	0	0	0	0	12	0	17	0	0	24
ASV_474	0	0	0	0	0	0	0	0	0	0	0	0	0	0	0	0	0	0	0	0	36	0	0	27	0
ASV_475	0	0	0	0	0	0	0	0	0	0	0	0	0	0	0	0	0	0	0	0	0	0	63	0	0
ASV_476	7	0	11	0	0	0	0	0	0	0	13	8	11	0	0	0	0	5	0	7	0	0	0	0	0
ASV_477	0	0	14	0	0	0	14	0	0	0	6	0	0	0	0	0	0	0	0	0	0	0	0	28	0
ASV_478	0	0	0	0	0	0	0	0	0	0	7	0	0	0	0	0	0	0	0	0	13	14	0	0	28
ASV_479	0	0	0	0	0	0	0	0	0	0	0	0	0	0	0	17	0	0	0	0	0	0	0	0	45
ASV_480	0	0	0	0	0	0	0	0	0	0	0	0	0	0	0	0	23	20	10	9	0	0	0	0	0
ASV_481	9	3	7	0	0	0	6	0	0	16	0	6	5	1	6	0	1	1	0	0	0	0	0	0	0
ASV_482	8	0	0	0	9	0	9	0	0	0	13	12	0	10	0	0	0	0	0	0	0	0	0	0	0
ASV_483	0	10	6	14	12	6	0	0	0	0	0	0	0	0	0	0	9	0	0	4	0	0	0	0	0
ASV_484	0	7	0	0	8	0	7	0	0	0	0	0	6	0	0	20	0	0	13	0	0	0	0	0	0
ASV_485	0	0	0	0	4	0	0	0	0	0	0	0	0	0	0	0	0	0	13	0	0	44	0	0	0
ASV_486	0	0	0	0	0	7	0	0	0	0	14	0	0	0	17	0	0	0	23	0	0	0	0	0	0
ASV_487	0	0	0	0	0	0	0	0	0	0	0	0	0	0	0	0	0	0	15	0	0	0	0	24	22
ASV_488	0	0	0	0	0	0	0	0	0	0	0	0	0	0	0	0	0	0	14	0	0	11	0	0	36
ASV_489	0	0	0	0	0	0	0	0	0	0	0	0	0	0	0	0	0	0	0	0	0	0	0	0	61
ASV_490	1	7	0	0	0	0	0	0	0	0	0	0	0	0	0	7	7	0	0	12	14	0	0	12	0
ASV_491	0	19	21	0	0	9	0	11	0	0	0	0	0	0	0	0	0	0	0	0	0	0	0	0	0
ASV_492	0	0	0	0	0	9	17	9	0	0	0	9	0	0	0	0	0	0	0	0	0	0	0	16	0
ASV_493	0	0	0	0	0	0	0	0	0	0	0	0	0	0	0	0	0	0	0	31	0	29	0	0	0
ASV_494	0	0	0	4	0	0	0	0	0	0	0	5	0	4	0	4	0	7	0	11	0	24	0	0	0
ASV_495	0	0	0	0	0	0	0	0	0	0	0	0	0	0	0	0	0	0	59	0	0	0	0	0	0
ASV_496	0	0	0	0	0	0	0	0	0	0	0	0	0	0	0	0	0	0	0	17	0	0	42	0	0
ASV_497	11	0	0	0	7	0	0	0	0	0	0	0	0	0	0	0	0	17	11	0	12	0	0	0	0
ASV_498	7	11	8	7	0	0	7	0	8	10	0	0	0	0	0	0	0	0	0	0	0	0	0	0	0
ASV_499	3	3	4	4	2	0	3	1	0	0	7	4	3	0	2	14	0	0	0	0	8	0	0	0	0
ASV_500	1	8	6	7	9	6	3	4	0	9	2	1	0	0	2	0	0	0	0	0	0	0	0	0	0
ASV_501	0	0	0	0	0	0	0	6	0	0	0	0	0	0	0	0	3	0	0	0	0	0	49	0	0
ASV_502	0	0	0	0	0	0	0	0	0	0	0	0	0	0	0	0	0	0	0	0	0	19	0	0	39
ASV_503	0	0	0	0	0	0	0	0	0	0	0	0	0	0	0	0	0	0	0	0	0	0	58	0	0
ASV_504	16	0	11	0	18	0	0	0	0	12	0	0	0	0	0	0	0	0	0	0	0	0	0	0	0
ASV_505	11	6	9	17	0	0	0	0	0	7	7	0	0	0	0	0	0	0	0	0	0	0	0	0	0
ASV_506	9	0	0	10	8	0	0	0	0	0	0	15	0	0	7	0	0	0	0	8	0	0	0	0	0
ASV_507	5	7	0	9	8	0	8	0	0	0	0	8	0	12	0	0	0	0	0	0	0	0	0	0	0
ASV_508	3	4	0	0	1	16	0	0	0	0	27	1	3	0	0	0	2	0	0	0	0	0	0	0	0
ASV_509	0	7	0	0	7	0	0	0	9	5	3	0	0	4	9	0	13	0	0	0	0	0	0	0	0
ASV_510	0	0	0	0	0	0	0	0	0	0	0	0	0	0	0	13	24	0	20	0	0	0	0	0	0
ASV_511	0	0	0	0	0	0	0	0	0	0	0	0	0	0	0	0	6	0	0	51	0	0	0	0	0
ASV_512	10	0	6	6	0	0	0	7	10	0	0	0	0	6	6	0	5	0	0	0	0	0	0	0	0
ASV_513	0	12	0	0	0	0	15	0	19	0	0	0	0	10	0	0	0	0	0	0	0	0	0	0	0
ASV_514	0	11	10	0	12	0	13	0	0	0	0	10	0	0	0	0	0	0	0	0	0	0	0	0	0
ASV_515	0	8	0	3	0	0	9	0	0	0	0	0	0	9	0	0	7	0	0	0	0	20	0	0	0
ASV_516	0	0	0	0	0	0	13	0	0	0	0	24	0	0	19	0	0	0	0	0	0	0	0	0	0
ASV_517	9	0	0	14	0	0	0	0	0	0	0	11	6	0	15	0	0	0	0	0	0	0	0	0	0
ASV_518	6	5	6	0	6	0	0	0	0	8	0	10	4	0	0	10	0	0	0	0	0	0	0	0	0
ASV_519	0	1	2	7	4	4	0	7	2	3	1	9	8	0	7	0	0	0	0	0	0	0	0	0	0
ASV_520	0	0	8	15	0	0	10	0	0	0	0	0	0	0	0	0	0	0	0	0	22	0	0	0	0
ASV_521	0	0	0	0	0	0	14	18	0	0	0	0	0	0	0	0	0	0	0	0	0	0	0	23	0
ASV_522	0	0	0	0	0	0	0	0	0	0	18	0	12	0	0	11	0	0	0	14	0	0	0	0	0
ASV_523	0	0	0	0	0	0	0	0	0	0	0	0	0	0	0	12	29	0	14	0	0	0	0	0	0
ASV_524	0	0	0	0	0	0	0	0	0	0	0	0	0	0	0	0	0	0	0	0	0	0	0	0	55
ASV_525	5	6	6	9	0	0	0	6	7	0	4	5	0	0	0	0	0	0	6	0	0	0	0	0	0
ASV_526	0	11	0	0	0	0	12	0	0	0	0	10	13	0	8	0	0	0	0	0	0	0	0	0	0
ASV_527	0	0	0	0	13	0	0	9	0	0	0	0	0	0	8	0	0	14	10	0	0	0	0	0	0
ASV_528	9	0	0	0	0	0	0	4	0	0	0	5	5	8	6	16	0	0	0	0	0	0	0	0	0
ASV_529	5	0	0	0	5	0	5	0	0	5	5	1	6	7	7	0	0	0	6	0	0	1	0	0	0
ASV_530	1	11	0	0	7	0	0	7	0	8	5	9	1	0	0	0	0	4	0	0	0	0	0	0	0
ASV_531	0	8	0	0	9	0	0	0	5	0	0	0	0	0	0	0	0	0	0	0	0	0	0	0	31
ASV_532	0	2	6	1	3	2	6	2	6	3	5	1	3	4	3	0	0	4	0	0	0	2	0	0	0
ASV_533	0	0	0	0	0	0	0	0	0	0	0	0	0	0	0	23	0	0	30	0	0	0	0	0	0
ASV_534	0	0	0	0	0	0	0	0	0	0	0	0	0	0	0	0	0	0	0	6	0	0	0	0	47
ASV_535	0	0	0	0	0	0	0	0	0	0	0	0	0	0	0	0	0	0	0	0	0	0	0	0	53
ASV_536	6	0	0	0	0	0	14	0	0	0	0	0	0	0	0	11	0	0	0	0	0	21	0	0	0
ASV_537	3	6	5	3	2	4	4	2	2	0	7	0	0	6	4	0	4	0	0	0	0	0	0	0	0
ASV_538	0	0	0	9	11	0	0	0	0	0	12	0	0	7	0	0	0	0	13	0	0	0	0	0	0
ASV_539	0	0	0	0	0	0	5	3	0	0	0	0	0	8	0	0	7	0	0	6	0	0	23	0	0
ASV_540	0	0	0	0	0	0	0	4	0	0	0	0	0	0	0	0	0	0	0	0	0	0	48	0	0
ASV_541	0	0	0	0	0	0	0	0	0	0	9	0	8	0	0	5	0	0	0	0	0	30	0	0	0
ASV_542	0	0	0	0	0	0	0	0	0	0	0	0	0	0	0	0	0	0	6	0	0	0	0	0	46
ASV_543	0	0	0	0	0	0	0	0	0	0	0	0	0	0	0	0	0	0	0	0	0	29	0	0	23
ASV_544	19	0	0	16	16	0	0	0	0	0	0	0	0	0	0	0	0	0	0	0	0	0	0	0	0
ASV_545	4	3	6	6	4	0	0	3	4	0	5	4	7	0	0	0	0	0	5	0	0	0	0	0	0
ASV_546	0	0	9	0	0	0	4	0	0	0	0	0	12	12	14	0	0	0	0	0	0	0	0	0	0
ASV_547	0	0	0	16	6	0	29	0	0	0	0	0	0	0	0	0	0	0	0	0	0	0	0	0	0
ASV_548	0	0	0	0	15	0	0	0	0	0	0	0	14	12	0	0	10	0	0	0	0	0	0	0	0
ASV_549	0	0	0	0	4	0	0	0	0	3	0	0	8	0	0	0	0	0	11	0	0	25	0	0	0
ASV_550	0	0	0	0	0	0	0	0	0	0	0	6	11	7	6	0	7	0	0	0	0	0	0	14	0
ASV_551	0	0	0	0	0	0	0	0	0	0	0	0	0	0	0	23	5	0	15	8	0	0	0	0	0
ASV_552	0	0	0	0	0	0	0	0	0	0	0	0	0	0	0	0	13	0	38	0	0	0	0	0	0
ASV_553	0	0	0	0	0	0	0	0	0	0	0	0	0	0	0	0	0	0	0	10	0	0	0	0	41
ASV_554	0	0	0	0	0	0	0	0	0	0	0	0	0	0	0	0	0	0	0	0	0	0	0	0	51
ASV_555	11	0	12	0	0	0	9	0	0	8	5	5	0	0	0	0	0	0	0	0	0	0	0	0	0
ASV_556	6	7	0	0	0	0	9	0	0	4	0	0	0	0	0	12	0	12	0	0	0	0	0	0	0
ASV_557	0	10	6	16	1	0	1	0	1	2	0	0	0	0	13	0	0	0	0	0	0	0	0	0	0
ASV_558	0	10	0	0	0	0	7	0	0	0	0	0	0	0	0	20	0	0	0	0	0	0	0	13	0
ASV_559	0	7	0	5	1	0	10	0	0	0	9	13	5	0	0	0	0	0	0	0	0	0	0	0	0
ASV_560	0	6	0	0	7	0	0	0	7	5	2	0	6	0	0	0	9	8	0	0	0	0	0	0	0
ASV_561	0	5	8	8	8	0	12	0	5	4	0	0	0	0	0	0	0	0	0	0	0	0	0	0	0
ASV_562	0	0	0	0	0	0	0	0	0	0	0	0	15	11	11	0	0	0	0	0	0	0	0	13	0
ASV_563	0	0	0	0	0	0	0	0	0	0	0	0	0	0	50	0	0	0	0	0	0	0	0	0	0
ASV_564	0	0	0	0	0	0	0	0	0	0	0	0	0	0	0	0	12	0	0	0	0	0	0	0	38
ASV_565	0	0	0	0	0	0	0	0	0	0	0	0	0	0	0	0	0	0	20	0	0	0	0	0	30
ASV_566	7	0	0	0	6	0	13	0	0	4	6	0	0	0	0	0	0	0	0	8	5	0	0	0	0
ASV_567	5	9	0	7	6	0	0	0	0	0	11	11	0	0	0	0	0	0	0	0	0	0	0	0	0
ASV_568	0	0	9	0	0	0	0	0	0	11	0	0	4	0	0	0	25	0	0	0	0	0	0	0	0
ASV_569	0	0	0	0	0	0	0	0	0	0	0	0	0	0	0	0	0	0	0	0	24	25	0	0	0
ASV_570	0	0	0	0	0	0	0	0	0	0	0	0	0	0	0	0	0	0	0	0	0	0	49	0	0
ASV_571	0	0	0	0	0	0	0	0	0	0	0	0	0	0	0	0	0	0	0	0	0	0	0	0	49
ASV_572	13	0	8	15	0	0	0	12	0	0	0	0	0	0	0	0	0	0	0	0	0	0	0	0	0
ASV_573	8	0	0	5	2	0	5	0	10	0	3	4	2	6	2	0	0	0	0	1	0	0	0	0	0
ASV_574	3	5	2	0	0	0	5	0	0	0	0	7	0	0	6	8	0	0	12	0	0	0	0	0	0
ASV_575	0	2	1	0	1	0	0	5	12	0	0	9	5	0	8	0	0	5	0	0	0	0	0	0	0
ASV_576	0	0	0	0	0	0	0	0	0	2	0	0	0	0	0	0	0	0	0	0	0	21	0	0	25
ASV_577	0	0	0	0	0	0	0	0	0	0	0	5	0	0	0	0	0	0	0	8	0	0	0	0	35
ASV_578	0	0	0	0	0	0	0	0	0	0	0	0	0	0	0	0	41	0	0	0	7	0	0	0	0
ASV_579	0	0	0	0	0	0	0	0	0	0	0	0	0	0	0	0	11	0	0	0	11	0	0	0	26
ASV_580	0	0	0	0	0	0	0	0	0	0	0	0	0	0	0	0	0	0	0	0	23	14	0	11	0
ASV_581	0	0	0	0	0	0	0	0	0	0	0	0	0	0	0	0	0	0	0	0	11	0	0	7	30
ASV_582	0	0	0	0	0	0	0	0	0	0	0	0	0	0	0	0	0	0	0	0	0	18	0	0	30
ASV_583	0	0	0	0	0	0	0	0	0	0	0	0	0	0	0	0	0	0	0	0	0	0	0	0	48
ASV_584	9	0	9	0	0	0	0	0	0	0	10	4	10	0	5	0	0	0	0	0	0	0	0	0	0
ASV_585	0	24	0	0	0	0	0	0	0	0	0	0	0	0	0	0	0	10	0	0	13	0	0	0	0
ASV_586	0	13	0	0	0	0	0	17	0	0	0	0	0	0	11	0	0	6	0	0	0	0	0	0	0
ASV_587	0	6	0	0	0	0	11	0	0	0	0	0	17	13	0	0	0	0	0	0	0	0	0	0	0
ASV_588	0	0	8	0	0	0	3	0	0	7	0	0	8	9	12	0	0	0	0	0	0	0	0	0	0
ASV_589	0	0	6	7	5	0	0	0	4	4	0	5	0	0	3	0	0	0	0	13	0	0	0	0	0
ASV_590	0	0	0	16	0	0	0	0	0	0	0	0	0	0	0	31	0	0	0	0	0	0	0	0	0
ASV_591	0	0	0	0	0	0	0	0	0	0	0	0	0	0	0	0	0	0	0	0	0	0	47	0	0
ASV_592	10	8	0	0	10	0	0	0	0	0	0	0	6	0	10	2	0	0	0	0	0	0	0	0	0
ASV_593	0	1	3	0	0	0	8	10	11	11	0	0	0	2	0	0	0	0	0	0	0	0	0	0	0
ASV_594	0	0	0	0	9	0	0	0	6	0	0	10	0	0	13	0	8	0	0	0	0	0	0	0	0
ASV_595	0	0	0	0	0	0	0	0	0	0	0	0	0	46	0	0	0	0	0	0	0	0	0	0	0
ASV_596	0	0	0	0	0	0	0	0	0	0	0	0	0	0	0	0	0	16	0	0	11	19	0	0	0
ASV_597	0	0	0	0	0	0	0	0	0	0	0	0	0	0	0	0	0	0	0	0	0	0	0	0	46
ASV_598	0	0	0	0	0	0	0	0	0	0	0	0	0	0	0	0	0	0	0	0	0	0	0	0	46
ASV_599	2	1	0	0	0	7	6	6	0	4	0	5	6	8	0	0	0	0	0	0	0	0	0	0	0
ASV_600	0	0	8	0	0	0	0	7	0	0	0	0	0	0	30	0	0	0	0	0	0	0	0	0	0
ASV_601	0	0	0	0	0	0	0	0	0	0	0	0	0	0	0	9	11	0	0	14	11	0	0	0	0
ASV_602	0	0	0	0	0	0	0	0	0	0	0	0	0	0	0	0	0	0	0	0	0	0	45	0	0
ASV_603	0	0	0	0	0	0	0	0	0	0	0	0	0	0	0	0	0	0	0	0	0	0	45	0	0
ASV_604	0	0	0	0	0	0	0	0	0	0	0	0	0	0	0	0	0	0	0	0	0	0	0	0	45
ASV_605	5	2	8	0	4	0	5	10	0	0	0	2	1	0	2	4	0	1	0	0	0	0	0	0	0
ASV_606	4	0	3	0	0	0	0	0	7	0	0	0	0	5	0	0	0	9	0	0	0	0	0	16	0
ASV_607	4	0	0	0	5	5	4	0	0	5	6	0	7	5	0	0	0	0	3	0	0	0	0	0	0
ASV_608	0	5	1	0	0	4	0	2	8	7	10	1	2	4	0	0	0	0	0	0	0	0	0	0	0
ASV_609	0	0	5	9	0	0	0	0	0	0	0	10	0	9	0	0	11	0	0	0	0	0	0	0	0
ASV_610	0	0	0	7	0	0	0	0	0	0	0	0	0	0	0	0	0	0	0	10	0	0	0	27	0
ASV_611	0	0	0	0	4	0	6	0	7	0	0	0	0	0	0	0	0	0	0	27	0	0	0	0	0
ASV_612	0	0	0	0	0	0	0	8	5	0	0	0	0	0	0	0	4	0	0	0	0	27	0	0	0
ASV_613	0	0	0	0	0	0	0	0	0	0	14	0	0	19	0	0	11	0	0	0	0	0	0	0	0
ASV_614	0	0	0	0	0	0	0	0	0	0	0	0	0	0	0	0	19	0	0	0	0	0	0	0	25
ASV_615	0	0	0	0	0	0	0	0	0	0	0	0	0	0	0	0	10	12	10	12	0	0	0	0	0
ASV_616	0	0	0	0	0	0	0	0	0	0	0	0	0	0	0	0	0	12	0	23	0	0	9	0	0
ASV_617	0	0	0	0	0	0	0	0	0	0	0	0	0	0	0	0	0	0	27	17	0	0	0	0	0
ASV_618	0	0	0	0	0	0	0	0	0	0	0	0	0	0	0	0	0	0	0	0	0	0	44	0	0
ASV_619	0	0	0	0	0	0	0	0	0	0	0	0	0	0	0	0	0	0	0	0	0	0	44	0	0
ASV_620	0	0	0	0	0	0	0	0	0	0	0	0	0	0	0	0	0	0	0	0	0	0	44	0	0
ASV_621	0	0	0	0	0	0	0	0	0	0	0	0	0	0	0	0	0	0	0	0	0	0	0	0	44
ASV_622	3	5	0	0	0	0	0	0	3	0	7	6	3	8	8	0	0	0	0	0	0	0	0	0	0
ASV_623	0	0	5	0	0	0	0	0	0	0	0	14	13	5	0	6	0	0	0	0	0	0	0	0	0
ASV_624	0	0	0	3	0	0	0	0	0	0	0	0	0	0	0	0	0	0	0	0	12	28	0	0	0
ASV_625	0	0	0	0	11	0	0	0	11	0	0	0	0	10	6	0	0	0	5	0	0	0	0	0	0
ASV_626	0	0	0	0	10	0	0	4	0	0	6	9	6	0	8	0	0	0	0	0	0	0	0	0	0
ASV_627	0	0	0	0	9	0	0	0	0	7	0	5	16	0	6	0	0	0	0	0	0	0	0	0	0
ASV_628	0	0	0	0	6	0	8	0	0	0	0	10	8	0	11	0	0	0	0	0	0	0	0	0	0
ASV_629	0	0	0	0	0	0	29	0	0	0	0	0	0	0	0	0	0	0	0	14	0	0	0	0	0
ASV_630	0	0	0	0	0	0	0	0	0	5	0	11	0	0	11	0	0	0	16	0	0	0	0	0	0
ASV_631	0	0	0	0	0	0	0	0	0	0	0	0	12	8	7	0	0	0	16	0	0	0	0	0	0
ASV_632	0	0	0	0	0	0	0	0	0	0	0	0	0	0	0	0	17	0	0	0	0	26	0	0	0
ASV_633	0	0	0	0	0	0	0	0	0	0	0	0	0	0	0	0	15	0	0	0	0	0	0	0	28
ASV_634	0	0	0	0	0	0	0	0	0	0	0	0	0	0	0	0	11	0	0	0	0	0	0	0	32
ASV_635	0	0	0	0	0	0	0	0	0	0	0	0	0	0	0	0	0	0	14	29	0	0	0	0	0
ASV_636	0	0	0	0	0	0	0	0	0	0	0	0	0	0	0	0	0	0	10	10	23	0	0	0	0
ASV_637	0	0	0	0	0	0	0	0	0	0	0	0	0	0	0	0	0	0	0	0	9	0	20	5	9
ASV_638	0	0	0	0	0	0	0	0	0	0	0	0	0	0	0	0	0	0	0	0	0	0	43	0	0
ASV_639	0	0	0	0	0	0	0	0	0	0	0	0	0	0	0	0	0	0	0	0	0	0	43	0	0
ASV_640	0	0	0	0	0	0	0	0	0	0	0	0	0	0	0	0	0	0	0	0	0	0	0	0	43
ASV_641	0	0	0	0	0	0	0	0	0	0	0	0	0	0	0	0	0	0	0	0	0	0	0	0	43
ASV_642	0	0	0	0	0	0	0	0	0	0	0	0	0	0	0	0	0	0	0	0	0	0	0	0	43
ASV_643	8	0	0	0	0	0	0	0	0	6	0	4	0	0	0	0	0	0	0	0	0	4	0	20	0
ASV_644	0	2	7	5	6	0	0	3	3	6	4	1	0	4	0	0	0	0	1	0	0	0	0	0	0
ASV_645	0	0	0	0	0	0	0	0	0	0	0	0	0	15	8	0	0	0	0	0	0	0	0	0	19
ASV_646	0	0	0	0	0	0	0	0	0	0	0	0	0	0	10	0	0	0	12	0	0	20	0	0	0
ASV_647	0	0	0	0	0	0	0	0	0	0	0	0	0	0	0	0	8	8	0	0	0	13	0	0	13
ASV_648	0	0	0	0	0	0	0	0	0	0	0	0	0	0	0	0	0	0	0	0	0	42	0	0	0
ASV_649	0	0	0	0	0	0	0	0	0	0	0	0	0	0	0	0	0	0	0	0	0	0	42	0	0
ASV_650	0	0	0	0	0	0	0	0	0	0	0	0	0	0	0	0	0	0	0	0	0	0	42	0	0
ASV_651	0	0	0	0	0	0	0	0	0	0	0	0	0	0	0	0	0	0	0	0	0	0	42	0	0
ASV_652	0	0	0	0	0	0	0	0	0	0	0	0	0	0	0	0	0	0	0	0	0	0	42	0	0
ASV_653	0	0	0	0	0	0	0	0	0	0	0	0	0	0	0	0	0	0	0	0	0	0	0	0	42
ASV_654	9	0	0	0	0	0	12	0	0	0	0	0	0	0	0	0	0	0	0	20	0	0	0	0	0
ASV_655	8	0	0	0	0	0	0	8	0	0	0	11	0	7	7	0	0	0	0	0	0	0	0	0	0
ASV_656	0	0	10	0	0	0	6	5	0	3	2	1	2	1	1	0	0	10	0	0	0	0	0	0	0
ASV_657	0	0	4	8	9	4	8	0	0	8	0	0	0	0	0	0	0	0	0	0	0	0	0	0	0
ASV_658	0	0	0	0	0	0	5	0	0	0	6	0	7	0	9	0	0	6	0	0	0	0	0	8	0
ASV_659	0	0	0	0	0	0	0	0	0	0	0	0	0	0	16	0	0	0	0	8	0	0	0	17	0
ASV_660	0	0	0	0	0	0	0	0	0	0	0	0	0	0	0	19	0	0	0	0	0	0	0	0	22
ASV_661	0	0	0	0	0	0	0	0	0	0	0	0	0	0	0	0	13	10	0	0	0	18	0	0	0
ASV_662	0	0	0	0	0	0	0	0	0	0	0	0	0	0	0	0	0	0	0	0	0	23	18	0	0
ASV_663	0	0	0	0	0	0	0	0	0	0	0	0	0	0	0	0	0	0	0	0	0	0	41	0	0
ASV_664	0	0	0	0	0	0	0	0	0	0	0	0	0	0	0	0	0	0	0	0	0	0	41	0	0
ASV_665	0	0	0	0	0	0	0	0	0	0	0	0	0	0	0	0	0	0	0	0	0	0	0	41	0
ASV_666	0	0	0	0	0	0	0	0	0	0	0	0	0	0	0	0	0	0	0	0	0	0	0	41	0
ASV_667	0	0	0	0	0	0	0	0	0	0	0	0	0	0	0	0	0	0	0	0	0	0	0	18	23
ASV_668	0	0	0	0	0	0	0	0	0	0	0	0	0	0	0	0	0	0	0	0	0	0	0	0	41
ASV_669	0	0	0	0	0	0	0	0	0	0	0	0	0	0	0	0	0	0	0	0	0	0	0	0	41
ASV_670	0	0	0	0	0	0	0	0	0	0	0	0	0	0	0	0	0	0	0	0	0	0	0	0	41
ASV_671	15	0	0	0	10	0	0	0	0	0	0	0	0	0	0	0	0	0	0	0	15	0	0	0	0
ASV_672	13	0	0	0	14	0	13	0	0	0	0	0	0	0	0	0	0	0	0	0	0	0	0	0	0
ASV_673	12	17	0	0	0	0	11	0	0	0	0	0	0	0	0	0	0	0	0	0	0	0	0	0	0
ASV_674	5	7	4	0	1	0	5	0	0	0	0	9	0	8	1	0	0	0	0	0	0	0	0	0	0
ASV_675	4	1	0	0	9	0	5	0	0	4	4	4	0	6	2	0	0	0	0	0	0	1	0	0	0
ASV_676	0	11	5	0	0	0	0	0	0	0	0	12	0	12	0	0	0	0	0	0	0	0	0	0	0
ASV_677	0	10	0	0	0	0	0	0	0	0	10	0	0	0	13	7	0	0	0	0	0	0	0	0	0
ASV_678	0	0	7	11	0	7	9	0	0	0	0	6	0	0	0	0	0	0	0	0	0	0	0	0	0
ASV_679	0	0	6	0	0	0	5	0	0	4	0	4	0	5	0	16	0	0	0	0	0	0	0	0	0
ASV_680	0	0	0	10	0	0	5	9	0	4	0	4	0	0	0	0	0	8	0	0	0	0	0	0	0
ASV_681	0	0	0	8	5	0	0	0	0	0	5	5	8	0	0	0	0	0	0	9	0	0	0	0	0
ASV_682	0	0	0	0	0	0	8	0	0	0	0	0	0	0	0	0	0	0	0	0	0	32	0	0	0
ASV_683	0	0	0	0	0	0	7	5	0	10	2	7	2	1	6	0	0	0	0	0	0	0	0	0	0
ASV_684	0	0	0	0	0	0	0	0	0	0	13	0	0	0	0	0	0	0	0	0	0	27	0	0	0
ASV_685	0	0	0	0	0	0	0	0	0	0	0	20	20	0	0	0	0	0	0	0	0	0	0	0	0
ASV_686	0	0	0	0	0	0	0	0	0	0	0	0	0	0	40	0	0	0	0	0	0	0	0	0	0
ASV_687	0	0	0	0	0	0	0	0	0	0	0	0	0	0	0	0	0	0	0	0	0	40	0	0	0
ASV_688	0	0	0	0	0	0	0	0	0	0	0	0	0	0	0	0	0	0	0	0	0	0	40	0	0
ASV_689	0	0	0	0	0	0	0	0	0	0	0	0	0	0	0	0	0	0	0	0	0	0	40	0	0
ASV_690	0	0	0	0	0	0	0	0	0	0	0	0	0	0	0	0	0	0	0	0	0	0	0	0	40
ASV_691	0	0	0	0	0	0	0	0	0	0	0	0	0	0	0	0	0	0	0	0	0	0	0	0	40
ASV_692	0	0	0	0	0	0	0	0	0	0	0	0	0	0	0	0	0	0	0	0	0	0	0	0	40
ASV_693	0	0	0	0	0	0	0	0	0	0	0	0	0	0	0	0	0	0	0	0	0	0	0	0	40
ASV_694	11	0	0	0	0	0	7	0	0	0	0	6	0	14	0	0	0	0	0	1	0	0	0	0	0
ASV_695	7	1	0	3	4	7	3	0	0	0	8	0	3	0	3	0	0	0	0	0	0	0	0	0	0
ASV_696	4	0	6	0	6	0	7	0	0	0	0	0	5	0	5	0	0	6	0	0	0	0	0	0	0
ASV_697	0	8	0	4	0	5	0	0	0	0	0	8	0	6	8	0	0	0	0	0	0	0	0	0	0
ASV_698	0	0	4	0	0	0	0	0	0	0	0	0	0	0	8	0	0	0	0	0	9	0	0	0	18
ASV_699	0	0	0	0	12	0	27	0	0	0	0	0	0	0	0	0	0	0	0	0	0	0	0	0	0
ASV_700	0	0	0	0	0	0	2	0	0	0	0	0	0	0	0	0	0	0	0	16	0	0	0	0	21
ASV_701	0	0	0	0	0	0	0	0	0	0	0	0	0	0	0	17	0	0	0	22	0	0	0	0	0
ASV_702	0	0	0	0	0	0	0	0	0	0	0	0	0	0	0	14	0	0	12	0	0	0	0	13	0
ASV_703	0	0	0	0	0	0	0	0	0	0	0	0	0	0	0	7	0	0	0	0	0	0	0	32	0
ASV_704	0	0	0	0	0	0	0	0	0	0	0	0	0	0	0	0	0	0	0	0	0	27	0	12	0
ASV_705	0	0	0	0	0	0	0	0	0	0	0	0	0	0	0	0	0	0	0	0	0	0	0	0	39
ASV_706	7	0	5	0	0	0	1	0	0	6	0	3	4	4	8	0	0	0	0	0	0	0	0	0	0
ASV_707	4	0	0	9	7	0	6	0	0	0	0	0	0	0	0	0	0	0	12	0	0	0	0	0	0
ASV_708	3	1	6	0	7	0	0	0	5	6	0	3	3	3	0	0	1	0	0	0	0	0	0	0	0
ASV_709	0	9	0	9	0	0	0	0	0	0	0	0	0	8	0	4	0	0	0	8	0	0	0	0	0
ASV_710	0	2	5	0	7	7	4	3	0	0	1	5	1	0	3	0	0	0	0	0	0	0	0	0	0
ASV_711	0	0	7	0	0	0	0	0	0	0	0	0	0	0	0	0	6	0	10	0	15	0	0	0	0
ASV_712	0	0	0	0	18	0	20	0	0	0	0	0	0	0	0	0	0	0	0	0	0	0	0	0	0
ASV_713	0	0	0	0	0	0	0	0	0	0	0	0	0	0	0	9	0	0	6	0	0	12	0	11	0
ASV_714	0	0	0	0	0	0	0	0	0	0	0	0	0	0	0	0	10	10	0	0	0	0	0	18	0
ASV_715	0	0	0	0	0	0	0	0	0	0	0	0	0	0	0	0	0	0	0	20	18	0	0	0	0
ASV_716	0	0	0	0	0	0	0	0	0	0	0	0	0	0	0	0	0	0	0	0	38	0	0	0	0
ASV_717	0	0	0	0	0	0	0	0	0	0	0	0	0	0	0	0	0	0	0	0	0	0	0	0	38
ASV_718	0	0	0	0	0	0	0	0	0	0	0	0	0	0	0	0	0	0	0	0	0	0	0	0	38
ASV_719	5	5	0	6	0	5	4	0	0	0	0	0	6	6	0	0	0	0	0	0	0	0	0	0	0
ASV_720	1	4	3	5	6	8	1	0	7	2	0	0	0	0	0	0	0	0	0	0	0	0	0	0	0
ASV_721	0	0	12	0	0	0	0	0	0	13	0	0	0	0	0	12	0	0	0	0	0	0	0	0	0
ASV_722	0	0	0	0	9	0	0	0	0	8	0	12	0	8	0	0	0	0	0	0	0	0	0	0	0
ASV_723	0	0	0	0	0	0	0	0	0	16	0	0	17	0	4	0	0	0	0	0	0	0	0	0	0
ASV_724	0	0	0	0	0	0	0	0	0	0	0	0	0	13	0	0	11	0	13	0	0	0	0	0	0
ASV_725	0	0	0	0	0	0	0	0	0	0	0	0	0	0	10	0	18	0	9	0	0	0	0	0	0
ASV_726	0	0	0	0	0	0	0	0	0	0	0	0	0	0	0	9	9	0	19	0	0	0	0	0	0
ASV_727	0	0	0	0	0	0	0	0	0	0	0	0	0	0	0	0	0	0	0	0	0	37	0	0	0
ASV_728	0	0	0	0	0	0	0	0	0	0	0	0	0	0	0	0	0	0	0	0	0	21	0	16	0
ASV_729	0	0	0	0	0	0	0	0	0	0	0	0	0	0	0	0	0	0	0	0	0	18	0	19	0
ASV_730	0	0	0	0	0	0	0	0	0	0	0	0	0	0	0	0	0	0	0	0	0	0	0	0	37
ASV_731	10	9	0	0	0	0	17	0	0	0	0	0	0	0	0	0	0	0	0	0	0	0	0	0	0
ASV_732	0	22	0	14	0	0	0	0	0	0	0	0	0	0	0	0	0	0	0	0	0	0	0	0	0
ASV_733	0	8	0	0	5	0	0	0	0	0	0	8	0	0	6	0	4	0	0	5	0	0	0	0	0
ASV_734	0	6	6	0	0	0	6	0	0	0	0	0	0	3	7	0	0	0	0	8	0	0	0	0	0
ASV_735	0	0	23	0	0	0	0	0	0	0	0	0	13	0	0	0	0	0	0	0	0	0	0	0	0
ASV_736	0	0	0	0	0	0	0	0	10	0	0	15	11	0	0	0	0	0	0	0	0	0	0	0	0
ASV_737	0	0	0	0	0	0	0	0	0	8	0	0	0	0	0	0	0	0	0	0	0	0	0	0	28
ASV_738	0	0	0	0	0	0	0	0	0	7	0	9	0	0	0	0	0	0	0	7	13	0	0	0	0
ASV_739	0	0	0	0	0	0	0	0	0	0	18	0	0	0	0	0	0	5	13	0	0	0	0	0	0
ASV_740	0	0	0	0	0	0	0	0	0	0	2	14	5	0	15	0	0	0	0	0	0	0	0	0	0
ASV_741	0	0	0	0	0	0	0	0	0	0	0	0	0	0	0	0	0	6	0	19	0	0	0	11	0
ASV_742	0	0	0	0	0	0	0	0	0	0	0	0	0	0	0	0	0	0	36	0	0	0	0	0	0
ASV_743	0	0	0	0	0	0	0	0	0	0	0	0	0	0	0	0	0	0	14	0	0	22	0	0	0
ASV_744	0	0	0	0	0	0	0	0	0	0	0	0	0	0	0	0	0	0	0	0	15	0	0	0	21
ASV_745	0	0	0	0	0	0	0	0	0	0	0	0	0	0	0	0	0	0	0	0	9	27	0	0	0
ASV_746	0	0	0	0	0	0	0	0	0	0	0	0	0	0	0	0	0	0	0	0	0	36	0	0	0
ASV_747	0	0	0	0	0	0	0	0	0	0	0	0	0	0	0	0	0	0	0	0	0	0	36	0	0
ASV_748	0	0	0	0	0	0	0	0	0	0	0	0	0	0	0	0	0	0	0	0	0	0	36	0	0
ASV_749	0	0	0	0	0	0	0	0	0	0	0	0	0	0	0	0	0	0	0	0	0	0	0	0	36
ASV_750	0	0	0	0	0	0	0	0	0	0	0	0	0	0	0	0	0	0	0	0	0	0	0	0	36
ASV_751	0	0	0	0	0	0	0	0	0	0	0	0	0	0	0	0	0	0	0	0	0	0	0	0	36
ASV_752	0	0	0	0	0	0	0	0	0	0	0	0	0	0	0	0	0	0	0	0	0	0	0	0	36
ASV_753	12	12	0	0	0	0	11	0	0	0	0	0	0	0	0	0	0	0	0	0	0	0	0	0	0
ASV_754	5	3	2	4	0	2	1	7	0	7	0	0	0	4	0	0	0	0	0	0	0	0	0	0	0
ASV_755	5	0	2	0	3	7	0	2	4	0	1	1	6	0	3	0	0	1	0	0	0	0	0	0	0
ASV_756	2	0	4	4	5	0	2	1	0	4	0	1	2	9	1	0	0	0	0	0	0	0	0	0	0
ASV_757	0	14	0	0	13	0	2	0	0	0	0	0	0	0	0	6	0	0	0	0	0	0	0	0	0
ASV_758	0	7	0	0	6	0	0	0	0	0	0	0	0	0	0	0	0	8	0	0	14	0	0	0	0
ASV_759	0	4	0	5	0	4	5	0	0	0	0	0	0	0	0	0	0	6	0	0	0	0	0	11	0
ASV_760	0	0	4	0	6	0	0	0	0	0	0	12	0	6	5	0	0	0	2	0	0	0	0	0	0
ASV_761	0	0	0	0	12	0	0	0	0	0	0	0	0	0	18	0	0	5	0	0	0	0	0	0	0
ASV_762	0	0	0	0	8	0	10	0	0	0	0	5	8	0	0	0	0	4	0	0	0	0	0	0	0
ASV_763	0	0	0	0	4	0	0	0	0	0	0	0	0	0	0	0	8	0	0	0	0	0	0	23	0
ASV_764	0	0	0	0	0	0	8	0	0	0	0	0	11	0	7	9	0	0	0	0	0	0	0	0	0
ASV_765	0	0	0	0	0	0	0	0	0	0	0	0	0	0	8	0	0	0	14	13	0	0	0	0	0
ASV_766	0	0	0	0	0	0	0	0	0	0	0	0	0	0	0	13	10	0	0	12	0	0	0	0	0
ASV_767	0	0	0	0	0	0	0	0	0	0	0	0	0	0	0	0	0	0	11	0	0	24	0	0	0
ASV_768	0	0	0	0	0	0	0	0	0	0	0	0	0	0	0	0	0	0	0	35	0	0	0	0	0
ASV_769	0	0	0	0	0	0	0	0	0	0	0	0	0	0	0	0	0	0	0	0	0	0	35	0	0
ASV_770	0	0	0	0	0	0	0	0	0	0	0	0	0	0	0	0	0	0	0	0	0	0	35	0	0
ASV_771	0	0	0	0	0	0	0	0	0	0	0	0	0	0	0	0	0	0	0	0	0	0	0	35	0
ASV_772	0	0	0	0	0	0	0	0	0	0	0	0	0	0	0	0	0	0	0	0	0	0	0	35	0
ASV_773	0	0	0	0	0	0	0	0	0	0	0	0	0	0	0	0	0	0	0	0	0	0	0	0	35
ASV_774	0	0	0	0	0	0	0	0	0	0	0	0	0	0	0	0	0	0	0	0	0	0	0	0	35
ASV_775	8	8	0	0	0	5	4	0	0	9	0	0	0	0	0	0	0	0	0	0	0	0	0	0	0
ASV_776	8	0	9	0	0	0	5	0	0	0	7	5	0	0	0	0	0	0	0	0	0	0	0	0	0
ASV_777	1	0	0	0	1	0	0	1	8	0	9	0	4	3	7	0	0	0	0	0	0	0	0	0	0
ASV_778	0	0	0	0	16	0	0	7	0	0	0	0	0	0	0	0	0	0	0	0	11	0	0	0	0
ASV_779	0	0	0	0	0	0	19	0	0	0	0	0	15	0	0	0	0	0	0	0	0	0	0	0	0
ASV_780	0	0	0	0	0	0	10	0	0	0	6	0	0	5	0	0	0	0	13	0	0	0	0	0	0
ASV_781	0	0	0	0	0	0	7	0	0	0	0	13	0	0	8	0	0	0	6	0	0	0	0	0	0
ASV_782	0	0	0	0	0	0	0	0	7	0	0	11	7	0	0	0	9	0	0	0	0	0	0	0	0
ASV_783	0	0	0	0	0	0	0	0	0	11	0	0	13	0	10	0	0	0	0	0	0	0	0	0	0
ASV_784	0	0	0	0	0	0	0	0	0	0	0	0	0	0	0	8	7	0	8	11	0	0	0	0	0
ASV_785	0	0	0	0	0	0	0	0	0	0	0	0	0	0	0	0	0	0	0	34	0	0	0	0	0
ASV_786	0	0	0	0	0	0	0	0	0	0	0	0	0	0	0	0	0	0	0	12	0	0	0	0	22
ASV_787	0	0	0	0	0	0	0	0	0	0	0	0	0	0	0	0	0	0	0	9	0	0	0	0	25
ASV_788	0	0	0	0	0	0	0	0	0	0	0	0	0	0	0	0	0	0	0	0	0	34	0	0	0
ASV_789	0	0	0	0	0	0	0	0	0	0	0	0	0	0	0	0	0	0	0	0	0	10	0	0	24
ASV_790	0	0	0	0	0	0	0	0	0	0	0	0	0	0	0	0	0	0	0	0	0	0	34	0	0
ASV_791	0	0	0	0	0	0	0	0	0	0	0	0	0	0	0	0	0	0	0	0	0	0	34	0	0
ASV_792	0	0	0	0	0	0	0	0	0	0	0	0	0	0	0	0	0	0	0	0	0	0	0	0	34
ASV_793	0	0	0	0	0	0	0	0	0	0	0	0	0	0	0	0	0	0	0	0	0	0	0	0	34
ASV_794	0	0	0	0	0	0	0	0	0	0	0	0	0	0	0	0	0	0	0	0	0	0	0	0	34
ASV_795	0	0	0	0	0	0	0	0	0	0	0	0	0	0	0	0	0	0	0	0	0	0	0	0	34
ASV_796	0	0	0	0	0	0	0	0	0	0	0	0	0	0	0	0	0	0	0	0	0	0	0	0	34
ASV_797	11	0	0	0	2	0	11	0	0	9	0	0	0	0	0	0	0	0	0	0	0	0	0	0	0
ASV_798	4	0	6	0	5	0	0	0	5	0	0	0	9	0	4	0	0	0	0	0	0	0	0	0	0
ASV_799	3	0	3	0	0	0	0	0	0	0	0	0	0	0	0	0	9	0	0	0	18	0	0	0	0
ASV_800	0	0	5	3	0	0	0	7	0	1	7	1	6	1	2	0	0	0	0	0	0	0	0	0	0
ASV_801	0	0	0	0	3	0	0	0	0	0	3	3	0	0	5	0	0	0	0	0	0	19	0	0	0
ASV_802	0	0	0	0	0	0	17	0	0	0	0	0	0	0	0	0	0	0	0	16	0	0	0	0	0
ASV_803	0	0	0	0	0	0	14	0	0	0	0	0	0	0	0	0	0	0	0	19	0	0	0	0	0
ASV_804	0	0	0	0	0	0	14	0	0	0	0	0	9	0	0	0	10	0	0	0	0	0	0	0	0
ASV_805	0	0	0	0	0	0	0	0	0	0	3	0	0	0	0	0	30	0	0	0	0	0	0	0	0
ASV_806	0	0	0	0	0	0	0	0	0	0	0	16	0	0	0	0	0	0	0	17	0	0	0	0	0
ASV_807	0	0	0	0	0	0	0	0	0	0	0	6	9	7	0	0	0	11	0	0	0	0	0	0	0
ASV_808	0	0	0	0	0	0	0	0	0	0	0	0	0	0	0	33	0	0	0	0	0	0	0	0	0
ASV_809	0	0	0	0	0	0	0	0	0	0	0	0	0	0	0	17	0	0	0	6	10	0	0	0	0
ASV_810	0	0	0	0	0	0	0	0	0	0	0	0	0	0	0	0	16	0	0	17	0	0	0	0	0
ASV_811	0	0	0	0	0	0	0	0	0	0	0	0	0	0	0	0	11	0	14	8	0	0	0	0	0
ASV_812	0	0	0	0	0	0	0	0	0	0	0	0	0	0	0	0	0	0	33	0	0	0	0	0	0
ASV_813	0	0	0	0	0	0	0	0	0	0	0	0	0	0	0	0	0	0	11	0	0	22	0	0	0
ASV_814	0	0	0	0	0	0	0	0	0	0	0	0	0	0	0	0	0	0	0	0	33	0	0	0	0
ASV_815	0	0	0	0	0	0	0	0	0	0	0	0	0	0	0	0	0	0	0	0	15	18	0	0	0
ASV_816	0	0	0	0	0	0	0	0	0	0	0	0	0	0	0	0	0	0	0	0	0	18	0	0	15
ASV_817	0	0	0	0	0	0	0	0	0	0	0	0	0	0	0	0	0	0	0	0	0	0	0	33	0
ASV_818	0	0	0	0	0	0	0	0	0	0	0	0	0	0	0	0	0	0	0	0	0	0	0	0	33
ASV_819	0	0	0	0	0	0	0	0	0	0	0	0	0	0	0	0	0	0	0	0	0	0	0	0	33
ASV_820	8	0	0	3	6	0	0	0	0	0	0	0	8	0	0	0	0	0	0	0	7	0	0	0	0
ASV_821	0	5	0	6	0	0	0	0	8	0	0	0	0	0	13	0	0	0	0	0	0	0	0	0	0
ASV_822	0	0	5	0	0	0	0	2	0	0	0	0	2	0	0	0	0	0	23	0	0	0	0	0	0
ASV_823	0	0	4	0	0	0	7	2	0	4	0	0	0	0	0	0	10	0	5	0	0	0	0	0	0
ASV_824	0	0	3	4	6	0	0	0	4	5	5	0	0	5	0	0	0	0	0	0	0	0	0	0	0
ASV_825	0	0	0	19	0	0	0	0	0	13	0	0	0	0	0	0	0	0	0	0	0	0	0	0	0
ASV_826	0	0	0	15	0	0	0	0	0	0	0	0	0	0	0	0	0	0	17	0	0	0	0	0	0
ASV_827	0	0	0	0	9	0	0	0	0	0	0	0	8	0	0	0	0	0	0	0	15	0	0	0	0
ASV_828	0	0	0	0	0	0	0	0	0	0	0	0	14	0	0	0	0	0	0	0	0	0	0	18	0
ASV_829	0	0	0	0	0	0	0	0	0	0	0	0	0	0	0	22	10	0	0	0	0	0	0	0	0
ASV_830	0	0	0	0	0	0	0	0	0	0	0	0	0	0	0	14	0	0	0	0	0	18	0	0	0
ASV_831	0	0	0	0	0	0	0	0	0	0	0	0	0	0	0	0	32	0	0	0	0	0	0	0	0
ASV_832	0	0	0	0	0	0	0	0	0	0	0	0	0	0	0	0	0	0	13	0	0	0	0	0	19
ASV_833	0	0	0	0	0	0	0	0	0	0	0	0	0	0	0	0	0	0	12	20	0	0	0	0	0
ASV_834	0	0	0	0	0	0	0	0	0	0	0	0	0	0	0	0	0	0	0	0	20	12	0	0	0
ASV_835	0	0	0	0	0	0	0	0	0	0	0	0	0	0	0	0	0	0	0	0	0	32	0	0	0
ASV_836	0	0	0	0	0	0	0	0	0	0	0	0	0	0	0	0	0	0	0	0	0	32	0	0	0
ASV_837	0	0	0	0	0	0	0	0	0	0	0	0	0	0	0	0	0	0	0	0	0	0	32	0	0
ASV_838	0	0	0	0	0	0	0	0	0	0	0	0	0	0	0	0	0	0	0	0	0	0	0	32	0
ASV_839	0	0	0	0	0	0	0	0	0	0	0	0	0	0	0	0	0	0	0	0	0	0	0	32	0
ASV_840	0	0	0	0	0	0	0	0	0	0	0	0	0	0	0	0	0	0	0	0	0	0	0	0	32
ASV_841	0	0	0	0	0	0	0	0	0	0	0	0	0	0	0	0	0	0	0	0	0	0	0	0	32
ASV_842	0	0	0	0	0	0	0	0	0	0	0	0	0	0	0	0	0	0	0	0	0	0	0	0	32
ASV_843	0	0	0	0	0	0	0	0	0	0	0	0	0	0	0	0	0	0	0	0	0	0	0	0	32
ASV_844	0	0	0	0	0	0	0	0	0	0	0	0	0	0	0	0	0	0	0	0	0	0	0	0	32
ASV_845	0	0	0	0	0	0	0	0	0	0	0	0	0	0	0	0	0	0	0	0	0	0	0	0	32
ASV_846	15	0	0	10	0	6	0	0	0	0	0	0	0	0	0	0	0	0	0	0	0	0	0	0	0
ASV_847	0	10	0	0	0	0	0	0	0	0	0	0	0	0	0	21	0	0	0	0	0	0	0	0	0
ASV_848	0	9	0	4	0	0	18	0	0	0	0	0	0	0	0	0	0	0	0	0	0	0	0	0	0
ASV_849	0	5	0	0	15	0	0	0	0	0	0	0	0	0	11	0	0	0	0	0	0	0	0	0	0
ASV_850	0	1	0	0	0	0	0	1	0	0	7	9	9	0	4	0	0	0	0	0	0	0	0	0	0
ASV_851	0	0	10	0	0	0	0	11	0	0	0	0	0	0	0	0	0	0	0	10	0	0	0	0	0
ASV_852	0	0	9	15	0	0	0	0	0	0	7	0	0	0	0	0	0	0	0	0	0	0	0	0	0
ASV_853	0	0	8	0	4	0	0	0	0	0	0	4	0	6	0	0	0	0	0	0	0	0	0	0	9
ASV_854	0	0	0	0	3	0	6	0	0	0	0	6	5	6	5	0	0	0	0	0	0	0	0	0	0
ASV_855	0	0	0	0	0	5	8	0	6	0	0	0	7	0	5	0	0	0	0	0	0	0	0	0	0
ASV_856	0	0	0	0	0	0	0	0	0	18	0	0	0	0	0	0	0	0	0	13	0	0	0	0	0
ASV_857	0	0	0	0	0	0	0	0	0	0	13	0	0	0	18	0	0	0	0	0	0	0	0	0	0
ASV_858	0	0	0	0	0	0	0	0	0	0	5	0	0	0	8	0	0	0	0	0	18	0	0	0	0
ASV_859	0	0	0	0	0	0	0	0	0	0	0	4	0	0	3	10	0	0	14	0	0	0	0	0	0
ASV_860	0	0	0	0	0	0	0	0	0	0	0	0	0	4	1	5	0	0	0	0	21	0	0	0	0
ASV_861	0	0	0	0	0	0	0	0	0	0	0	0	0	0	0	0	7	0	0	0	0	24	0	0	0
ASV_862	0	0	0	0	0	0	0	0	0	0	0	0	0	0	0	0	0	18	0	13	0	0	0	0	0
ASV_863	0	0	0	0	0	0	0	0	0	0	0	0	0	0	0	0	0	13	18	0	0	0	0	0	0
ASV_864	0	0	0	0	0	0	0	0	0	0	0	0	0	0	0	0	0	0	16	15	0	0	0	0	0
ASV_865	0	0	0	0	0	0	0	0	0	0	0	0	0	0	0	0	0	0	13	6	12	0	0	0	0
ASV_866	0	0	0	0	0	0	0	0	0	0	0	0	0	0	0	0	0	0	0	5	0	0	0	26	0
ASV_867	0	0	0	0	0	0	0	0	0	0	0	0	0	0	0	0	0	0	0	0	9	0	0	22	0
ASV_868	0	0	0	0	0	0	0	0	0	0	0	0	0	0	0	0	0	0	0	0	0	31	0	0	0
ASV_869	0	0	0	0	0	0	0	0	0	0	0	0	0	0	0	0	0	0	0	0	0	31	0	0	0
ASV_870	0	0	0	0	0	0	0	0	0	0	0	0	0	0	0	0	0	0	0	0	0	0	31	0	0
ASV_871	0	0	0	0	0	0	0	0	0	0	0	0	0	0	0	0	0	0	0	0	0	0	31	0	0
ASV_872	0	0	0	0	0	0	0	0	0	0	0	0	0	0	0	0	0	0	0	0	0	0	31	0	0
ASV_873	0	0	0	0	0	0	0	0	0	0	0	0	0	0	0	0	0	0	0	0	0	0	31	0	0
ASV_874	0	0	0	0	0	0	0	0	0	0	0	0	0	0	0	0	0	0	0	0	0	0	0	31	0
ASV_875	0	0	0	0	0	0	0	0	0	0	0	0	0	0	0	0	0	0	0	0	0	0	0	17	14
ASV_876	0	0	0	0	0	0	0	0	0	0	0	0	0	0	0	0	0	0	0	0	0	0	0	0	31
ASV_877	0	0	0	0	0	0	0	0	0	0	0	0	0	0	0	0	0	0	0	0	0	0	0	0	31
ASV_878	8	3	0	6	0	0	0	0	0	7	0	0	0	0	6	0	0	0	0	0	0	0	0	0	0
ASV_879	7	0	0	0	0	0	7	0	0	0	0	0	0	7	9	0	0	0	0	0	0	0	0	0	0
ASV_880	6	0	0	0	0	0	0	0	0	0	0	0	0	0	10	14	0	0	0	0	0	0	0	0	0
ASV_881	6	0	0	6	0	4	0	0	5	4	0	0	0	5	0	0	0	0	0	0	0	0	0	0	0
ASV_882	3	0	7	0	0	0	0	5	1	0	1	5	5	0	3	0	0	0	0	0	0	0	0	0	0
ASV_883	3	0	0	0	0	0	0	0	0	0	0	0	0	0	0	0	8	0	0	19	0	0	0	0	0
ASV_884	2	0	0	10	8	0	0	0	0	0	0	0	0	0	10	0	0	0	0	0	0	0	0	0	0
ASV_885	0	13	6	0	0	0	0	0	0	0	6	0	0	0	0	0	0	0	0	5	0	0	0	0	0
ASV_886	0	0	11	0	4	0	0	0	0	0	5	0	8	0	0	0	2	0	0	0	0	0	0	0	0
ASV_887	0	0	10	0	12	0	0	0	0	8	0	0	0	0	0	0	0	0	0	0	0	0	0	0	0
ASV_888	0	0	6	0	8	4	0	0	0	0	0	0	0	0	0	0	12	0	0	0	0	0	0	0	0
ASV_889	0	0	5	4	6	0	0	0	0	0	7	0	0	5	3	0	0	0	0	0	0	0	0	0	0
ASV_890	0	0	0	0	0	0	0	0	4	6	0	0	0	0	11	0	0	9	0	0	0	0	0	0	0
ASV_891	0	0	0	0	0	0	0	0	0	0	0	13	0	0	0	15	0	0	0	0	2	0	0	0	0
ASV_892	0	0	0	0	0	0	0	0	0	0	0	0	0	0	0	11	11	0	0	0	8	0	0	0	0
ASV_893	0	0	0	0	0	0	0	0	0	0	0	0	0	0	0	0	30	0	0	0	0	0	0	0	0
ASV_894	0	0	0	0	0	0	0	0	0	0	0	0	0	0	0	0	18	0	0	0	0	12	0	0	0
ASV_895	0	0	0	0	0	0	0	0	0	0	0	0	0	0	0	0	0	0	30	0	0	0	0	0	0
ASV_896	0	0	0	0	0	0	0	0	0	0	0	0	0	0	0	0	0	0	0	0	0	19	0	0	11
ASV_897	0	0	0	0	0	0	0	0	0	0	0	0	0	0	0	0	0	0	0	0	0	0	30	0	0
ASV_898	0	0	0	0	0	0	0	0	0	0	0	0	0	0	0	0	0	0	0	0	0	0	30	0	0
ASV_899	0	0	0	0	0	0	0	0	0	0	0	0	0	0	0	0	0	0	0	0	0	0	0	30	0
ASV_900	0	0	0	0	0	0	0	0	0	0	0	0	0	0	0	0	0	0	0	0	0	0	0	0	30
ASV_901	0	0	0	0	0	0	0	0	0	0	0	0	0	0	0	0	0	0	0	0	0	0	0	0	30
ASV_902	14	0	0	15	0	0	0	0	0	0	0	0	0	0	0	0	0	0	0	0	0	0	0	0	0
ASV_903	0	4	9	0	0	0	7	0	4	0	0	0	0	0	5	0	0	0	0	0	0	0	0	0	0
ASV_904	0	3	0	0	3	0	0	0	0	0	0	0	0	0	0	0	0	0	0	0	0	0	0	0	23
ASV_905	0	0	0	0	0	0	0	0	0	0	7	0	0	0	0	0	0	7	0	0	0	0	0	0	15
ASV_906	0	0	0	0	0	0	0	0	0	0	0	6	0	0	0	11	0	0	0	10	0	0	1	0	1
ASV_907	0	0	0	0	0	0	0	0	0	0	0	0	0	10	0	0	0	0	0	0	0	0	0	0	19
ASV_908	0	0	0	0	0	0	0	0	0	0	0	0	0	0	4	0	0	0	7	0	0	0	0	18	0
ASV_909	0	0	0	0	0	0	0	0	0	0	0	0	0	0	0	0	0	0	29	0	0	0	0	0	0
ASV_910	0	0	0	0	0	0	0	0	0	0	0	0	0	0	0	0	0	0	13	0	0	0	0	16	0
ASV_911	0	0	0	0	0	0	0	0	0	0	0	0	0	0	0	0	0	0	0	0	0	19	0	10	0
ASV_912	0	0	0	0	0	0	0	0	0	0	0	0	0	0	0	0	0	0	0	0	0	10	0	0	19
ASV_913	0	0	0	0	0	0	0	0	0	0	0	0	0	0	0	0	0	0	0	0	0	0	29	0	0
ASV_914	0	0	0	0	0	0	0	0	0	0	0	0	0	0	0	0	0	0	0	0	0	0	29	0	0
ASV_915	0	0	0	0	0	0	0	0	0	0	0	0	0	0	0	0	0	0	0	0	0	0	0	0	29
ASV_916	0	0	0	0	0	0	0	0	0	0	0	0	0	0	0	0	0	0	0	0	0	0	0	0	29
ASV_917	0	0	0	0	0	0	0	0	0	0	0	0	0	0	0	0	0	0	0	0	0	0	0	0	29
ASV_918	8	0	0	0	0	0	0	0	0	0	0	8	0	0	12	0	0	0	0	0	0	0	0	0	0
ASV_919	6	0	0	5	0	0	0	5	0	0	0	0	0	0	0	0	0	0	6	6	0	0	0	0	0
ASV_920	2	4	1	1	1	0	0	0	0	1	6	0	1	6	0	0	0	0	5	0	0	0	0	0	0
ASV_921	0	12	0	0	0	0	0	0	0	0	0	0	0	0	0	16	0	0	0	0	0	0	0	0	0
ASV_922	0	2	3	0	0	0	0	11	0	7	1	1	2	0	1	0	0	0	0	0	0	0	0	0	0
ASV_923	0	0	6	0	0	0	0	0	0	0	0	0	0	4	0	0	0	10	0	8	0	0	0	0	0
ASV_924	0	0	0	0	12	0	0	0	0	0	0	0	0	0	0	0	0	0	16	0	0	0	0	0	0
ASV_925	0	0	0	0	0	0	15	3	0	0	0	4	6	0	0	0	0	0	0	0	0	0	0	0	0
ASV_926	0	0	0	0	0	0	8	0	0	6	8	0	0	0	6	0	0	0	0	0	0	0	0	0	0
ASV_927	0	0	0	0	0	0	0	10	0	0	5	7	0	0	0	0	0	0	0	0	0	0	0	6	0
ASV_928	0	0	0	0	0	0	0	0	0	0	0	8	0	9	11	0	0	0	0	0	0	0	0	0	0
ASV_929	0	0	0	0	0	0	0	0	0	0	0	0	6	0	0	0	0	0	0	0	22	0	0	0	0
ASV_930	0	0	0	0	0	0	0	0	0	0	0	0	0	15	0	0	0	13	0	0	0	0	0	0	0
ASV_931	0	0	0	0	0	0	0	0	0	0	0	0	0	0	17	0	0	11	0	0	0	0	0	0	0
ASV_932	0	0	0	0	0	0	0	0	0	0	0	0	0	0	0	15	13	0	0	0	0	0	0	0	0
ASV_933	0	0	0	0	0	0	0	0	0	0	0	0	0	0	0	0	14	0	0	14	0	0	0	0	0
ASV_934	0	0	0	0	0	0	0	0	0	0	0	0	0	0	0	0	0	0	8	0	0	20	0	0	0
ASV_935	0	0	0	0	0	0	0	0	0	0	0	0	0	0	0	0	0	0	0	3	0	0	0	25	0
ASV_936	0	0	0	0	0	0	0	0	0	0	0	0	0	0	0	0	0	0	0	0	15	0	0	0	13
ASV_937	0	0	0	0	0	0	0	0	0	0	0	0	0	0	0	0	0	0	0	0	0	28	0	0	0
ASV_938	0	0	0	0	0	0	0	0	0	0	0	0	0	0	0	0	0	0	0	0	0	0	28	0	0
ASV_939	7	4	0	4	10	0	1	0	0	0	0	0	0	0	1	0	0	0	0	0	0	0	0	0	0
ASV_940	7	0	0	0	0	0	4	0	0	0	0	0	0	0	0	0	11	5	0	0	0	0	0	0	0
ASV_941	5	0	0	5	6	0	5	0	0	0	0	0	0	0	0	0	0	6	0	0	0	0	0	0	0
ASV_942	1	1	0	0	1	11	0	1	8	2	0	0	0	1	1	0	0	0	0	0	0	0	0	0	0
ASV_943	0	6	4	0	0	0	0	0	0	0	0	7	7	1	2	0	0	0	0	0	0	0	0	0	0
ASV_944	0	2	2	6	2	9	0	4	0	2	0	0	0	0	0	0	0	0	0	0	0	0	0	0	0
ASV_945	0	0	5	0	0	5	0	0	0	4	3	5	5	0	0	0	0	0	0	0	0	0	0	0	0
ASV_946	0	0	5	7	0	0	8	0	0	0	0	0	7	0	0	0	0	0	0	0	0	0	0	0	0
ASV_947	0	0	4	0	0	0	0	0	0	0	0	0	0	0	0	0	0	0	0	0	0	23	0	0	0
ASV_948	0	0	0	0	0	4	4	0	0	0	11	0	8	0	0	0	0	0	0	0	0	0	0	0	0
ASV_949	0	0	0	0	0	0	5	0	0	0	0	11	0	11	0	0	0	0	0	0	0	0	0	0	0
ASV_950	0	0	0	0	0	0	0	0	0	0	0	0	7	0	0	20	0	0	0	0	0	0	0	0	0
ASV_951	0	0	0	0	0	0	0	0	0	0	0	0	0	0	0	0	13	0	0	0	0	0	0	14	0
ASV_952	0	0	0	0	0	0	0	0	0	0	0	0	0	0	0	0	0	13	8	6	0	0	0	0	0
ASV_953	0	0	0	0	0	0	0	0	0	0	0	0	0	0	0	0	0	10	17	0	0	0	0	0	0
ASV_954	0	0	0	0	0	0	0	0	0	0	0	0	0	0	0	0	0	8	0	0	0	0	0	19	0
ASV_955	0	0	0	0	0	0	0	0	0	0	0	0	0	0	0	0	0	6	0	0	0	21	0	0	0
ASV_956	0	0	0	0	0	0	0	0	0	0	0	0	0	0	0	0	0	0	27	0	0	0	0	0	0
ASV_957	0	0	0	0	0	0	0	0	0	0	0	0	0	0	0	0	0	0	8	0	0	0	0	0	19
ASV_958	0	0	0	0	0	0	0	0	0	0	0	0	0	0	0	0	0	0	0	9	0	18	0	0	0
ASV_959	0	0	0	0	0	0	0	0	0	0	0	0	0	0	0	0	0	0	0	0	27	0	0	0	0
ASV_960	0	0	0	0	0	0	0	0	0	0	0	0	0	0	0	0	0	0	0	0	0	27	0	0	0
ASV_961	0	0	0	0	0	0	0	0	0	0	0	0	0	0	0	0	0	0	0	0	0	27	0	0	0
ASV_962	0	0	0	0	0	0	0	0	0	0	0	0	0	0	0	0	0	0	0	0	0	0	27	0	0
ASV_963	0	0	0	0	0	0	0	0	0	0	0	0	0	0	0	0	0	0	0	0	0	0	27	0	0
ASV_964	0	0	0	0	0	0	0	0	0	0	0	0	0	0	0	0	0	0	0	0	0	0	0	27	0
ASV_965	0	0	0	0	0	0	0	0	0	0	0	0	0	0	0	0	0	0	0	0	0	0	0	0	27
ASV_966	0	0	0	0	0	0	0	0	0	0	0	0	0	0	0	0	0	0	0	0	0	0	0	0	27
ASV_967	11	0	7	0	0	0	0	0	0	0	0	0	0	0	0	0	8	0	0	0	0	0	0	0	0
ASV_968	0	26	0	0	0	0	0	0	0	0	0	0	0	0	0	0	0	0	0	0	0	0	0	0	0
ASV_969	0	11	0	0	0	0	0	0	0	0	0	8	0	0	7	0	0	0	0	0	0	0	0	0	0
ASV_970	0	9	0	4	0	0	0	0	0	3	0	0	5	0	5	0	0	0	0	0	0	0	0	0	0
ASV_971	0	7	0	6	1	0	0	0	4	6	2	0	0	0	0	0	0	0	0	0	0	0	0	0	0
ASV_972	0	0	0	17	0	3	0	0	0	0	0	0	6	0	0	0	0	0	0	0	0	0	0	0	0
ASV_973	0	0	0	7	0	0	0	0	0	0	0	0	0	0	0	0	0	0	0	0	19	0	0	0	0
ASV_974	0	0	0	0	0	0	7	0	0	0	0	0	0	0	0	0	0	0	0	19	0	0	0	0	0
ASV_975	0	0	0	0	0	0	0	0	0	15	0	0	0	0	11	0	0	0	0	0	0	0	0	0	0
ASV_976	0	0	0	0	0	0	0	0	0	4	0	0	0	0	0	7	0	0	0	0	0	0	15	0	0
ASV_977	0	0	0	0	0	0	0	0	0	0	11	0	0	0	0	0	0	0	0	0	0	0	0	0	15
ASV_978	0	0	0	0	0	0	0	0	0	0	0	10	5	0	0	0	0	0	0	0	0	11	0	0	0
ASV_979	0	0	0	0	0	0	0	0	0	0	0	8	7	0	11	0	0	0	0	0	0	0	0	0	0
ASV_980	0	0	0	0	0	0	0	0	0	0	0	6	0	0	0	0	0	0	0	0	0	0	0	0	20
ASV_981	0	0	0	0	0	0	0	0	0	0	0	0	0	0	13	0	13	0	0	0	0	0	0	0	0
ASV_982	0	0	0	0	0	0	0	0	0	0	0	0	0	0	0	21	0	5	0	0	0	0	0	0	0
ASV_983	0	0	0	0	0	0	0	0	0	0	0	0	0	0	0	0	26	0	0	0	0	0	0	0	0
ASV_984	0	0	0	0	0	0	0	0	0	0	0	0	0	0	0	0	0	0	0	26	0	0	0	0	0
ASV_985	0	0	0	0	0	0	0	0	0	0	0	0	0	0	0	0	0	0	0	26	0	0	0	0	0
ASV_986	0	0	0	0	0	0	0	0	0	0	0	0	0	0	0	0	0	0	0	0	0	26	0	0	0
ASV_987	0	0	0	0	0	0	0	0	0	0	0	0	0	0	0	0	0	0	0	0	0	26	0	0	0
ASV_988	0	0	0	0	0	0	0	0	0	0	0	0	0	0	0	0	0	0	0	0	0	26	0	0	0
ASV_989	0	0	0	0	0	0	0	0	0	0	0	0	0	0	0	0	0	0	0	0	0	13	0	13	0
ASV_990	0	0	0	0	0	0	0	0	0	0	0	0	0	0	0	0	0	0	0	0	0	0	26	0	0
ASV_991	0	0	0	0	0	0	0	0	0	0	0	0	0	0	0	0	0	0	0	0	0	0	0	26	0
ASV_992	0	0	0	0	0	0	0	0	0	0	0	0	0	0	0	0	0	0	0	0	0	0	0	0	26
ASV_993	0	0	0	0	0	0	0	0	0	0	0	0	0	0	0	0	0	0	0	0	0	0	0	0	26
ASV_994	0	0	0	0	0	0	0	0	0	0	0	0	0	0	0	0	0	0	0	0	0	0	0	0	26
ASV_995	0	0	0	0	0	0	0	0	0	0	0	0	0	0	0	0	0	0	0	0	0	0	0	0	26
ASV_996	0	0	0	0	0	0	0	0	0	0	0	0	0	0	0	0	0	0	0	0	0	0	0	0	26
ASV_997	0	0	0	0	0	0	0	0	0	0	0	0	0	0	0	0	0	0	0	0	0	0	0	0	26
ASV_998	2	4	0	1	0	0	1	2	5	1	2	0	0	4	0	0	0	0	1	2	0	0	0	0	0
ASV_999	0	9	0	0	0	0	0	0	0	16	0	0	0	0	0	0	0	0	0	0	0	0	0	0	0
ASV_1000	0	7	0	0	3	0	0	9	0	0	0	0	0	6	0	0	0	0	0	0	0	0	0	0	0
ASV_1001	0	7	0	0	5	0	0	0	0	0	4	0	0	9	0	0	0	0	0	0	0	0	0	0	0
ASV_1002	0	5	0	0	10	0	0	0	0	0	0	4	4	0	2	0	0	0	0	0	0	0	0	0	0
ASV_1003	0	4	0	0	0	0	4	0	0	0	0	0	0	0	0	0	0	0	0	0	0	0	0	17	0
ASV_1004	0	0	0	8	0	0	0	0	0	0	0	0	0	0	11	0	6	0	0	0	0	0	0	0	0
ASV_1005	0	0	0	4	0	0	0	0	0	0	0	3	2	4	6	0	0	0	6	0	0	0	0	0	0
ASV_1006	0	0	0	0	0	3	0	0	0	0	0	0	5	0	5	12	0	0	0	0	0	0	0	0	0
ASV_1007	0	0	0	0	0	0	0	0	0	4	6	0	0	9	0	0	0	0	6	0	0	0	0	0	0
ASV_1008	0	0	0	0	0	0	0	0	0	3	5	0	3	3	0	0	0	0	0	11	0	0	0	0	0
ASV_1009	0	0	0	0	0	0	0	0	0	0	13	0	2	10	0	0	0	0	0	0	0	0	0	0	0
ASV_1010	0	0	0	0	0	0	0	0	0	0	0	7	0	8	8	0	0	0	0	2	0	0	0	0	0
ASV_1011	0	0	0	0	0	0	0	0	0	0	0	0	25	0	0	0	0	0	0	0	0	0	0	0	0
ASV_1012	0	0	0	0	0	0	0	0	0	0	0	0	0	0	14	0	0	0	0	0	0	0	0	11	0
ASV_1013	0	0	0	0	0	0	0	0	0	0	0	0	0	0	0	25	0	0	0	0	0	0	0	0	0
ASV_1014	0	0	0	0	0	0	0	0	0	0	0	0	0	0	0	10	0	4	11	0	0	0	0	0	0
ASV_1015	0	0	0	0	0	0	0	0	0	0	0	0	0	0	0	5	0	2	0	0	8	10	0	0	0
ASV_1016	0	0	0	0	0	0	0	0	0	0	0	0	0	0	0	0	0	11	14	0	0	0	0	0	0
ASV_1017	0	0	0	0	0	0	0	0	0	0	0	0	0	0	0	0	0	0	25	0	0	0	0	0	0
ASV_1018	0	0	0	0	0	0	0	0	0	0	0	0	0	0	0	0	0	0	11	14	0	0	0	0	0
ASV_1019	0	0	0	0	0	0	0	0	0	0	0	0	0	0	0	0	0	0	0	25	0	0	0	0	0
ASV_1020	0	0	0	0	0	0	0	0	0	0	0	0	0	0	0	0	0	0	0	25	0	0	0	0	0
ASV_1021	0	0	0	0	0	0	0	0	0	0	0	0	0	0	0	0	0	0	0	6	0	0	0	0	19
ASV_1022	0	0	0	0	0	0	0	0	0	0	0	0	0	0	0	0	0	0	0	0	0	25	0	0	0
ASV_1023	0	0	0	0	0	0	0	0	0	0	0	0	0	0	0	0	0	0	0	0	0	25	0	0	0
ASV_1024	0	0	0	0	0	0	0	0	0	0	0	0	0	0	0	0	0	0	0	0	0	25	0	0	0
ASV_1025	0	0	0	0	0	0	0	0	0	0	0	0	0	0	0	0	0	0	0	0	0	25	0	0	0
ASV_1026	0	0	0	0	0	0	0	0	0	0	0	0	0	0	0	0	0	0	0	0	0	25	0	0	0
ASV_1027	0	0	0	0	0	0	0	0	0	0	0	0	0	0	0	0	0	0	0	0	0	25	0	0	0
ASV_1028	0	0	0	0	0	0	0	0	0	0	0	0	0	0	0	0	0	0	0	0	0	9	0	16	0
ASV_1029	0	0	0	0	0	0	0	0	0	0	0	0	0	0	0	0	0	0	0	0	0	0	25	0	0
ASV_1030	0	0	0	0	0	0	0	0	0	0	0	0	0	0	0	0	0	0	0	0	0	0	0	25	0
ASV_1031	0	0	0	0	0	0	0	0	0	0	0	0	0	0	0	0	0	0	0	0	0	0	0	25	0
ASV_1032	0	0	0	0	0	0	0	0	0	0	0	0	0	0	0	0	0	0	0	0	0	0	0	0	25
ASV_1033	0	0	0	0	0	0	0	0	0	0	0	0	0	0	0	0	0	0	0	0	0	0	0	0	25
ASV_1034	6	0	0	0	6	0	0	0	0	0	0	0	0	6	6	0	0	0	0	0	0	0	0	0	0
ASV_1035	2	0	0	0	1	2	2	2	0	0	0	3	8	4	0	0	0	0	0	0	0	0	0	0	0
ASV_1036	0	5	0	2	0	0	0	0	0	0	0	3	4	3	7	0	0	0	0	0	0	0	0	0	0
ASV_1037	0	4	0	0	5	0	0	0	0	0	0	0	15	0	0	0	0	0	0	0	0	0	0	0	0
ASV_1038	0	3	0	5	3	4	0	0	0	4	0	0	0	0	0	0	0	0	5	0	0	0	0	0	0
ASV_1039	0	0	0	6	0	0	0	0	0	0	0	6	5	1	6	0	0	0	0	0	0	0	0	0	0
ASV_1040	0	0	0	4	0	0	8	0	0	0	0	0	12	0	0	0	0	0	0	0	0	0	0	0	0
ASV_1041	0	0	0	0	24	0	0	0	0	0	0	0	0	0	0	0	0	0	0	0	0	0	0	0	0
ASV_1042	0	0	0	0	7	0	8	0	0	0	0	0	0	0	0	0	0	0	8	0	0	0	0	0	1
ASV_1043	0	0	0	0	0	0	14	0	0	0	0	0	0	0	10	0	0	0	0	0	0	0	0	0	0
ASV_1044	0	0	0	0	0	0	0	3	0	0	0	0	0	0	0	0	9	0	12	0	0	0	0	0	0
ASV_1045	0	0	0	0	0	0	0	0	0	0	0	12	0	0	12	0	0	0	0	0	0	0	0	0	0
ASV_1046	0	0	0	0	0	0	0	0	0	0	0	0	0	24	0	0	0	0	0	0	0	0	0	0	0
ASV_1047	0	0	0	0	0	0	0	0	0	0	0	0	0	0	7	0	0	0	0	17	0	0	0	0	0
ASV_1048	0	0	0	0	0	0	0	0	0	0	0	0	0	0	0	13	0	0	11	0	0	0	0	0	0
ASV_1049	0	0	0	0	0	0	0	0	0	0	0	0	0	0	0	12	0	0	0	0	0	0	0	0	12
ASV_1050	0	0	0	0	0	0	0	0	0	0	0	0	0	0	0	12	0	12	0	0	0	0	0	0	0
ASV_1051	0	0	0	0	0	0	0	0	0	0	0	0	0	0	0	11	0	0	0	0	13	0	0	0	0
ASV_1052	0	0	0	0	0	0	0	0	0	0	0	0	0	0	0	6	0	0	0	0	0	0	0	18	0
ASV_1053	0	0	0	0	0	0	0	0	0	0	0	0	0	0	0	0	0	24	0	0	0	0	0	0	0
ASV_1054	0	0	0	0	0	0	0	0	0	0	0	0	0	0	0	0	0	0	12	0	7	5	0	0	0
ASV_1055	0	0	0	0	0	0	0	0	0	0	0	0	0	0	0	0	0	0	0	24	0	0	0	0	0
ASV_1056	0	0	0	0	0	0	0	0	0	0	0	0	0	0	0	0	0	0	0	0	24	0	0	0	0
ASV_1057	0	0	0	0	0	0	0	0	0	0	0	0	0	0	0	0	0	0	0	0	0	24	0	0	0
ASV_1058	0	0	0	0	0	0	0	0	0	0	0	0	0	0	0	0	0	0	0	0	0	24	0	0	0
ASV_1059	0	0	0	0	0	0	0	0	0	0	0	0	0	0	0	0	0	0	0	0	0	0	24	0	0
ASV_1060	0	0	0	0	0	0	0	0	0	0	0	0	0	0	0	0	0	0	0	0	0	0	24	0	0
ASV_1061	0	0	0	0	0	0	0	0	0	0	0	0	0	0	0	0	0	0	0	0	0	0	0	24	0
ASV_1062	0	0	0	0	0	0	0	0	0	0	0	0	0	0	0	0	0	0	0	0	0	0	0	24	0
ASV_1063	0	0	0	0	0	0	0	0	0	0	0	0	0	0	0	0	0	0	0	0	0	0	0	0	24
ASV_1064	0	0	0	0	0	0	0	0	0	0	0	0	0	0	0	0	0	0	0	0	0	0	0	0	24
ASV_1065	0	0	0	0	0	0	0	0	0	0	0	0	0	0	0	0	0	0	0	0	0	0	0	0	24
ASV_1066	5	0	8	0	0	0	0	0	0	0	0	4	0	0	0	0	0	0	6	0	0	0	0	0	0
ASV_1067	5	0	5	3	0	0	0	0	0	0	0	6	0	0	4	0	0	0	0	0	0	0	0	0	0
ASV_1068	3	3	3	0	2	1	1	3	2	0	0	1	0	4	0	0	0	0	0	0	0	0	0	0	0
ASV_1069	0	14	0	0	0	0	0	0	0	9	0	0	0	0	0	0	0	0	0	0	0	0	0	0	0
ASV_1070	0	4	0	5	10	0	0	0	0	0	2	0	0	0	2	0	0	0	0	0	0	0	0	0	0
ASV_1071	0	0	23	0	0	0	0	0	0	0	0	0	0	0	0	0	0	0	0	0	0	0	0	0	0
ASV_1072	0	0	5	9	0	0	9	0	0	0	0	0	0	0	0	0	0	0	0	0	0	0	0	0	0
ASV_1073	0	0	4	0	0	0	0	0	0	0	0	0	9	10	0	0	0	0	0	0	0	0	0	0	0
ASV_1074	0	0	0	0	7	0	0	0	0	0	7	0	0	0	0	0	0	0	0	0	0	9	0	0	0
ASV_1075	0	0	0	0	0	0	15	0	0	0	0	0	8	0	0	0	0	0	0	0	0	0	0	0	0
ASV_1076	0	0	0	0	0	0	5	0	0	0	0	0	0	0	0	18	0	0	0	0	0	0	0	0	0
ASV_1077	0	0	0	0	0	0	0	2	0	2	0	10	9	0	0	0	0	0	0	0	0	0	0	0	0
ASV_1078	0	0	0	0	0	0	0	0	0	0	8	0	0	0	0	0	0	0	15	0	0	0	0	0	0
ASV_1079	0	0	0	0	0	0	0	0	0	0	2	0	0	0	0	0	0	0	21	0	0	0	0	0	0
ASV_1080	0	0	0	0	0	0	0	0	0	0	0	10	0	0	0	0	0	0	0	0	0	0	0	13	0
ASV_1081	0	0	0	0	0	0	0	0	0	0	0	0	8	0	0	0	0	0	0	0	0	15	0	0	0
ASV_1082	0	0	0	0	0	0	0	0	0	0	0	0	0	16	0	0	7	0	0	0	0	0	0	0	0
ASV_1083	0	0	0	0	0	0	0	0	0	0	0	0	0	0	8	0	0	0	0	0	0	0	0	0	15
ASV_1084	0	0	0	0	0	0	0	0	0	0	0	0	0	0	7	16	0	0	0	0	0	0	0	0	0
ASV_1085	0	0	0	0	0	0	0	0	0	0	0	0	0	0	0	0	23	0	0	0	0	0	0	0	0
ASV_1086	0	0	0	0	0	0	0	0	0	0	0	0	0	0	0	0	14	0	9	0	0	0	0	0	0
ASV_1087	0	0	0	0	0	0	0	0	0	0	0	0	0	0	0	0	11	0	0	0	0	12	0	0	0
ASV_1088	0	0	0	0	0	0	0	0	0	0	0	0	0	0	0	0	10	0	13	0	0	0	0	0	0
ASV_1089	0	0	0	0	0	0	0	0	0	0	0	0	0	0	0	0	7	0	16	0	0	0	0	0	0
ASV_1090	0	0	0	0	0	0	0	0	0	0	0	0	0	0	0	0	0	7	0	16	0	0	0	0	0
ASV_1091	0	0	0	0	0	0	0	0	0	0	0	0	0	0	0	0	0	0	8	6	0	9	0	0	0
ASV_1092	0	0	0	0	0	0	0	0	0	0	0	0	0	0	0	0	0	0	0	23	0	0	0	0	0
ASV_1093	0	0	0	0	0	0	0	0	0	0	0	0	0	0	0	0	0	0	0	23	0	0	0	0	0
ASV_1094	0	0	0	0	0	0	0	0	0	0	0	0	0	0	0	0	0	0	0	0	0	23	0	0	0
ASV_1095	0	0	0	0	0	0	0	0	0	0	0	0	0	0	0	0	0	0	0	0	0	23	0	0	0
ASV_1096	0	0	0	0	0	0	0	0	0	0	0	0	0	0	0	0	0	0	0	0	0	23	0	0	0
ASV_1097	0	0	0	0	0	0	0	0	0	0	0	0	0	0	0	0	0	0	0	0	0	23	0	0	0
ASV_1098	0	0	0	0	0	0	0	0	0	0	0	0	0	0	0	0	0	0	0	0	0	0	23	0	0
ASV_1099	0	0	0	0	0	0	0	0	0	0	0	0	0	0	0	0	0	0	0	0	0	0	23	0	0
ASV_1100	0	0	0	0	0	0	0	0	0	0	0	0	0	0	0	0	0	0	0	0	0	0	0	23	0
ASV_1101	0	0	0	0	0	0	0	0	0	0	0	0	0	0	0	0	0	0	0	0	0	0	0	23	0
ASV_1102	0	0	0	0	0	0	0	0	0	0	0	0	0	0	0	0	0	0	0	0	0	0	0	23	0
ASV_1103	0	0	0	0	0	0	0	0	0	0	0	0	0	0	0	0	0	0	0	0	0	0	0	0	23
ASV_1104	10	12	0	0	0	0	0	0	0	0	0	0	0	0	0	0	0	0	0	0	0	0	0	0	0
ASV_1105	1	0	1	4	1	0	0	0	0	2	7	3	2	0	1	0	0	0	0	0	0	0	0	0	0
ASV_1106	1	0	0	0	0	0	0	0	0	2	3	3	1	0	0	0	0	0	0	0	12	0	0	0	0
ASV_1107	0	5	0	0	0	0	0	0	0	0	0	11	6	0	0	0	0	0	0	0	0	0	0	0	0
ASV_1108	0	4	0	0	0	0	8	0	0	0	4	6	0	0	0	0	0	0	0	0	0	0	0	0	0
ASV_1109	0	0	9	0	13	0	0	0	0	0	0	0	0	0	0	0	0	0	0	0	0	0	0	0	0
ASV_1110	0	0	7	0	0	0	0	0	0	8	0	0	0	7	0	0	0	0	0	0	0	0	0	0	0
ASV_1111	0	0	0	5	10	0	0	7	0	0	0	0	0	0	0	0	0	0	0	0	0	0	0	0	0
ASV_1112	0	0	0	0	4	0	0	0	0	0	6	0	0	0	12	0	0	0	0	0	0	0	0	0	0
ASV_1113	0	0	0	0	4	0	0	0	4	0	0	0	5	5	4	0	0	0	0	0	0	0	0	0	0
ASV_1114	0	0	0	0	0	0	12	0	0	0	0	10	0	0	0	0	0	0	0	0	0	0	0	0	0
ASV_1115	0	0	0	0	0	0	0	5	0	5	0	0	6	0	6	0	0	0	0	0	0	0	0	0	0
ASV_1116	0	0	0	0	0	0	0	0	0	0	0	22	0	0	0	0	0	0	0	0	0	0	0	0	0
ASV_1117	0	0	0	0	0	0	0	0	0	0	0	17	0	0	0	0	0	0	0	5	0	0	0	0	0
ASV_1118	0	0	0	0	0	0	0	0	0	0	0	0	0	0	0	22	0	0	0	0	0	0	0	0	0
ASV_1119	0	0	0	0	0	0	0	0	0	0	0	0	0	0	0	22	0	0	0	0	0	0	0	0	0
ASV_1120	0	0	0	0	0	0	0	0	0	0	0	0	0	0	0	0	22	0	0	0	0	0	0	0	0
ASV_1121	0	0	0	0	0	0	0	0	0	0	0	0	0	0	0	0	0	0	22	0	0	0	0	0	0
ASV_1122	0	0	0	0	0	0	0	0	0	0	0	0	0	0	0	0	0	0	22	0	0	0	0	0	0
ASV_1123	0	0	0	0	0	0	0	0	0	0	0	0	0	0	0	0	0	0	7	0	0	0	0	15	0
ASV_1124	0	0	0	0	0	0	0	0	0	0	0	0	0	0	0	0	0	0	0	22	0	0	0	0	0
ASV_1125	0	0	0	0	0	0	0	0	0	0	0	0	0	0	0	0	0	0	0	0	10	0	0	12	0
ASV_1126	0	0	0	0	0	0	0	0	0	0	0	0	0	0	0	0	0	0	0	0	0	22	0	0	0
ASV_1127	0	0	0	0	0	0	0	0	0	0	0	0	0	0	0	0	0	0	0	0	0	22	0	0	0
ASV_1128	0	0	0	0	0	0	0	0	0	0	0	0	0	0	0	0	0	0	0	0	0	22	0	0	0
ASV_1129	0	0	0	0	0	0	0	0	0	0	0	0	0	0	0	0	0	0	0	0	0	22	0	0	0
ASV_1130	0	0	0	0	0	0	0	0	0	0	0	0	0	0	0	0	0	0	0	0	0	22	0	0	0
ASV_1131	0	0	0	0	0	0	0	0	0	0	0	0	0	0	0	0	0	0	0	0	0	22	0	0	0
ASV_1132	0	0	0	0	0	0	0	0	0	0	0	0	0	0	0	0	0	0	0	0	0	0	0	22	0
ASV_1133	0	0	0	0	0	0	0	0	0	0	0	0	0	0	0	0	0	0	0	0	0	0	0	22	0
ASV_1134	0	0	0	0	0	0	0	0	0	0	0	0	0	0	0	0	0	0	0	0	0	0	0	22	0
ASV_1135	0	0	0	0	0	0	0	0	0	0	0	0	0	0	0	0	0	0	0	0	0	0	0	0	22
ASV_1136	0	0	0	0	0	0	0	0	0	0	0	0	0	0	0	0	0	0	0	0	0	0	0	0	22
ASV_1137	6	0	0	0	0	0	0	0	0	0	0	7	0	0	8	0	0	0	0	0	0	0	0	0	0
ASV_1138	2	0	0	4	0	0	4	3	0	0	8	0	0	0	0	0	0	0	0	0	0	0	0	0	0
ASV_1139	0	17	0	0	0	0	0	0	0	0	4	0	0	0	0	0	0	0	0	0	0	0	0	0	0
ASV_1140	0	7	0	8	6	0	0	0	0	0	0	0	0	0	0	0	0	0	0	0	0	0	0	0	0
ASV_1141	0	5	0	0	0	0	0	0	0	0	0	0	0	0	0	3	6	0	0	0	0	0	0	7	0
ASV_1142	0	0	6	0	5	0	4	0	0	0	0	0	0	0	0	0	0	0	0	6	0	0	0	0	0
ASV_1143	0	0	6	0	0	0	0	0	0	0	0	0	0	0	0	15	0	0	0	0	0	0	0	0	0
ASV_1144	0	0	0	10	0	0	0	0	0	0	0	0	0	0	0	0	0	0	0	11	0	0	0	0	0
ASV_1145	0	0	0	6	0	0	0	0	0	0	0	4	2	0	9	0	0	0	0	0	0	0	0	0	0
ASV_1146	0	0	0	0	0	0	0	0	0	0	0	21	0	0	0	0	0	0	0	0	0	0	0	0	0
ASV_1147	0	0	0	0	0	0	0	0	0	0	0	5	0	0	6	0	0	0	0	10	0	0	0	0	0
ASV_1148	0	0	0	0	0	0	0	0	0	0	0	5	9	0	5	0	0	2	0	0	0	0	0	0	0
ASV_1149	0	0	0	0	0	0	0	0	0	0	0	0	12	0	9	0	0	0	0	0	0	0	0	0	0
ASV_1150	0	0	0	0	0	0	0	0	0	0	0	0	0	0	21	0	0	0	0	0	0	0	0	0	0
ASV_1151	0	0	0	0	0	0	0	0	0	0	0	0	0	0	0	21	0	0	0	0	0	0	0	0	0
ASV_1152	0	0	0	0	0	0	0	0	0	0	0	0	0	0	0	21	0	0	0	0	0	0	0	0	0
ASV_1153	0	0	0	0	0	0	0	0	0	0	0	0	0	0	0	10	0	0	11	0	0	0	0	0	0
ASV_1154	0	0	0	0	0	0	0	0	0	0	0	0	0	0	0	0	21	0	0	0	0	0	0	0	0
ASV_1155	0	0	0	0	0	0	0	0	0	0	0	0	0	0	0	0	21	0	0	0	0	0	0	0	0
ASV_1156	0	0	0	0	0	0	0	0	0	0	0	0	0	0	0	0	13	0	0	0	8	0	0	0	0
ASV_1157	0	0	0	0	0	0	0	0	0	0	0	0	0	0	0	0	0	8	0	13	0	0	0	0	0
ASV_1158	0	0	0	0	0	0	0	0	0	0	0	0	0	0	0	0	0	0	21	0	0	0	0	0	0
ASV_1159	0	0	0	0	0	0	0	0	0	0	0	0	0	0	0	0	0	0	0	21	0	0	0	0	0
ASV_1160	0	0	0	0	0	0	0	0	0	0	0	0	0	0	0	0	0	0	0	21	0	0	0	0	0
ASV_1161	0	0	0	0	0	0	0	0	0	0	0	0	0	0	0	0	0	0	0	21	0	0	0	0	0
ASV_1162	0	0	0	0	0	0	0	0	0	0	0	0	0	0	0	0	0	0	0	0	21	0	0	0	0
ASV_1163	0	0	0	0	0	0	0	0	0	0	0	0	0	0	0	0	0	0	0	0	21	0	0	0	0
ASV_1164	0	0	0	0	0	0	0	0	0	0	0	0	0	0	0	0	0	0	0	0	0	21	0	0	0
ASV_1165	0	0	0	0	0	0	0	0	0	0	0	0	0	0	0	0	0	0	0	0	0	21	0	0	0
ASV_1166	0	0	0	0	0	0	0	0	0	0	0	0	0	0	0	0	0	0	0	0	0	21	0	0	0
ASV_1167	0	0	0	0	0	0	0	0	0	0	0	0	0	0	0	0	0	0	0	0	0	0	21	0	0
ASV_1168	0	0	0	0	0	0	0	0	0	0	0	0	0	0	0	0	0	0	0	0	0	0	0	21	0
ASV_1169	0	0	0	0	0	0	0	0	0	0	0	0	0	0	0	0	0	0	0	0	0	0	0	21	0
ASV_1170	0	0	0	0	0	0	0	0	0	0	0	0	0	0	0	0	0	0	0	0	0	0	0	21	0
ASV_1171	0	0	0	0	0	0	0	0	0	0	0	0	0	0	0	0	0	0	0	0	0	0	0	0	21
ASV_1172	0	0	0	0	0	0	0	0	0	0	0	0	0	0	0	0	0	0	0	0	0	0	0	0	21
ASV_1173	0	0	0	0	0	0	0	0	0	0	0	0	0	0	0	0	0	0	0	0	0	0	0	0	21
ASV_1174	20	0	0	0	0	0	0	0	0	0	0	0	0	0	0	0	0	0	0	0	0	0	0	0	0
ASV_1175	1	0	7	0	6	0	0	0	0	0	0	1	2	0	3	0	0	0	0	0	0	0	0	0	0
ASV_1176	0	0	0	7	0	0	0	0	0	13	0	0	0	0	0	0	0	0	0	0	0	0	0	0	0
ASV_1177	0	0	0	5	0	0	4	0	3	0	0	3	5	0	0	0	0	0	0	0	0	0	0	0	0
ASV_1178	0	0	0	3	0	0	0	3	0	0	0	9	5	0	0	0	0	0	0	0	0	0	0	0	0
ASV_1179	0	0	0	0	0	0	5	0	0	0	0	0	0	0	0	0	0	0	0	0	0	15	0	0	0
ASV_1180	0	0	0	0	0	0	0	20	0	0	0	0	0	0	0	0	0	0	0	0	0	0	0	0	0
ASV_1181	0	0	0	0	0	0	0	0	0	0	0	20	0	0	0	0	0	0	0	0	0	0	0	0	0
ASV_1182	0	0	0	0	0	0	0	0	0	0	0	20	0	0	0	0	0	0	0	0	0	0	0	0	0
ASV_1183	0	0	0	0	0	0	0	0	0	0	0	0	0	0	0	20	0	0	0	0	0	0	0	0	0
ASV_1184	0	0	0	0	0	0	0	0	0	0	0	0	0	0	0	20	0	0	0	0	0	0	0	0	0
ASV_1185	0	0	0	0	0	0	0	0	0	0	0	0	0	0	0	14	0	0	6	0	0	0	0	0	0
ASV_1186	0	0	0	0	0	0	0	0	0	0	0	0	0	0	0	13	0	7	0	0	0	0	0	0	0
ASV_1187	0	0	0	0	0	0	0	0	0	0	0	0	0	0	0	7	0	13	0	0	0	0	0	0	0
ASV_1188	0	0	0	0	0	0	0	0	0	0	0	0	0	0	0	0	12	8	0	0	0	0	0	0	0
ASV_1189	0	0	0	0	0	0	0	0	0	0	0	0	0	0	0	0	5	0	0	0	0	15	0	0	0
ASV_1190	0	0	0	0	0	0	0	0	0	0	0	0	0	0	0	0	0	0	20	0	0	0	0	0	0
ASV_1191	0	0	0	0	0	0	0	0	0	0	0	0	0	0	0	0	0	0	0	20	0	0	0	0	0
ASV_1192	0	0	0	0	0	0	0	0	0	0	0	0	0	0	0	0	0	0	0	0	20	0	0	0	0
ASV_1193	0	0	0	0	0	0	0	0	0	0	0	0	0	0	0	0	0	0	0	0	20	0	0	0	0
ASV_1194	0	0	0	0	0	0	0	0	0	0	0	0	0	0	0	0	0	0	0	0	20	0	0	0	0
ASV_1195	0	0	0	0	0	0	0	0	0	0	0	0	0	0	0	0	0	0	0	0	20	0	0	0	0
ASV_1196	0	0	0	0	0	0	0	0	0	0	0	0	0	0	0	0	0	0	0	0	0	20	0	0	0
ASV_1197	0	0	0	0	0	0	0	0	0	0	0	0	0	0	0	0	0	0	0	0	0	20	0	0	0
ASV_1198	0	0	0	0	0	0	0	0	0	0	0	0	0	0	0	0	0	0	0	0	0	20	0	0	0
ASV_1199	0	0	0	0	0	0	0	0	0	0	0	0	0	0	0	0	0	0	0	0	0	20	0	0	0
ASV_1200	0	0	0	0	0	0	0	0	0	0	0	0	0	0	0	0	0	0	0	0	0	20	0	0	0
ASV_1201	0	0	0	0	0	0	0	0	0	0	0	0	0	0	0	0	0	0	0	0	0	20	0	0	0
ASV_1202	0	0	0	0	0	0	0	0	0	0	0	0	0	0	0	0	0	0	0	0	0	20	0	0	0
ASV_1203	0	0	0	0	0	0	0	0	0	0	0	0	0	0	0	0	0	0	0	0	0	20	0	0	0
ASV_1204	0	0	0	0	0	0	0	0	0	0	0	0	0	0	0	0	0	0	0	0	0	0	20	0	0
ASV_1205	0	0	0	0	0	0	0	0	0	0	0	0	0	0	0	0	0	0	0	0	0	0	0	20	0
ASV_1206	0	0	0	0	0	0	0	0	0	0	0	0	0	0	0	0	0	0	0	0	0	0	0	20	0
ASV_1207	0	0	0	0	0	0	0	0	0	0	0	0	0	0	0	0	0	0	0	0	0	0	0	20	0
ASV_1208	0	0	0	0	0	0	0	0	0	0	0	0	0	0	0	0	0	0	0	0	0	0	0	20	0
ASV_1209	0	0	0	0	0	0	0	0	0	0	0	0	0	0	0	0	0	0	0	0	0	0	0	0	20
ASV_1210	0	0	0	0	0	0	0	0	0	0	0	0	0	0	0	0	0	0	0	0	0	0	0	0	20
ASV_1211	0	0	0	0	0	0	0	0	0	0	0	0	0	0	0	0	0	0	0	0	0	0	0	0	20
ASV_1212	0	0	0	0	0	0	0	0	0	0	0	0	0	0	0	0	0	0	0	0	0	0	0	0	20
ASV_1213	11	0	8	0	0	0	0	0	0	0	0	0	0	0	0	0	0	0	0	0	0	0	0	0	0
ASV_1214	4	0	0	0	0	0	0	0	0	0	0	0	11	0	4	0	0	0	0	0	0	0	0	0	0
ASV_1215	1	0	0	0	3	0	0	0	0	0	0	2	6	7	0	0	0	0	0	0	0	0	0	0	0
ASV_1216	0	6	0	0	4	0	6	0	0	0	0	0	0	0	3	0	0	0	0	0	0	0	0	0	0
ASV_1217	0	0	8	0	0	0	3	0	1	0	1	0	1	1	1	0	0	0	0	3	0	0	0	0	0
ASV_1218	0	0	5	0	0	0	0	0	13	0	0	0	1	0	0	0	0	0	0	0	0	0	0	0	0
ASV_1219	0	0	4	0	0	0	0	0	0	0	6	0	9	0	0	0	0	0	0	0	0	0	0	0	0
ASV_1220	0	0	3	4	4	0	8	0	0	0	0	0	0	0	0	0	0	0	0	0	0	0	0	0	0
ASV_1221	0	0	0	11	0	0	0	0	0	0	0	0	0	0	0	0	0	0	0	8	0	0	0	0	0
ASV_1222	0	0	0	7	0	6	6	0	0	0	0	0	0	0	0	0	0	0	0	0	0	0	0	0	0
ASV_1223	0	0	0	0	19	0	0	0	0	0	0	0	0	0	0	0	0	0	0	0	0	0	0	0	0
ASV_1224	0	0	0	0	7	0	0	0	0	0	0	0	4	8	0	0	0	0	0	0	0	0	0	0	0
ASV_1225	0	0	0	0	0	13	6	0	0	0	0	0	0	0	0	0	0	0	0	0	0	0	0	0	0
ASV_1226	0	0	0	0	0	0	0	6	0	0	4	0	0	0	0	0	0	0	0	0	0	0	0	9	0
ASV_1227	0	0	0	0	0	0	0	0	0	0	0	0	0	19	0	0	0	0	0	0	0	0	0	0	0
ASV_1228	0	0	0	0	0	0	0	0	0	0	0	0	0	19	0	0	0	0	0	0	0	0	0	0	0
ASV_1229	0	0	0	0	0	0	0	0	0	0	0	0	0	7	12	0	0	0	0	0	0	0	0	0	0
ASV_1230	0	0	0	0	0	0	0	0	0	0	0	0	0	0	3	16	0	0	0	0	0	0	0	0	0
ASV_1231	0	0	0	0	0	0	0	0	0	0	0	0	0	0	0	19	0	0	0	0	0	0	0	0	0
ASV_1232	0	0	0	0	0	0	0	0	0	0	0	0	0	0	0	19	0	0	0	0	0	0	0	0	0
ASV_1233	0	0	0	0	0	0	0	0	0	0	0	0	0	0	0	19	0	0	0	0	0	0	0	0	0
ASV_1234	0	0	0	0	0	0	0	0	0	0	0	0	0	0	0	19	0	0	0	0	0	0	0	0	0
ASV_1235	0	0	0	0	0	0	0	0	0	0	0	0	0	0	0	19	0	0	0	0	0	0	0	0	0
ASV_1236	0	0	0	0	0	0	0	0	0	0	0	0	0	0	0	0	19	0	0	0	0	0	0	0	0
ASV_1237	0	0	0	0	0	0	0	0	0	0	0	0	0	0	0	0	19	0	0	0	0	0	0	0	0
ASV_1238	0	0	0	0	0	0	0	0	0	0	0	0	0	0	0	0	0	19	0	0	0	0	0	0	0
ASV_1239	0	0	0	0	0	0	0	0	0	0	0	0	0	0	0	0	0	9	0	0	10	0	0	0	0
ASV_1240	0	0	0	0	0	0	0	0	0	0	0	0	0	0	0	0	0	0	19	0	0	0	0	0	0
ASV_1241	0	0	0	0	0	0	0	0	0	0	0	0	0	0	0	0	0	0	19	0	0	0	0	0	0
ASV_1242	0	0	0	0	0	0	0	0	0	0	0	0	0	0	0	0	0	0	7	12	0	0	0	0	0
ASV_1243	0	0	0	0	0	0	0	0	0	0	0	0	0	0	0	0	0	0	0	19	0	0	0	0	0
ASV_1244	0	0	0	0	0	0	0	0	0	0	0	0	0	0	0	0	0	0	0	19	0	0	0	0	0
ASV_1245	0	0	0	0	0	0	0	0	0	0	0	0	0	0	0	0	0	0	0	0	19	0	0	0	0
ASV_1246	0	0	0	0	0	0	0	0	0	0	0	0	0	0	0	0	0	0	0	0	19	0	0	0	0
ASV_1247	0	0	0	0	0	0	0	0	0	0	0	0	0	0	0	0	0	0	0	0	19	0	0	0	0
ASV_1248	0	0	0	0	0	0	0	0	0	0	0	0	0	0	0	0	0	0	0	0	19	0	0	0	0
ASV_1249	0	0	0	0	0	0	0	0	0	0	0	0	0	0	0	0	0	0	0	0	19	0	0	0	0
ASV_1250	0	0	0	0	0	0	0	0	0	0	0	0	0	0	0	0	0	0	0	0	0	19	0	0	0
ASV_1251	0	0	0	0	0	0	0	0	0	0	0	0	0	0	0	0	0	0	0	0	0	19	0	0	0
ASV_1252	0	0	0	0	0	0	0	0	0	0	0	0	0	0	0	0	0	0	0	0	0	19	0	0	0
ASV_1253	0	0	0	0	0	0	0	0	0	0	0	0	0	0	0	0	0	0	0	0	0	19	0	0	0
ASV_1254	0	0	0	0	0	0	0	0	0	0	0	0	0	0	0	0	0	0	0	0	0	19	0	0	0
ASV_1255	0	0	0	0	0	0	0	0	0	0	0	0	0	0	0	0	0	0	0	0	0	19	0	0	0
ASV_1256	0	0	0	0	0	0	0	0	0	0	0	0	0	0	0	0	0	0	0	0	0	19	0	0	0
ASV_1257	0	0	0	0	0	0	0	0	0	0	0	0	0	0	0	0	0	0	0	0	0	0	0	19	0
ASV_1258	0	0	0	0	0	0	0	0	0	0	0	0	0	0	0	0	0	0	0	0	0	0	0	19	0
ASV_1259	0	0	0	0	0	0	0	0	0	0	0	0	0	0	0	0	0	0	0	0	0	0	0	19	0
ASV_1260	0	0	0	0	0	0	0	0	0	0	0	0	0	0	0	0	0	0	0	0	0	0	0	19	0
ASV_1261	0	0	0	0	0	0	0	0	0	0	0	0	0	0	0	0	0	0	0	0	0	0	0	19	0
ASV_1262	0	0	0	0	0	0	0	0	0	0	0	0	0	0	0	0	0	0	0	0	0	0	0	19	0
ASV_1263	0	0	0	0	0	0	0	0	0	0	0	0	0	0	0	0	0	0	0	0	0	0	0	19	0
ASV_1264	0	0	0	0	0	0	0	0	0	0	0	0	0	0	0	0	0	0	0	0	0	0	0	19	0
ASV_1265	0	0	0	0	0	0	0	0	0	0	0	0	0	0	0	0	0	0	0	0	0	0	0	0	19
ASV_1266	0	0	0	0	0	0	0	0	0	0	0	0	0	0	0	0	0	0	0	0	0	0	0	0	19
ASV_1267	0	0	0	0	0	0	0	0	0	0	0	0	0	0	0	0	0	0	0	0	0	0	0	0	19
ASV_1268	0	0	0	0	0	0	0	0	0	0	0	0	0	0	0	0	0	0	0	0	0	0	0	0	19
ASV_1269	11	0	0	0	0	0	0	0	0	0	0	0	0	0	7	0	0	0	0	0	0	0	0	0	0
ASV_1270	6	0	0	0	0	0	0	0	0	0	0	3	0	0	0	0	0	0	9	0	0	0	0	0	0
ASV_1271	5	7	0	0	0	0	0	0	3	0	0	0	3	0	0	0	0	0	0	0	0	0	0	0	0
ASV_1272	3	3	0	0	0	0	4	0	0	0	3	2	0	3	0	0	0	0	0	0	0	0	0	0	0
ASV_1273	2	2	1	4	0	2	0	0	1	0	0	0	0	4	2	0	0	0	0	0	0	0	0	0	0
ASV_1274	0	9	0	0	0	0	0	0	0	0	0	0	9	0	0	0	0	0	0	0	0	0	0	0	0
ASV_1275	0	7	3	0	0	4	4	0	0	0	0	0	0	0	0	0	0	0	0	0	0	0	0	0	0
ASV_1276	0	3	7	0	0	0	0	0	0	0	0	0	0	0	0	8	0	0	0	0	0	0	0	0	0
ASV_1277	0	0	9	3	0	0	6	0	0	0	0	0	0	0	0	0	0	0	0	0	0	0	0	0	0
ASV_1278	0	0	7	0	0	0	11	0	0	0	0	0	0	0	0	0	0	0	0	0	0	0	0	0	0
ASV_1279	0	0	5	0	0	0	6	0	2	0	0	5	0	0	0	0	0	0	0	0	0	0	0	0	0
ASV_1280	0	0	3	0	3	0	0	0	0	0	3	0	0	0	0	0	0	0	0	9	0	0	0	0	0
ASV_1281	0	0	0	2	0	0	0	4	3	6	1	1	1	0	0	0	0	0	0	0	0	0	0	0	0
ASV_1282	0	0	0	0	0	2	0	0	0	0	6	2	5	1	2	0	0	0	0	0	0	0	0	0	0
ASV_1283	0	0	0	0	0	0	18	0	0	0	0	0	0	0	0	0	0	0	0	0	0	0	0	0	0
ASV_1284	0	0	0	0	0	0	7	0	0	0	0	7	0	4	0	0	0	0	0	0	0	0	0	0	0
ASV_1285	0	0	0	0	0	0	0	0	0	0	18	0	0	0	0	0	0	0	0	0	0	0	0	0	0
ASV_1286	0	0	0	0	0	0	0	0	0	0	0	18	0	0	0	0	0	0	0	0	0	0	0	0	0
ASV_1287	0	0	0	0	0	0	0	0	0	0	0	0	7	0	6	5	0	0	0	0	0	0	0	0	0
ASV_1288	0	0	0	0	0	0	0	0	0	0	0	0	0	9	0	0	0	0	0	0	0	0	0	9	0
ASV_1289	0	0	0	0	0	0	0	0	0	0	0	0	0	5	9	4	0	0	0	0	0	0	0	0	0
ASV_1290	0	0	0	0	0	0	0	0	0	0	0	0	0	0	0	18	0	0	0	0	0	0	0	0	0
ASV_1291	0	0	0	0	0	0	0	0	0	0	0	0	0	0	0	18	0	0	0	0	0	0	0	0	0
ASV_1292	0	0	0	0	0	0	0	0	0	0	0	0	0	0	0	18	0	0	0	0	0	0	0	0	0
ASV_1293	0	0	0	0	0	0	0	0	0	0	0	0	0	0	0	18	0	0	0	0	0	0	0	0	0
ASV_1294	0	0	0	0	0	0	0	0	0	0	0	0	0	0	0	18	0	0	0	0	0	0	0	0	0
ASV_1295	0	0	0	0	0	0	0	0	0	0	0	0	0	0	0	0	18	0	0	0	0	0	0	0	0
ASV_1296	0	0	0	0	0	0	0	0	0	0	0	0	0	0	0	0	14	0	4	0	0	0	0	0	0
ASV_1297	0	0	0	0	0	0	0	0	0	0	0	0	0	0	0	0	9	0	0	9	0	0	0	0	0
ASV_1298	0	0	0	0	0	0	0	0	0	0	0	0	0	0	0	0	0	10	0	0	8	0	0	0	0
ASV_1299	0	0	0	0	0	0	0	0	0	0	0	0	0	0	0	0	0	0	18	0	0	0	0	0	0
ASV_1300	0	0	0	0	0	0	0	0	0	0	0	0	0	0	0	0	0	0	18	0	0	0	0	0	0
ASV_1301	0	0	0	0	0	0	0	0	0	0	0	0	0	0	0	0	0	0	18	0	0	0	0	0	0
ASV_1302	0	0	0	0	0	0	0	0	0	0	0	0	0	0	0	0	0	0	18	0	0	0	0	0	0
ASV_1303	0	0	0	0	0	0	0	0	0	0	0	0	0	0	0	0	0	0	13	5	0	0	0	0	0
ASV_1304	0	0	0	0	0	0	0	0	0	0	0	0	0	0	0	0	0	0	0	18	0	0	0	0	0
ASV_1305	0	0	0	0	0	0	0	0	0	0	0	0	0	0	0	0	0	0	0	18	0	0	0	0	0
ASV_1306	0	0	0	0	0	0	0	0	0	0	0	0	0	0	0	0	0	0	0	18	0	0	0	0	0
ASV_1307	0	0	0	0	0	0	0	0	0	0	0	0	0	0	0	0	0	0	0	0	18	0	0	0	0
ASV_1308	0	0	0	0	0	0	0	0	0	0	0	0	0	0	0	0	0	0	0	0	18	0	0	0	0
ASV_1309	0	0	0	0	0	0	0	0	0	0	0	0	0	0	0	0	0	0	0	0	18	0	0	0	0
ASV_1310	0	0	0	0	0	0	0	0	0	0	0	0	0	0	0	0	0	0	0	0	18	0	0	0	0
ASV_1311	0	0	0	0	0	0	0	0	0	0	0	0	0	0	0	0	0	0	0	0	18	0	0	0	0
ASV_1312	0	0	0	0	0	0	0	0	0	0	0	0	0	0	0	0	0	0	0	0	0	18	0	0	0
ASV_1313	0	0	0	0	0	0	0	0	0	0	0	0	0	0	0	0	0	0	0	0	0	18	0	0	0
ASV_1314	0	0	0	0	0	0	0	0	0	0	0	0	0	0	0	0	0	0	0	0	0	18	0	0	0
ASV_1315	0	0	0	0	0	0	0	0	0	0	0	0	0	0	0	0	0	0	0	0	0	18	0	0	0
ASV_1316	0	0	0	0	0	0	0	0	0	0	0	0	0	0	0	0	0	0	0	0	0	18	0	0	0
ASV_1317	0	0	0	0	0	0	0	0	0	0	0	0	0	0	0	0	0	0	0	0	0	18	0	0	0
ASV_1318	0	0	0	0	0	0	0	0	0	0	0	0	0	0	0	0	0	0	0	0	0	18	0	0	0
ASV_1319	0	0	0	0	0	0	0	0	0	0	0	0	0	0	0	0	0	0	0	0	0	18	0	0	0
ASV_1320	0	0	0	0	0	0	0	0	0	0	0	0	0	0	0	0	0	0	0	0	0	0	18	0	0
ASV_1321	0	0	0	0	0	0	0	0	0	0	0	0	0	0	0	0	0	0	0	0	0	0	18	0	0
ASV_1322	0	0	0	0	0	0	0	0	0	0	0	0	0	0	0	0	0	0	0	0	0	0	18	0	0
ASV_1323	0	0	0	0	0	0	0	0	0	0	0	0	0	0	0	0	0	0	0	0	0	0	0	18	0
ASV_1324	0	0	0	0	0	0	0	0	0	0	0	0	0	0	0	0	0	0	0	0	0	0	0	18	0
ASV_1325	0	0	0	0	0	0	0	0	0	0	0	0	0	0	0	0	0	0	0	0	0	0	0	18	0
ASV_1326	0	0	0	0	0	0	0	0	0	0	0	0	0	0	0	0	0	0	0	0	0	0	0	18	0
ASV_1327	0	0	0	0	0	0	0	0	0	0	0	0	0	0	0	0	0	0	0	0	0	0	0	0	18
ASV_1328	0	0	0	0	0	0	0	0	0	0	0	0	0	0	0	0	0	0	0	0	0	0	0	0	18
ASV_1329	17	0	0	0	0	0	0	0	0	0	0	0	0	0	0	0	0	0	0	0	0	0	0	0	0
ASV_1330	0	6	0	0	0	0	0	5	0	6	0	0	0	0	0	0	0	0	0	0	0	0	0	0	0
ASV_1331	0	4	0	0	0	0	0	0	0	0	0	13	0	0	0	0	0	0	0	0	0	0	0	0	0
ASV_1332	0	0	17	0	0	0	0	0	0	0	0	0	0	0	0	0	0	0	0	0	0	0	0	0	0
ASV_1333	0	0	0	17	0	0	0	0	0	0	0	0	0	0	0	0	0	0	0	0	0	0	0	0	0
ASV_1334	0	0	0	4	0	0	0	0	0	0	3	5	2	0	3	0	0	0	0	0	0	0	0	0	0
ASV_1335	0	0	0	0	0	0	6	0	0	0	0	0	0	0	0	0	0	0	0	0	11	0	0	0	0
ASV_1336	0	0	0	0	0	0	4	0	0	0	6	0	7	0	0	0	0	0	0	0	0	0	0	0	0
ASV_1337	0	0	0	0	0	0	0	17	0	0	0	0	0	0	0	0	0	0	0	0	0	0	0	0	0
ASV_1338	0	0	0	0	0	0	0	4	0	0	0	0	0	4	0	0	0	5	0	4	0	0	0	0	0
ASV_1339	0	0	0	0	0	0	0	4	0	0	0	0	0	0	0	0	0	0	0	0	13	0	0	0	0
ASV_1340	0	0	0	0	0	0	0	0	0	0	7	0	10	0	0	0	0	0	0	0	0	0	0	0	0
ASV_1341	0	0	0	0	0	0	0	0	0	0	0	0	8	8	0	1	0	0	0	0	0	0	0	0	0
ASV_1342	0	0	0	0	0	0	0	0	0	0	0	0	8	0	0	0	0	0	9	0	0	0	0	0	0
ASV_1343	0	0	0	0	0	0	0	0	0	0	0	0	0	17	0	0	0	0	0	0	0	0	0	0	0
ASV_1344	0	0	0	0	0	0	0	0	0	0	0	0	0	0	2	7	8	0	0	0	0	0	0	0	0
ASV_1345	0	0	0	0	0	0	0	0	0	0	0	0	0	0	0	17	0	0	0	0	0	0	0	0	0
ASV_1346	0	0	0	0	0	0	0	0	0	0	0	0	0	0	0	17	0	0	0	0	0	0	0	0	0
ASV_1347	0	0	0	0	0	0	0	0	0	0	0	0	0	0	0	17	0	0	0	0	0	0	0	0	0
ASV_1348	0	0	0	0	0	0	0	0	0	0	0	0	0	0	0	17	0	0	0	0	0	0	0	0	0
ASV_1349	0	0	0	0	0	0	0	0	0	0	0	0	0	0	0	0	17	0	0	0	0	0	0	0	0
ASV_1350	0	0	0	0	0	0	0	0	0	0	0	0	0	0	0	0	17	0	0	0	0	0	0	0	0
ASV_1351	0	0	0	0	0	0	0	0	0	0	0	0	0	0	0	0	17	0	0	0	0	0	0	0	0
ASV_1352	0	0	0	0	0	0	0	0	0	0	0	0	0	0	0	0	17	0	0	0	0	0	0	0	0
ASV_1353	0	0	0	0	0	0	0	0	0	0	0	0	0	0	0	0	17	0	0	0	0	0	0	0	0
ASV_1354	0	0	0	0	0	0	0	0	0	0	0	0	0	0	0	0	17	0	0	0	0	0	0	0	0
ASV_1355	0	0	0	0	0	0	0	0	0	0	0	0	0	0	0	0	9	0	0	0	0	8	0	0	0
ASV_1356	0	0	0	0	0	0	0	0	0	0	0	0	0	0	0	0	8	9	0	0	0	0	0	0	0
ASV_1357	0	0	0	0	0	0	0	0	0	0	0	0	0	0	0	0	6	0	11	0	0	0	0	0	0
ASV_1358	0	0	0	0	0	0	0	0	0	0	0	0	0	0	0	0	0	7	10	0	0	0	0	0	0
ASV_1359	0	0	0	0	0	0	0	0	0	0	0	0	0	0	0	0	0	7	0	10	0	0	0	0	0
ASV_1360	0	0	0	0	0	0	0	0	0	0	0	0	0	0	0	0	0	0	17	0	0	0	0	0	0
ASV_1361	0	0	0	0	0	0	0	0	0	0	0	0	0	0	0	0	0	0	17	0	0	0	0	0	0
ASV_1362	0	0	0	0	0	0	0	0	0	0	0	0	0	0	0	0	0	0	0	17	0	0	0	0	0
ASV_1363	0	0	0	0	0	0	0	0	0	0	0	0	0	0	0	0	0	0	0	17	0	0	0	0	0
ASV_1364	0	0	0	0	0	0	0	0	0	0	0	0	0	0	0	0	0	0	0	17	0	0	0	0	0
ASV_1365	0	0	0	0	0	0	0	0	0	0	0	0	0	0	0	0	0	0	0	17	0	0	0	0	0
ASV_1366	0	0	0	0	0	0	0	0	0	0	0	0	0	0	0	0	0	0	0	17	0	0	0	0	0
ASV_1367	0	0	0	0	0	0	0	0	0	0	0	0	0	0	0	0	0	0	0	7	10	0	0	0	0
ASV_1368	0	0	0	0	0	0	0	0	0	0	0	0	0	0	0	0	0	0	0	0	17	0	0	0	0
ASV_1369	0	0	0	0	0	0	0	0	0	0	0	0	0	0	0	0	0	0	0	0	17	0	0	0	0
ASV_1370	0	0	0	0	0	0	0	0	0	0	0	0	0	0	0	0	0	0	0	0	17	0	0	0	0
ASV_1371	0	0	0	0	0	0	0	0	0	0	0	0	0	0	0	0	0	0	0	0	17	0	0	0	0
ASV_1372	0	0	0	0	0	0	0	0	0	0	0	0	0	0	0	0	0	0	0	0	17	0	0	0	0
ASV_1373	0	0	0	0	0	0	0	0	0	0	0	0	0	0	0	0	0	0	0	0	0	17	0	0	0
ASV_1374	0	0	0	0	0	0	0	0	0	0	0	0	0	0	0	0	0	0	0	0	0	17	0	0	0
ASV_1375	0	0	0	0	0	0	0	0	0	0	0	0	0	0	0	0	0	0	0	0	0	17	0	0	0
ASV_1376	0	0	0	0	0	0	0	0	0	0	0	0	0	0	0	0	0	0	0	0	0	17	0	0	0
ASV_1377	0	0	0	0	0	0	0	0	0	0	0	0	0	0	0	0	0	0	0	0	0	0	17	0	0
ASV_1378	0	0	0	0	0	0	0	0	0	0	0	0	0	0	0	0	0	0	0	0	0	0	17	0	0
ASV_1379	0	0	0	0	0	0	0	0	0	0	0	0	0	0	0	0	0	0	0	0	0	0	0	17	0
ASV_1380	0	0	0	0	0	0	0	0	0	0	0	0	0	0	0	0	0	0	0	0	0	0	0	17	0
ASV_1381	0	0	0	0	0	0	0	0	0	0	0	0	0	0	0	0	0	0	0	0	0	0	0	17	0
ASV_1382	0	0	0	0	0	0	0	0	0	0	0	0	0	0	0	0	0	0	0	0	0	0	0	17	0
ASV_1383	0	0	0	0	0	0	0	0	0	0	0	0	0	0	0	0	0	0	0	0	0	0	0	17	0
ASV_1384	0	0	0	0	0	0	0	0	0	0	0	0	0	0	0	0	0	0	0	0	0	0	0	17	0
ASV_1385	0	0	0	0	0	0	0	0	0	0	0	0	0	0	0	0	0	0	0	0	0	0	0	17	0
ASV_1386	0	0	0	0	0	0	0	0	0	0	0	0	0	0	0	0	0	0	0	0	0	0	0	0	17
ASV_1387	0	0	0	0	0	0	0	0	0	0	0	0	0	0	0	0	0	0	0	0	0	0	0	0	17
ASV_1388	0	0	0	0	0	0	0	0	0	0	0	0	0	0	0	0	0	0	0	0	0	0	0	0	17
ASV_1389	0	0	0	0	0	0	0	0	0	0	0	0	0	0	0	0	0	0	0	0	0	0	0	0	17
ASV_1390	16	0	0	0	0	0	0	0	0	0	0	0	0	0	0	0	0	0	0	0	0	0	0	0	0
ASV_1391	2	0	2	0	7	0	0	2	0	3	0	0	0	0	0	0	0	0	0	0	0	0	0	0	0
ASV_1392	1	0	0	3	8	0	0	0	0	0	0	0	0	0	4	0	0	0	0	0	0	0	0	0	0
ASV_1393	0	4	0	0	2	5	0	0	0	3	0	0	1	1	0	0	0	0	0	0	0	0	0	0	0
ASV_1394	0	4	0	0	6	0	0	0	0	0	0	0	0	0	0	0	0	6	0	0	0	0	0	0	0
ASV_1395	0	2	0	0	0	0	0	0	6	0	0	7	1	0	0	0	0	0	0	0	0	0	0	0	0
ASV_1396	0	0	1	6	1	3	0	0	0	3	1	0	1	0	0	0	0	0	0	0	0	0	0	0	0
ASV_1397	0	0	0	8	8	0	0	0	0	0	0	0	0	0	0	0	0	0	0	0	0	0	0	0	0
ASV_1398	0	0	0	0	16	0	0	0	0	0	0	0	0	0	0	0	0	0	0	0	0	0	0	0	0
ASV_1399	0	0	0	0	5	0	0	0	0	0	0	0	0	0	0	0	0	0	0	5	6	0	0	0	0
ASV_1400	0	0	0	0	0	0	0	0	0	16	0	0	0	0	0	0	0	0	0	0	0	0	0	0	0
ASV_1401	0	0	0	0	0	0	0	0	0	16	0	0	0	0	0	0	0	0	0	0	0	0	0	0	0
ASV_1402	0	0	0	0	0	0	0	0	0	0	0	9	0	0	7	0	0	0	0	0	0	0	0	0	0
ASV_1403	0	0	0	0	0	0	0	0	0	0	0	0	5	8	3	0	0	0	0	0	0	0	0	0	0
ASV_1404	0	0	0	0	0	0	0	0	0	0	0	0	0	0	16	0	0	0	0	0	0	0	0	0	0
ASV_1405	0	0	0	0	0	0	0	0	0	0	0	0	0	0	0	16	0	0	0	0	0	0	0	0	0
ASV_1406	0	0	0	0	0	0	0	0	0	0	0	0	0	0	0	16	0	0	0	0	0	0	0	0	0
ASV_1407	0	0	0	0	0	0	0	0	0	0	0	0	0	0	0	16	0	0	0	0	0	0	0	0	0
ASV_1408	0	0	0	0	0	0	0	0	0	0	0	0	0	0	0	0	16	0	0	0	0	0	0	0	0
ASV_1409	0	0	0	0	0	0	0	0	0	0	0	0	0	0	0	0	16	0	0	0	0	0	0	0	0
ASV_1410	0	0	0	0	0	0	0	0	0	0	0	0	0	0	0	0	16	0	0	0	0	0	0	0	0
ASV_1411	0	0	0	0	0	0	0	0	0	0	0	0	0	0	0	0	16	0	0	0	0	0	0	0	0
ASV_1412	0	0	0	0	0	0	0	0	0	0	0	0	0	0	0	0	16	0	0	0	0	0	0	0	0
ASV_1413	0	0	0	0	0	0	0	0	0	0	0	0	0	0	0	0	12	0	0	4	0	0	0	0	0
ASV_1414	0	0	0	0	0	0	0	0	0	0	0	0	0	0	0	0	6	0	0	0	0	0	0	10	0
ASV_1415	0	0	0	0	0	0	0	0	0	0	0	0	0	0	0	0	0	16	0	0	0	0	0	0	0
ASV_1416	0	0	0	0	0	0	0	0	0	0	0	0	0	0	0	0	0	16	0	0	0	0	0	0	0
ASV_1417	0	0	0	0	0	0	0	0	0	0	0	0	0	0	0	0	0	0	16	0	0	0	0	0	0
ASV_1418	0	0	0	0	0	0	0	0	0	0	0	0	0	0	0	0	0	0	16	0	0	0	0	0	0
ASV_1419	0	0	0	0	0	0	0	0	0	0	0	0	0	0	0	0	0	0	16	0	0	0	0	0	0
ASV_1420	0	0	0	0	0	0	0	0	0	0	0	0	0	0	0	0	0	0	16	0	0	0	0	0	0
ASV_1421	0	0	0	0	0	0	0	0	0	0	0	0	0	0	0	0	0	0	16	0	0	0	0	0	0
ASV_1422	0	0	0	0	0	0	0	0	0	0	0	0	0	0	0	0	0	0	16	0	0	0	0	0	0
ASV_1423	0	0	0	0	0	0	0	0	0	0	0	0	0	0	0	0	0	0	16	0	0	0	0	0	0
ASV_1424	0	0	0	0	0	0	0	0	0	0	0	0	0	0	0	0	0	0	16	0	0	0	0	0	0
ASV_1425	0	0	0	0	0	0	0	0	0	0	0	0	0	0	0	0	0	0	16	0	0	0	0	0	0
ASV_1426	0	0	0	0	0	0	0	0	0	0	0	0	0	0	0	0	0	0	16	0	0	0	0	0	0
ASV_1427	0	0	0	0	0	0	0	0	0	0	0	0	0	0	0	0	0	0	10	0	0	0	0	6	0
ASV_1428	0	0	0	0	0	0	0	0	0	0	0	0	0	0	0	0	0	0	6	0	0	0	10	0	0
ASV_1429	0	0	0	0	0	0	0	0	0	0	0	0	0	0	0	0	0	0	0	16	0	0	0	0	0
ASV_1430	0	0	0	0	0	0	0	0	0	0	0	0	0	0	0	0	0	0	0	16	0	0	0	0	0
ASV_1431	0	0	0	0	0	0	0	0	0	0	0	0	0	0	0	0	0	0	0	16	0	0	0	0	0
ASV_1432	0	0	0	0	0	0	0	0	0	0	0	0	0	0	0	0	0	0	0	16	0	0	0	0	0
ASV_1433	0	0	0	0	0	0	0	0	0	0	0	0	0	0	0	0	0	0	0	16	0	0	0	0	0
ASV_1434	0	0	0	0	0	0	0	0	0	0	0	0	0	0	0	0	0	0	0	0	16	0	0	0	0
ASV_1435	0	0	0	0	0	0	0	0	0	0	0	0	0	0	0	0	0	0	0	0	16	0	0	0	0
ASV_1436	0	0	0	0	0	0	0	0	0	0	0	0	0	0	0	0	0	0	0	0	16	0	0	0	0
ASV_1437	0	0	0	0	0	0	0	0	0	0	0	0	0	0	0	0	0	0	0	0	16	0	0	0	0
ASV_1438	0	0	0	0	0	0	0	0	0	0	0	0	0	0	0	0	0	0	0	0	16	0	0	0	0
ASV_1439	0	0	0	0	0	0	0	0	0	0	0	0	0	0	0	0	0	0	0	0	16	0	0	0	0
ASV_1440	0	0	0	0	0	0	0	0	0	0	0	0	0	0	0	0	0	0	0	0	0	16	0	0	0
ASV_1441	0	0	0	0	0	0	0	0	0	0	0	0	0	0	0	0	0	0	0	0	0	16	0	0	0
ASV_1442	0	0	0	0	0	0	0	0	0	0	0	0	0	0	0	0	0	0	0	0	0	16	0	0	0
ASV_1443	0	0	0	0	0	0	0	0	0	0	0	0	0	0	0	0	0	0	0	0	0	16	0	0	0
ASV_1444	0	0	0	0	0	0	0	0	0	0	0	0	0	0	0	0	0	0	0	0	0	16	0	0	0
ASV_1445	0	0	0	0	0	0	0	0	0	0	0	0	0	0	0	0	0	0	0	0	0	16	0	0	0
ASV_1446	0	0	0	0	0	0	0	0	0	0	0	0	0	0	0	0	0	0	0	0	0	16	0	0	0
ASV_1447	0	0	0	0	0	0	0	0	0	0	0	0	0	0	0	0	0	0	0	0	0	0	16	0	0
ASV_1448	0	0	0	0	0	0	0	0	0	0	0	0	0	0	0	0	0	0	0	0	0	0	0	16	0
ASV_1449	0	0	0	0	0	0	0	0	0	0	0	0	0	0	0	0	0	0	0	0	0	0	0	16	0
ASV_1450	0	0	0	0	0	0	0	0	0	0	0	0	0	0	0	0	0	0	0	0	0	0	0	16	0
ASV_1451	0	0	0	0	0	0	0	0	0	0	0	0	0	0	0	0	0	0	0	0	0	0	0	16	0
ASV_1452	15	0	0	0	0	0	0	0	0	0	0	0	0	0	0	0	0	0	0	0	0	0	0	0	0
ASV_1453	6	0	4	0	0	0	5	0	0	0	0	0	0	0	0	0	0	0	0	0	0	0	0	0	0
ASV_1454	2	0	2	4	0	0	0	0	2	0	1	1	1	2	0	0	0	0	0	0	0	0	0	0	0
ASV_1455	0	15	0	0	0	0	0	0	0	0	0	0	0	0	0	0	0	0	0	0	0	0	0	0	0
ASV_1456	0	5	0	0	0	0	0	0	0	10	0	0	0	0	0	0	0	0	0	0	0	0	0	0	0
ASV_1457	0	0	3	0	0	1	0	0	1	0	0	0	6	4	0	0	0	0	0	0	0	0	0	0	0
ASV_1458	0	0	2	0	0	0	0	0	0	0	0	0	0	0	0	4	9	0	0	0	0	0	0	0	0
ASV_1459	0	0	0	4	0	0	0	0	0	0	0	0	0	5	6	0	0	0	0	0	0	0	0	0	0
ASV_1460	0	0	0	0	5	5	0	0	0	0	0	0	0	0	0	0	0	0	5	0	0	0	0	0	0
ASV_1461	0	0	0	0	0	0	15	0	0	0	0	0	0	0	0	0	0	0	0	0	0	0	0	0	0
ASV_1462	0	0	0	0	0	0	0	0	6	0	0	0	9	0	0	0	0	0	0	0	0	0	0	0	0
ASV_1463	0	0	0	0	0	0	0	0	0	0	15	0	0	0	0	0	0	0	0	0	0	0	0	0	0
ASV_1464	0	0	0	0	0	0	0	0	0	0	6	0	0	0	0	0	0	9	0	0	0	0	0	0	0
ASV_1465	0	0	0	0	0	0	0	0	0	0	0	8	7	0	0	0	0	0	0	0	0	0	0	0	0
ASV_1466	0	0	0	0	0	0	0	0	0	0	0	0	0	5	10	0	0	0	0	0	0	0	0	0	0
ASV_1467	0	0	0	0	0	0	0	0	0	0	0	0	0	0	0	15	0	0	0	0	0	0	0	0	0
ASV_1468	0	0	0	0	0	0	0	0	0	0	0	0	0	0	0	15	0	0	0	0	0	0	0	0	0
ASV_1469	0	0	0	0	0	0	0	0	0	0	0	0	0	0	0	15	0	0	0	0	0	0	0	0	0
ASV_1470	0	0	0	0	0	0	0	0	0	0	0	0	0	0	0	15	0	0	0	0	0	0	0	0	0
ASV_1471	0	0	0	0	0	0	0	0	0	0	0	0	0	0	0	15	0	0	0	0	0	0	0	0	0
ASV_1472	0	0	0	0	0	0	0	0	0	0	0	0	0	0	0	10	0	5	0	0	0	0	0	0	0
ASV_1473	0	0	0	0	0	0	0	0	0	0	0	0	0	0	0	4	0	0	11	0	0	0	0	0	0
ASV_1474	0	0	0	0	0	0	0	0	0	0	0	0	0	0	0	0	15	0	0	0	0	0	0	0	0
ASV_1475	0	0	0	0	0	0	0	0	0	0	0	0	0	0	0	0	15	0	0	0	0	0	0	0	0
ASV_1476	0	0	0	0	0	0	0	0	0	0	0	0	0	0	0	0	15	0	0	0	0	0	0	0	0
ASV_1477	0	0	0	0	0	0	0	0	0	0	0	0	0	0	0	0	15	0	0	0	0	0	0	0	0
ASV_1478	0	0	0	0	0	0	0	0	0	0	0	0	0	0	0	0	0	15	0	0	0	0	0	0	0
ASV_1479	0	0	0	0	0	0	0	0	0	0	0	0	0	0	0	0	0	15	0	0	0	0	0	0	0
ASV_1480	0	0	0	0	0	0	0	0	0	0	0	0	0	0	0	0	0	0	15	0	0	0	0	0	0
ASV_1481	0	0	0	0	0	0	0	0	0	0	0	0	0	0	0	0	0	0	15	0	0	0	0	0	0
ASV_1482	0	0	0	0	0	0	0	0	0	0	0	0	0	0	0	0	0	0	15	0	0	0	0	0	0
ASV_1483	0	0	0	0	0	0	0	0	0	0	0	0	0	0	0	0	0	0	15	0	0	0	0	0	0
ASV_1484	0	0	0	0	0	0	0	0	0	0	0	0	0	0	0	0	0	0	15	0	0	0	0	0	0
ASV_1485	0	0	0	0	0	0	0	0	0	0	0	0	0	0	0	0	0	0	8	0	0	0	0	7	0
ASV_1486	0	0	0	0	0	0	0	0	0	0	0	0	0	0	0	0	0	0	7	8	0	0	0	0	0
ASV_1487	0	0	0	0	0	0	0	0	0	0	0	0	0	0	0	0	0	0	0	15	0	0	0	0	0
ASV_1488	0	0	0	0	0	0	0	0	0	0	0	0	0	0	0	0	0	0	0	15	0	0	0	0	0
ASV_1489	0	0	0	0	0	0	0	0	0	0	0	0	0	0	0	0	0	0	0	15	0	0	0	0	0
ASV_1490	0	0	0	0	0	0	0	0	0	0	0	0	0	0	0	0	0	0	0	15	0	0	0	0	0
ASV_1491	0	0	0	0	0	0	0	0	0	0	0	0	0	0	0	0	0	0	0	15	0	0	0	0	0
ASV_1492	0	0	0	0	0	0	0	0	0	0	0	0	0	0	0	0	0	0	0	15	0	0	0	0	0
ASV_1493	0	0	0	0	0	0	0	0	0	0	0	0	0	0	0	0	0	0	0	15	0	0	0	0	0
ASV_1494	0	0	0	0	0	0	0	0	0	0	0	0	0	0	0	0	0	0	0	15	0	0	0	0	0
ASV_1495	0	0	0	0	0	0	0	0	0	0	0	0	0	0	0	0	0	0	0	15	0	0	0	0	0
ASV_1496	0	0	0	0	0	0	0	0	0	0	0	0	0	0	0	0	0	0	0	15	0	0	0	0	0
ASV_1497	0	0	0	0	0	0	0	0	0	0	0	0	0	0	0	0	0	0	0	15	0	0	0	0	0
ASV_1498	0	0	0	0	0	0	0	0	0	0	0	0	0	0	0	0	0	0	0	9	6	0	0	0	0
ASV_1499	0	0	0	0	0	0	0	0	0	0	0	0	0	0	0	0	0	0	0	0	15	0	0	0	0
ASV_1500	0	0	0	0	0	0	0	0	0	0	0	0	0	0	0	0	0	0	0	0	15	0	0	0	0
ASV_1501	0	0	0	0	0	0	0	0	0	0	0	0	0	0	0	0	0	0	0	0	15	0	0	0	0
ASV_1502	0	0	0	0	0	0	0	0	0	0	0	0	0	0	0	0	0	0	0	0	0	15	0	0	0
ASV_1503	0	0	0	0	0	0	0	0	0	0	0	0	0	0	0	0	0	0	0	0	0	15	0	0	0
ASV_1504	0	0	0	0	0	0	0	0	0	0	0	0	0	0	0	0	0	0	0	0	0	15	0	0	0
ASV_1505	0	0	0	0	0	0	0	0	0	0	0	0	0	0	0	0	0	0	0	0	0	15	0	0	0
ASV_1506	0	0	0	0	0	0	0	0	0	0	0	0	0	0	0	0	0	0	0	0	0	15	0	0	0
ASV_1507	0	0	0	0	0	0	0	0	0	0	0	0	0	0	0	0	0	0	0	0	0	15	0	0	0
ASV_1508	0	0	0	0	0	0	0	0	0	0	0	0	0	0	0	0	0	0	0	0	0	15	0	0	0
ASV_1509	0	0	0	0	0	0	0	0	0	0	0	0	0	0	0	0	0	0	0	0	0	0	0	15	0
ASV_1510	0	0	0	0	0	0	0	0	0	0	0	0	0	0	0	0	0	0	0	0	0	0	0	15	0
ASV_1511	0	0	0	0	0	0	0	0	0	0	0	0	0	0	0	0	0	0	0	0	0	0	0	15	0
ASV_1512	0	0	0	0	0	0	0	0	0	0	0	0	0	0	0	0	0	0	0	0	0	0	0	15	0
ASV_1513	0	0	0	0	0	0	0	0	0	0	0	0	0	0	0	0	0	0	0	0	0	0	0	15	0
ASV_1514	0	0	0	0	0	0	0	0	0	0	0	0	0	0	0	0	0	0	0	0	0	0	0	15	0
ASV_1515	0	0	0	0	0	0	0	0	0	0	0	0	0	0	0	0	0	0	0	0	0	0	0	15	0
ASV_1516	0	0	0	0	0	0	0	0	0	0	0	0	0	0	0	0	0	0	0	0	0	0	0	15	0
ASV_1517	0	0	0	0	0	0	0	0	0	0	0	0	0	0	0	0	0	0	0	0	0	0	0	15	0
ASV_1518	0	0	0	0	0	0	0	0	0	0	0	0	0	0	0	0	0	0	0	0	0	0	0	15	0
ASV_1519	0	0	0	0	0	0	0	0	0	0	0	0	0	0	0	0	0	0	0	0	0	0	0	15	0
ASV_1520	0	0	0	0	0	0	0	0	0	0	0	0	0	0	0	0	0	0	0	0	0	0	0	0	15
ASV_1521	0	0	0	0	0	0	0	0	0	0	0	0	0	0	0	0	0	0	0	0	0	0	0	0	15
ASV_1522	0	0	0	0	0	0	0	0	0	0	0	0	0	0	0	0	0	0	0	0	0	0	0	0	15
ASV_1523	0	0	0	0	0	0	0	0	0	0	0	0	0	0	0	0	0	0	0	0	0	0	0	0	15
ASV_1524	0	0	0	0	0	0	0	0	0	0	0	0	0	0	0	0	0	0	0	0	0	0	0	0	15
ASV_1525	0	0	0	0	0	0	0	0	0	0	0	0	0	0	0	0	0	0	0	0	0	0	0	0	15
ASV_1526	6	0	8	0	0	0	0	0	0	0	0	0	0	0	0	0	0	0	0	0	0	0	0	0	0
ASV_1527	4	0	0	0	0	0	1	0	0	0	1	1	1	1	5	0	0	0	0	0	0	0	0	0	0
ASV_1528	4	3	0	0	0	0	0	4	0	0	0	0	2	0	1	0	0	0	0	0	0	0	0	0	0
ASV_1529	3	0	0	0	0	0	0	0	0	0	0	0	1	0	1	0	0	0	0	9	0	0	0	0	0
ASV_1530	0	0	14	0	0	0	0	0	0	0	0	0	0	0	0	0	0	0	0	0	0	0	0	0	0
ASV_1531	0	0	7	0	0	0	2	0	0	0	0	5	0	0	0	0	0	0	0	0	0	0	0	0	0
ASV_1532	0	0	5	0	0	0	0	0	0	0	0	0	3	0	3	0	0	3	0	0	0	0	0	0	0
ASV_1533	0	0	4	0	0	0	0	2	0	3	0	5	0	0	0	0	0	0	0	0	0	0	0	0	0
ASV_1534	0	0	1	0	0	2	0	0	5	0	0	0	0	1	0	0	0	0	0	5	0	0	0	0	0
ASV_1535	0	0	0	3	1	0	0	0	2	0	1	2	0	5	0	0	0	0	0	0	0	0	0	0	0
ASV_1536	0	0	0	0	9	0	0	0	0	0	5	0	0	0	0	0	0	0	0	0	0	0	0	0	0
ASV_1537	0	0	0	0	4	7	0	0	0	0	0	0	3	0	0	0	0	0	0	0	0	0	0	0	0
ASV_1538	0	0	0	0	0	0	14	0	0	0	0	0	0	0	0	0	0	0	0	0	0	0	0	0	0
ASV_1539	0	0	0	0	0	0	14	0	0	0	0	0	0	0	0	0	0	0	0	0	0	0	0	0	0
ASV_1540	0	0	0	0	0	0	6	0	0	0	0	0	0	0	0	8	0	0	0	0	0	0	0	0	0
ASV_1541	0	0	0	0	0	0	0	14	0	0	0	0	0	0	0	0	0	0	0	0	0	0	0	0	0
ASV_1542	0	0	0	0	0	0	0	8	0	0	0	0	0	0	0	0	0	0	0	6	0	0	0	0	0
ASV_1543	0	0	0	0	0	0	0	7	7	0	0	0	0	0	0	0	0	0	0	0	0	0	0	0	0
ASV_1544	0	0	0	0	0	0	0	0	12	0	0	0	0	0	0	2	0	0	0	0	0	0	0	0	0
ASV_1545	0	0	0	0	0	0	0	0	0	14	0	0	0	0	0	0	0	0	0	0	0	0	0	0	0
ASV_1546	0	0	0	0	0	0	0	0	0	0	0	0	14	0	0	0	0	0	0	0	0	0	0	0	0
ASV_1547	0	0	0	0	0	0	0	0	0	0	0	0	14	0	0	0	0	0	0	0	0	0	0	0	0
ASV_1548	0	0	0	0	0	0	0	0	0	0	0	0	0	2	0	0	12	0	0	0	0	0	0	0	0
ASV_1549	0	0	0	0	0	0	0	0	0	0	0	0	0	0	14	0	0	0	0	0	0	0	0	0	0
ASV_1550	0	0	0	0	0	0	0	0	0	0	0	0	0	0	14	0	0	0	0	0	0	0	0	0	0
ASV_1551	0	0	0	0	0	0	0	0	0	0	0	0	0	0	8	0	0	0	0	0	0	3	0	0	3
ASV_1552	0	0	0	0	0	0	0	0	0	0	0	0	0	0	0	14	0	0	0	0	0	0	0	0	0
ASV_1553	0	0	0	0	0	0	0	0	0	0	0	0	0	0	0	14	0	0	0	0	0	0	0	0	0
ASV_1554	0	0	0	0	0	0	0	0	0	0	0	0	0	0	0	14	0	0	0	0	0	0	0	0	0
ASV_1555	0	0	0	0	0	0	0	0	0	0	0	0	0	0	0	14	0	0	0	0	0	0	0	0	0
ASV_1556	0	0	0	0	0	0	0	0	0	0	0	0	0	0	0	14	0	0	0	0	0	0	0	0	0
ASV_1557	0	0	0	0	0	0	0	0	0	0	0	0	0	0	0	10	4	0	0	0	0	0	0	0	0
ASV_1558	0	0	0	0	0	0	0	0	0	0	0	0	0	0	0	8	0	0	6	0	0	0	0	0	0
ASV_1559	0	0	0	0	0	0	0	0	0	0	0	0	0	0	0	0	14	0	0	0	0	0	0	0	0
ASV_1560	0	0	0	0	0	0	0	0	0	0	0	0	0	0	0	0	14	0	0	0	0	0	0	0	0
ASV_1561	0	0	0	0	0	0	0	0	0	0	0	0	0	0	0	0	14	0	0	0	0	0	0	0	0
ASV_1562	0	0	0	0	0	0	0	0	0	0	0	0	0	0	0	0	14	0	0	0	0	0	0	0	0
ASV_1563	0	0	0	0	0	0	0	0	0	0	0	0	0	0	0	0	6	0	0	0	8	0	0	0	0
ASV_1564	0	0	0	0	0	0	0	0	0	0	0	0	0	0	0	0	0	14	0	0	0	0	0	0	0
ASV_1565	0	0	0	0	0	0	0	0	0	0	0	0	0	0	0	0	0	14	0	0	0	0	0	0	0
ASV_1566	0	0	0	0	0	0	0	0	0	0	0	0	0	0	0	0	0	7	0	7	0	0	0	0	0
ASV_1567	0	0	0	0	0	0	0	0	0	0	0	0	0	0	0	0	0	3	0	0	0	0	0	11	0
ASV_1568	0	0	0	0	0	0	0	0	0	0	0	0	0	0	0	0	0	3	0	11	0	0	0	0	0
ASV_1569	0	0	0	0	0	0	0	0	0	0	0	0	0	0	0	0	0	0	14	0	0	0	0	0	0
ASV_1570	0	0	0	0	0	0	0	0	0	0	0	0	0	0	0	0	0	0	14	0	0	0	0	0	0
ASV_1571	0	0	0	0	0	0	0	0	0	0	0	0	0	0	0	0	0	0	14	0	0	0	0	0	0
ASV_1572	0	0	0	0	0	0	0	0	0	0	0	0	0	0	0	0	0	0	14	0	0	0	0	0	0
ASV_1573	0	0	0	0	0	0	0	0	0	0	0	0	0	0	0	0	0	0	14	0	0	0	0	0	0
ASV_1574	0	0	0	0	0	0	0	0	0	0	0	0	0	0	0	0	0	0	14	0	0	0	0	0	0
ASV_1575	0	0	0	0	0	0	0	0	0	0	0	0	0	0	0	0	0	0	14	0	0	0	0	0	0
ASV_1576	0	0	0	0	0	0	0	0	0	0	0	0	0	0	0	0	0	0	14	0	0	0	0	0	0
ASV_1577	0	0	0	0	0	0	0	0	0	0	0	0	0	0	0	0	0	0	14	0	0	0	0	0	0
ASV_1578	0	0	0	0	0	0	0	0	0	0	0	0	0	0	0	0	0	0	10	4	0	0	0	0	0
ASV_1579	0	0	0	0	0	0	0	0	0	0	0	0	0	0	0	0	0	0	0	14	0	0	0	0	0
ASV_1580	0	0	0	0	0	0	0	0	0	0	0	0	0	0	0	0	0	0	0	14	0	0	0	0	0
ASV_1581	0	0	0	0	0	0	0	0	0	0	0	0	0	0	0	0	0	0	0	14	0	0	0	0	0
ASV_1582	0	0	0	0	0	0	0	0	0	0	0	0	0	0	0	0	0	0	0	14	0	0	0	0	0
ASV_1583	0	0	0	0	0	0	0	0	0	0	0	0	0	0	0	0	0	0	0	14	0	0	0	0	0
ASV_1584	0	0	0	0	0	0	0	0	0	0	0	0	0	0	0	0	0	0	0	14	0	0	0	0	0
ASV_1585	0	0	0	0	0	0	0	0	0	0	0	0	0	0	0	0	0	0	0	14	0	0	0	0	0
ASV_1586	0	0	0	0	0	0	0	0	0	0	0	0	0	0	0	0	0	0	0	14	0	0	0	0	0
ASV_1587	0	0	0	0	0	0	0	0	0	0	0	0	0	0	0	0	0	0	0	14	0	0	0	0	0
ASV_1588	0	0	0	0	0	0	0	0	0	0	0	0	0	0	0	0	0	0	0	0	14	0	0	0	0
ASV_1589	0	0	0	0	0	0	0	0	0	0	0	0	0	0	0	0	0	0	0	0	14	0	0	0	0
ASV_1590	0	0	0	0	0	0	0	0	0	0	0	0	0	0	0	0	0	0	0	0	14	0	0	0	0
ASV_1591	0	0	0	0	0	0	0	0	0	0	0	0	0	0	0	0	0	0	0	0	14	0	0	0	0
ASV_1592	0	0	0	0	0	0	0	0	0	0	0	0	0	0	0	0	0	0	0	0	14	0	0	0	0
ASV_1593	0	0	0	0	0	0	0	0	0	0	0	0	0	0	0	0	0	0	0	0	14	0	0	0	0
ASV_1594	0	0	0	0	0	0	0	0	0	0	0	0	0	0	0	0	0	0	0	0	14	0	0	0	0
ASV_1595	0	0	0	0	0	0	0	0	0	0	0	0	0	0	0	0	0	0	0	0	14	0	0	0	0
ASV_1596	0	0	0	0	0	0	0	0	0	0	0	0	0	0	0	0	0	0	0	0	14	0	0	0	0
ASV_1597	0	0	0	0	0	0	0	0	0	0	0	0	0	0	0	0	0	0	0	0	14	0	0	0	0
ASV_1598	0	0	0	0	0	0	0	0	0	0	0	0	0	0	0	0	0	0	0	0	14	0	0	0	0
ASV_1599	0	0	0	0	0	0	0	0	0	0	0	0	0	0	0	0	0	0	0	0	0	14	0	0	0
ASV_1600	0	0	0	0	0	0	0	0	0	0	0	0	0	0	0	0	0	0	0	0	0	14	0	0	0
ASV_1601	0	0	0	0	0	0	0	0	0	0	0	0	0	0	0	0	0	0	0	0	0	14	0	0	0
ASV_1602	0	0	0	0	0	0	0	0	0	0	0	0	0	0	0	0	0	0	0	0	0	14	0	0	0
ASV_1603	0	0	0	0	0	0	0	0	0	0	0	0	0	0	0	0	0	0	0	0	0	14	0	0	0
ASV_1604	0	0	0	0	0	0	0	0	0	0	0	0	0	0	0	0	0	0	0	0	0	14	0	0	0
ASV_1605	0	0	0	0	0	0	0	0	0	0	0	0	0	0	0	0	0	0	0	0	0	14	0	0	0
ASV_1606	0	0	0	0	0	0	0	0	0	0	0	0	0	0	0	0	0	0	0	0	0	14	0	0	0
ASV_1607	0	0	0	0	0	0	0	0	0	0	0	0	0	0	0	0	0	0	0	0	0	14	0	0	0
ASV_1608	0	0	0	0	0	0	0	0	0	0	0	0	0	0	0	0	0	0	0	0	0	0	14	0	0
ASV_1609	0	0	0	0	0	0	0	0	0	0	0	0	0	0	0	0	0	0	0	0	0	0	0	14	0
ASV_1610	0	0	0	0	0	0	0	0	0	0	0	0	0	0	0	0	0	0	0	0	0	0	0	14	0
ASV_1611	0	0	0	0	0	0	0	0	0	0	0	0	0	0	0	0	0	0	0	0	0	0	0	0	14
ASV_1612	0	0	0	0	0	0	0	0	0	0	0	0	0	0	0	0	0	0	0	0	0	0	0	0	14
ASV_1613	0	0	0	0	0	0	0	0	0	0	0	0	0	0	0	0	0	0	0	0	0	0	0	0	14
ASV_1614	13	0	0	0	0	0	0	0	0	0	0	0	0	0	0	0	0	0	0	0	0	0	0	0	0
ASV_1615	8	5	0	0	0	0	0	0	0	0	0	0	0	0	0	0	0	0	0	0	0	0	0	0	0
ASV_1616	3	0	0	4	0	0	1	0	0	3	0	1	0	0	1	0	0	0	0	0	0	0	0	0	0
ASV_1617	3	0	0	0	0	0	3	0	0	0	0	5	0	0	2	0	0	0	0	0	0	0	0	0	0
ASV_1618	1	4	0	0	0	0	0	3	0	0	1	0	0	4	0	0	0	0	0	0	0	0	0	0	0
ASV_1619	0	6	0	0	7	0	0	0	0	0	0	0	0	0	0	0	0	0	0	0	0	0	0	0	0
ASV_1620	0	4	4	0	0	0	1	2	0	0	1	1	0	0	0	0	0	0	0	0	0	0	0	0	0
ASV_1621	0	2	4	0	0	0	1	4	0	0	0	1	0	0	0	0	0	0	1	0	0	0	0	0	0
ASV_1622	0	0	13	0	0	0	0	0	0	0	0	0	0	0	0	0	0	0	0	0	0	0	0	0	0
ASV_1623	0	0	5	0	0	0	0	0	0	5	1	0	1	0	1	0	0	0	0	0	0	0	0	0	0
ASV_1624	0	0	5	0	0	0	0	0	0	0	0	0	0	0	0	0	0	0	0	8	0	0	0	0	0
ASV_1625	0	0	0	13	0	0	0	0	0	0	0	0	0	0	0	0	0	0	0	0	0	0	0	0	0
ASV_1626	0	0	0	13	0	0	0	0	0	0	0	0	0	0	0	0	0	0	0	0	0	0	0	0	0
ASV_1627	0	0	0	13	0	0	0	0	0	0	0	0	0	0	0	0	0	0	0	0	0	0	0	0	0
ASV_1628	0	0	0	7	0	0	6	0	0	0	0	0	0	0	0	0	0	0	0	0	0	0	0	0	0
ASV_1629	0	0	0	4	5	0	4	0	0	0	0	0	0	0	0	0	0	0	0	0	0	0	0	0	0
ASV_1630	0	0	0	1	0	0	0	0	0	0	1	3	0	8	0	0	0	0	0	0	0	0	0	0	0
ASV_1631	0	0	0	0	13	0	0	0	0	0	0	0	0	0	0	0	0	0	0	0	0	0	0	0	0
ASV_1632	0	0	0	0	4	0	0	0	0	0	0	0	0	0	0	0	0	0	0	9	0	0	0	0	0
ASV_1633	0	0	0	0	0	0	13	0	0	0	0	0	0	0	0	0	0	0	0	0	0	0	0	0	0
ASV_1634	0	0	0	0	0	0	13	0	0	0	0	0	0	0	0	0	0	0	0	0	0	0	0	0	0
ASV_1635	0	0	0	0	0	0	6	0	0	0	0	7	0	0	0	0	0	0	0	0	0	0	0	0	0
ASV_1636	0	0	0	0	0	0	3	0	0	0	0	0	0	0	0	0	0	0	0	10	0	0	0	0	0
ASV_1637	0	0	0	0	0	0	3	10	0	0	0	0	0	0	0	0	0	0	0	0	0	0	0	0	0
ASV_1638	0	0	0	0	0	0	1	3	0	0	0	4	1	1	2	1	0	0	0	0	0	0	0	0	0
ASV_1639	0	0	0	0	0	0	0	0	0	13	0	0	0	0	0	0	0	0	0	0	0	0	0	0	0
ASV_1640	0	0	0	0	0	0	0	0	0	13	0	0	0	0	0	0	0	0	0	0	0	0	0	0	0
ASV_1641	0	0	0	0	0	0	0	0	0	0	6	4	0	0	3	0	0	0	0	0	0	0	0	0	0
ASV_1642	0	0	0	0	0	0	0	0	0	0	5	0	8	0	0	0	0	0	0	0	0	0	0	0	0
ASV_1643	0	0	0	0	0	0	0	0	0	0	4	0	0	0	0	9	0	0	0	0	0	0	0	0	0
ASV_1644	0	0	0	0	0	0	0	0	0	0	0	0	13	0	0	0	0	0	0	0	0	0	0	0	0
ASV_1645	0	0	0	0	0	0	0	0	0	0	0	0	0	13	0	0	0	0	0	0	0	0	0	0	0
ASV_1646	0	0	0	0	0	0	0	0	0	0	0	0	0	13	0	0	0	0	0	0	0	0	0	0	0
ASV_1647	0	0	0	0	0	0	0	0	0	0	0	0	0	0	13	0	0	0	0	0	0	0	0	0	0
ASV_1648	0	0	0	0	0	0	0	0	0	0	0	0	0	0	13	0	0	0	0	0	0	0	0	0	0
ASV_1649	0	0	0	0	0	0	0	0	0	0	0	0	0	0	13	0	0	0	0	0	0	0	0	0	0
ASV_1650	0	0	0	0	0	0	0	0	0	0	0	0	0	0	0	13	0	0	0	0	0	0	0	0	0
ASV_1651	0	0	0	0	0	0	0	0	0	0	0	0	0	0	0	13	0	0	0	0	0	0	0	0	0
ASV_1652	0	0	0	0	0	0	0	0	0	0	0	0	0	0	0	13	0	0	0	0	0	0	0	0	0
ASV_1653	0	0	0	0	0	0	0	0	0	0	0	0	0	0	0	13	0	0	0	0	0	0	0	0	0
ASV_1654	0	0	0	0	0	0	0	0	0	0	0	0	0	0	0	13	0	0	0	0	0	0	0	0	0
ASV_1655	0	0	0	0	0	0	0	0	0	0	0	0	0	0	0	13	0	0	0	0	0	0	0	0	0
ASV_1656	0	0	0	0	0	0	0	0	0	0	0	0	0	0	0	13	0	0	0	0	0	0	0	0	0
ASV_1657	0	0	0	0	0	0	0	0	0	0	0	0	0	0	0	13	0	0	0	0	0	0	0	0	0
ASV_1658	0	0	0	0	0	0	0	0	0	0	0	0	0	0	0	13	0	0	0	0	0	0	0	0	0
ASV_1659	0	0	0	0	0	0	0	0	0	0	0	0	0	0	0	13	0	0	0	0	0	0	0	0	0
ASV_1660	0	0	0	0	0	0	0	0	0	0	0	0	0	0	0	13	0	0	0	0	0	0	0	0	0
ASV_1661	0	0	0	0	0	0	0	0	0	0	0	0	0	0	0	13	0	0	0	0	0	0	0	0	0
ASV_1662	0	0	0	0	0	0	0	0	0	0	0	0	0	0	0	13	0	0	0	0	0	0	0	0	0
ASV_1663	0	0	0	0	0	0	0	0	0	0	0	0	0	0	0	8	0	5	0	0	0	0	0	0	0
ASV_1664	0	0	0	0	0	0	0	0	0	0	0	0	0	0	0	0	13	0	0	0	0	0	0	0	0
ASV_1665	0	0	0	0	0	0	0	0	0	0	0	0	0	0	0	0	13	0	0	0	0	0	0	0	0
ASV_1666	0	0	0	0	0	0	0	0	0	0	0	0	0	0	0	0	13	0	0	0	0	0	0	0	0
ASV_1667	0	0	0	0	0	0	0	0	0	0	0	0	0	0	0	0	13	0	0	0	0	0	0	0	0
ASV_1668	0	0	0	0	0	0	0	0	0	0	0	0	0	0	0	0	13	0	0	0	0	0	0	0	0
ASV_1669	0	0	0	0	0	0	0	0	0	0	0	0	0	0	0	0	13	0	0	0	0	0	0	0	0
ASV_1670	0	0	0	0	0	0	0	0	0	0	0	0	0	0	0	0	13	0	0	0	0	0	0	0	0
ASV_1671	0	0	0	0	0	0	0	0	0	0	0	0	0	0	0	0	13	0	0	0	0	0	0	0	0
ASV_1672	0	0	0	0	0	0	0	0	0	0	0	0	0	0	0	0	13	0	0	0	0	0	0	0	0
ASV_1673	0	0	0	0	0	0	0	0	0	0	0	0	0	0	0	0	0	13	0	0	0	0	0	0	0
ASV_1674	0	0	0	0	0	0	0	0	0	0	0	0	0	0	0	0	0	13	0	0	0	0	0	0	0
ASV_1675	0	0	0	0	0	0	0	0	0	0	0	0	0	0	0	0	0	13	0	0	0	0	0	0	0
ASV_1676	0	0	0	0	0	0	0	0	0	0	0	0	0	0	0	0	0	13	0	0	0	0	0	0	0
ASV_1677	0	0	0	0	0	0	0	0	0	0	0	0	0	0	0	0	0	13	0	0	0	0	0	0	0
ASV_1678	0	0	0	0	0	0	0	0	0	0	0	0	0	0	0	0	0	13	0	0	0	0	0	0	0
ASV_1679	0	0	0	0	0	0	0	0	0	0	0	0	0	0	0	0	0	13	0	0	0	0	0	0	0
ASV_1680	0	0	0	0	0	0	0	0	0	0	0	0	0	0	0	0	0	0	13	0	0	0	0	0	0
ASV_1681	0	0	0	0	0	0	0	0	0	0	0	0	0	0	0	0	0	0	13	0	0	0	0	0	0
ASV_1682	0	0	0	0	0	0	0	0	0	0	0	0	0	0	0	0	0	0	13	0	0	0	0	0	0
ASV_1683	0	0	0	0	0	0	0	0	0	0	0	0	0	0	0	0	0	0	13	0	0	0	0	0	0
ASV_1684	0	0	0	0	0	0	0	0	0	0	0	0	0	0	0	0	0	0	13	0	0	0	0	0	0
ASV_1685	0	0	0	0	0	0	0	0	0	0	0	0	0	0	0	0	0	0	13	0	0	0	0	0	0
ASV_1686	0	0	0	0	0	0	0	0	0	0	0	0	0	0	0	0	0	0	13	0	0	0	0	0	0
ASV_1687	0	0	0	0	0	0	0	0	0	0	0	0	0	0	0	0	0	0	13	0	0	0	0	0	0
ASV_1688	0	0	0	0	0	0	0	0	0	0	0	0	0	0	0	0	0	0	13	0	0	0	0	0	0
ASV_1689	0	0	0	0	0	0	0	0	0	0	0	0	0	0	0	0	0	0	13	0	0	0	0	0	0
ASV_1690	0	0	0	0	0	0	0	0	0	0	0	0	0	0	0	0	0	0	13	0	0	0	0	0	0
ASV_1691	0	0	0	0	0	0	0	0	0	0	0	0	0	0	0	0	0	0	13	0	0	0	0	0	0
ASV_1692	0	0	0	0	0	0	0	0	0	0	0	0	0	0	0	0	0	0	13	0	0	0	0	0	0
ASV_1693	0	0	0	0	0	0	0	0	0	0	0	0	0	0	0	0	0	0	13	0	0	0	0	0	0
ASV_1694	0	0	0	0	0	0	0	0	0	0	0	0	0	0	0	0	0	0	13	0	0	0	0	0	0
ASV_1695	0	0	0	0	0	0	0	0	0	0	0	0	0	0	0	0	0	0	9	4	0	0	0	0	0
ASV_1696	0	0	0	0	0	0	0	0	0	0	0	0	0	0	0	0	0	0	0	13	0	0	0	0	0
ASV_1697	0	0	0	0	0	0	0	0	0	0	0	0	0	0	0	0	0	0	0	13	0	0	0	0	0
ASV_1698	0	0	0	0	0	0	0	0	0	0	0	0	0	0	0	0	0	0	0	13	0	0	0	0	0
ASV_1699	0	0	0	0	0	0	0	0	0	0	0	0	0	0	0	0	0	0	0	13	0	0	0	0	0
ASV_1700	0	0	0	0	0	0	0	0	0	0	0	0	0	0	0	0	0	0	0	13	0	0	0	0	0
ASV_1701	0	0	0	0	0	0	0	0	0	0	0	0	0	0	0	0	0	0	0	13	0	0	0	0	0
ASV_1702	0	0	0	0	0	0	0	0	0	0	0	0	0	0	0	0	0	0	0	13	0	0	0	0	0
ASV_1703	0	0	0	0	0	0	0	0	0	0	0	0	0	0	0	0	0	0	0	13	0	0	0	0	0
ASV_1704	0	0	0	0	0	0	0	0	0	0	0	0	0	0	0	0	0	0	0	13	0	0	0	0	0
ASV_1705	0	0	0	0	0	0	0	0	0	0	0	0	0	0	0	0	0	0	0	13	0	0	0	0	0
ASV_1706	0	0	0	0	0	0	0	0	0	0	0	0	0	0	0	0	0	0	0	13	0	0	0	0	0
ASV_1707	0	0	0	0	0	0	0	0	0	0	0	0	0	0	0	0	0	0	0	13	0	0	0	0	0
ASV_1708	0	0	0	0	0	0	0	0	0	0	0	0	0	0	0	0	0	0	0	13	0	0	0	0	0
ASV_1709	0	0	0	0	0	0	0	0	0	0	0	0	0	0	0	0	0	0	0	0	13	0	0	0	0
ASV_1710	0	0	0	0	0	0	0	0	0	0	0	0	0	0	0	0	0	0	0	0	13	0	0	0	0
ASV_1711	0	0	0	0	0	0	0	0	0	0	0	0	0	0	0	0	0	0	0	0	13	0	0	0	0
ASV_1712	0	0	0	0	0	0	0	0	0	0	0	0	0	0	0	0	0	0	0	0	13	0	0	0	0
ASV_1713	0	0	0	0	0	0	0	0	0	0	0	0	0	0	0	0	0	0	0	0	13	0	0	0	0
ASV_1714	0	0	0	0	0	0	0	0	0	0	0	0	0	0	0	0	0	0	0	0	13	0	0	0	0
ASV_1715	0	0	0	0	0	0	0	0	0	0	0	0	0	0	0	0	0	0	0	0	13	0	0	0	0
ASV_1716	0	0	0	0	0	0	0	0	0	0	0	0	0	0	0	0	0	0	0	0	13	0	0	0	0
ASV_1717	0	0	0	0	0	0	0	0	0	0	0	0	0	0	0	0	0	0	0	0	0	13	0	0	0
ASV_1718	0	0	0	0	0	0	0	0	0	0	0	0	0	0	0	0	0	0	0	0	0	13	0	0	0
ASV_1719	0	0	0	0	0	0	0	0	0	0	0	0	0	0	0	0	0	0	0	0	0	13	0	0	0
ASV_1720	0	0	0	0	0	0	0	0	0	0	0	0	0	0	0	0	0	0	0	0	0	13	0	0	0
ASV_1721	0	0	0	0	0	0	0	0	0	0	0	0	0	0	0	0	0	0	0	0	0	13	0	0	0
ASV_1722	0	0	0	0	0	0	0	0	0	0	0	0	0	0	0	0	0	0	0	0	0	13	0	0	0
ASV_1723	0	0	0	0	0	0	0	0	0	0	0	0	0	0	0	0	0	0	0	0	0	13	0	0	0
ASV_1724	0	0	0	0	0	0	0	0	0	0	0	0	0	0	0	0	0	0	0	0	0	13	0	0	0
ASV_1725	0	0	0	0	0	0	0	0	0	0	0	0	0	0	0	0	0	0	0	0	0	13	0	0	0
ASV_1726	0	0	0	0	0	0	0	0	0	0	0	0	0	0	0	0	0	0	0	0	0	13	0	0	0
ASV_1727	0	0	0	0	0	0	0	0	0	0	0	0	0	0	0	0	0	0	0	0	0	13	0	0	0
ASV_1728	0	0	0	0	0	0	0	0	0	0	0	0	0	0	0	0	0	0	0	0	0	13	0	0	0
ASV_1729	0	0	0	0	0	0	0	0	0	0	0	0	0	0	0	0	0	0	0	0	0	13	0	0	0
ASV_1730	0	0	0	0	0	0	0	0	0	0	0	0	0	0	0	0	0	0	0	0	0	13	0	0	0
ASV_1731	0	0	0	0	0	0	0	0	0	0	0	0	0	0	0	0	0	0	0	0	0	13	0	0	0
ASV_1732	0	0	0	0	0	0	0	0	0	0	0	0	0	0	0	0	0	0	0	0	0	0	13	0	0
ASV_1733	0	0	0	0	0	0	0	0	0	0	0	0	0	0	0	0	0	0	0	0	0	0	0	13	0
ASV_1734	0	0	0	0	0	0	0	0	0	0	0	0	0	0	0	0	0	0	0	0	0	0	0	13	0
ASV_1735	0	0	0	0	0	0	0	0	0	0	0	0	0	0	0	0	0	0	0	0	0	0	0	13	0
ASV_1736	0	0	0	0	0	0	0	0	0	0	0	0	0	0	0	0	0	0	0	0	0	0	0	13	0
ASV_1737	0	0	0	0	0	0	0	0	0	0	0	0	0	0	0	0	0	0	0	0	0	0	0	13	0
ASV_1738	0	0	0	0	0	0	0	0	0	0	0	0	0	0	0	0	0	0	0	0	0	0	0	13	0
ASV_1739	0	0	0	0	0	0	0	0	0	0	0	0	0	0	0	0	0	0	0	0	0	0	0	13	0
ASV_1740	0	0	0	0	0	0	0	0	0	0	0	0	0	0	0	0	0	0	0	0	0	0	0	0	13
ASV_1741	0	0	0	0	0	0	0	0	0	0	0	0	0	0	0	0	0	0	0	0	0	0	0	0	13
ASV_1742	12	0	0	0	0	0	0	0	0	0	0	0	0	0	0	0	0	0	0	0	0	0	0	0	0
ASV_1743	4	0	0	0	0	4	2	0	2	0	0	0	0	0	0	0	0	0	0	0	0	0	0	0	0
ASV_1744	3	0	0	2	3	0	1	0	0	0	0	0	3	0	0	0	0	0	0	0	0	0	0	0	0
ASV_1745	2	0	0	0	0	6	1	0	2	0	0	0	0	0	0	0	0	0	0	0	0	0	1	0	0
ASV_1746	0	12	0	0	0	0	0	0	0	0	0	0	0	0	0	0	0	0	0	0	0	0	0	0	0
ASV_1747	0	12	0	0	0	0	0	0	0	0	0	0	0	0	0	0	0	0	0	0	0	0	0	0	0
ASV_1748	0	9	0	3	0	0	0	0	0	0	0	0	0	0	0	0	0	0	0	0	0	0	0	0	0
ASV_1749	0	6	0	0	0	0	0	0	0	6	0	0	0	0	0	0	0	0	0	0	0	0	0	0	0
ASV_1750	0	2	0	0	4	0	0	2	1	0	3	0	0	0	0	0	0	0	0	0	0	0	0	0	0
ASV_1751	0	0	7	4	1	0	0	0	0	0	0	0	0	0	0	0	0	0	0	0	0	0	0	0	0
ASV_1752	0	0	4	0	0	0	0	7	0	0	0	0	0	1	0	0	0	0	0	0	0	0	0	0	0
ASV_1753	0	0	0	12	0	0	0	0	0	0	0	0	0	0	0	0	0	0	0	0	0	0	0	0	0
ASV_1754	0	0	0	12	0	0	0	0	0	0	0	0	0	0	0	0	0	0	0	0	0	0	0	0	0
ASV_1755	0	0	0	12	0	0	0	0	0	0	0	0	0	0	0	0	0	0	0	0	0	0	0	0	0
ASV_1756	0	0	0	12	0	0	0	0	0	0	0	0	0	0	0	0	0	0	0	0	0	0	0	0	0
ASV_1757	0	0	0	1	0	1	0	0	0	0	0	0	8	0	2	0	0	0	0	0	0	0	0	0	0
ASV_1758	0	0	0	0	12	0	0	0	0	0	0	0	0	0	0	0	0	0	0	0	0	0	0	0	0
ASV_1759	0	0	0	0	12	0	0	0	0	0	0	0	0	0	0	0	0	0	0	0	0	0	0	0	0
ASV_1760	0	0	0	0	0	0	12	0	0	0	0	0	0	0	0	0	0	0	0	0	0	0	0	0	0
ASV_1761	0	0	0	0	0	0	6	0	0	0	0	0	0	0	0	0	0	0	6	0	0	0	0	0	0
ASV_1762	0	0	0	0	0	0	4	0	0	0	0	1	0	3	4	0	0	0	0	0	0	0	0	0	0
ASV_1763	0	0	0	0	0	0	0	0	12	0	0	0	0	0	0	0	0	0	0	0	0	0	0	0	0
ASV_1764	0	0	0	0	0	0	0	0	6	2	0	2	0	1	1	0	0	0	0	0	0	0	0	0	0
ASV_1765	0	0	0	0	0	0	0	0	0	12	0	0	0	0	0	0	0	0	0	0	0	0	0	0	0
ASV_1766	0	0	0	0	0	0	0	0	0	8	0	0	0	0	0	0	0	0	0	4	0	0	0	0	0
ASV_1767	0	0	0	0	0	0	0	0	0	0	0	12	0	0	0	0	0	0	0	0	0	0	0	0	0
ASV_1768	0	0	0	0	0	0	0	0	0	0	0	4	0	0	8	0	0	0	0	0	0	0	0	0	0
ASV_1769	0	0	0	0	0	0	0	0	0	0	0	4	3	0	0	0	5	0	0	0	0	0	0	0	0
ASV_1770	0	0	0	0	0	0	0	0	0	0	0	4	0	0	0	0	0	0	0	8	0	0	0	0	0
ASV_1771	0	0	0	0	0	0	0	0	0	0	0	0	12	0	0	0	0	0	0	0	0	0	0	0	0
ASV_1772	0	0	0	0	0	0	0	0	0	0	0	0	0	12	0	0	0	0	0	0	0	0	0	0	0
ASV_1773	0	0	0	0	0	0	0	0	0	0	0	0	0	0	12	0	0	0	0	0	0	0	0	0	0
ASV_1774	0	0	0	0	0	0	0	0	0	0	0	0	0	0	0	12	0	0	0	0	0	0	0	0	0
ASV_1775	0	0	0	0	0	0	0	0	0	0	0	0	0	0	0	12	0	0	0	0	0	0	0	0	0
ASV_1776	0	0	0	0	0	0	0	0	0	0	0	0	0	0	0	12	0	0	0	0	0	0	0	0	0
ASV_1777	0	0	0	0	0	0	0	0	0	0	0	0	0	0	0	12	0	0	0	0	0	0	0	0	0
ASV_1778	0	0	0	0	0	0	0	0	0	0	0	0	0	0	0	12	0	0	0	0	0	0	0	0	0
ASV_1779	0	0	0	0	0	0	0	0	0	0	0	0	0	0	0	12	0	0	0	0	0	0	0	0	0
ASV_1780	0	0	0	0	0	0	0	0	0	0	0	0	0	0	0	12	0	0	0	0	0	0	0	0	0
ASV_1781	0	0	0	0	0	0	0	0	0	0	0	0	0	0	0	12	0	0	0	0	0	0	0	0	0
ASV_1782	0	0	0	0	0	0	0	0	0	0	0	0	0	0	0	12	0	0	0	0	0	0	0	0	0
ASV_1783	0	0	0	0	0	0	0	0	0	0	0	0	0	0	0	12	0	0	0	0	0	0	0	0	0
ASV_1784	0	0	0	0	0	0	0	0	0	0	0	0	0	0	0	12	0	0	0	0	0	0	0	0	0
ASV_1785	0	0	0	0	0	0	0	0	0	0	0	0	0	0	0	12	0	0	0	0	0	0	0	0	0
ASV_1786	0	0	0	0	0	0	0	0	0	0	0	0	0	0	0	12	0	0	0	0	0	0	0	0	0
ASV_1787	0	0	0	0	0	0	0	0	0	0	0	0	0	0	0	12	0	0	0	0	0	0	0	0	0
ASV_1788	0	0	0	0	0	0	0	0	0	0	0	0	0	0	0	12	0	0	0	0	0	0	0	0	0
ASV_1789	0	0	0	0	0	0	0	0	0	0	0	0	0	0	0	12	0	0	0	0	0	0	0	0	0
ASV_1790	0	0	0	0	0	0	0	0	0	0	0	0	0	0	0	12	0	0	0	0	0	0	0	0	0
ASV_1791	0	0	0	0	0	0	0	0	0	0	0	0	0	0	0	0	12	0	0	0	0	0	0	0	0
ASV_1792	0	0	0	0	0	0	0	0	0	0	0	0	0	0	0	0	12	0	0	0	0	0	0	0	0
ASV_1793	0	0	0	0	0	0	0	0	0	0	0	0	0	0	0	0	12	0	0	0	0	0	0	0	0
ASV_1794	0	0	0	0	0	0	0	0	0	0	0	0	0	0	0	0	12	0	0	0	0	0	0	0	0
ASV_1795	0	0	0	0	0	0	0	0	0	0	0	0	0	0	0	0	12	0	0	0	0	0	0	0	0
ASV_1796	0	0	0	0	0	0	0	0	0	0	0	0	0	0	0	0	12	0	0	0	0	0	0	0	0
ASV_1797	0	0	0	0	0	0	0	0	0	0	0	0	0	0	0	0	12	0	0	0	0	0	0	0	0
ASV_1798	0	0	0	0	0	0	0	0	0	0	0	0	0	0	0	0	4	0	8	0	0	0	0	0	0
ASV_1799	0	0	0	0	0	0	0	0	0	0	0	0	0	0	0	0	0	12	0	0	0	0	0	0	0
ASV_1800	0	0	0	0	0	0	0	0	0	0	0	0	0	0	0	0	0	12	0	0	0	0	0	0	0
ASV_1801	0	0	0	0	0	0	0	0	0	0	0	0	0	0	0	0	0	12	0	0	0	0	0	0	0
ASV_1802	0	0	0	0	0	0	0	0	0	0	0	0	0	0	0	0	0	12	0	0	0	0	0	0	0
ASV_1803	0	0	0	0	0	0	0	0	0	0	0	0	0	0	0	0	0	0	12	0	0	0	0	0	0
ASV_1804	0	0	0	0	0	0	0	0	0	0	0	0	0	0	0	0	0	0	12	0	0	0	0	0	0
ASV_1805	0	0	0	0	0	0	0	0	0	0	0	0	0	0	0	0	0	0	12	0	0	0	0	0	0
ASV_1806	0	0	0	0	0	0	0	0	0	0	0	0	0	0	0	0	0	0	12	0	0	0	0	0	0
ASV_1807	0	0	0	0	0	0	0	0	0	0	0	0	0	0	0	0	0	0	12	0	0	0	0	0	0
ASV_1808	0	0	0	0	0	0	0	0	0	0	0	0	0	0	0	0	0	0	12	0	0	0	0	0	0
ASV_1809	0	0	0	0	0	0	0	0	0	0	0	0	0	0	0	0	0	0	12	0	0	0	0	0	0
ASV_1810	0	0	0	0	0	0	0	0	0	0	0	0	0	0	0	0	0	0	12	0	0	0	0	0	0
ASV_1811	0	0	0	0	0	0	0	0	0	0	0	0	0	0	0	0	0	0	12	0	0	0	0	0	0
ASV_1812	0	0	0	0	0	0	0	0	0	0	0	0	0	0	0	0	0	0	12	0	0	0	0	0	0
ASV_1813	0	0	0	0	0	0	0	0	0	0	0	0	0	0	0	0	0	0	12	0	0	0	0	0	0
ASV_1814	0	0	0	0	0	0	0	0	0	0	0	0	0	0	0	0	0	0	12	0	0	0	0	0	0
ASV_1815	0	0	0	0	0	0	0	0	0	0	0	0	0	0	0	0	0	0	12	0	0	0	0	0	0
ASV_1816	0	0	0	0	0	0	0	0	0	0	0	0	0	0	0	0	0	0	12	0	0	0	0	0	0
ASV_1817	0	0	0	0	0	0	0	0	0	0	0	0	0	0	0	0	0	0	12	0	0	0	0	0	0
ASV_1818	0	0	0	0	0	0	0	0	0	0	0	0	0	0	0	0	0	0	12	0	0	0	0	0	0
ASV_1819	0	0	0	0	0	0	0	0	0	0	0	0	0	0	0	0	0	0	6	0	0	0	0	0	6
ASV_1820	0	0	0	0	0	0	0	0	0	0	0	0	0	0	0	0	0	0	0	12	0	0	0	0	0
ASV_1821	0	0	0	0	0	0	0	0	0	0	0	0	0	0	0	0	0	0	0	12	0	0	0	0	0
ASV_1822	0	0	0	0	0	0	0	0	0	0	0	0	0	0	0	0	0	0	0	12	0	0	0	0	0
ASV_1823	0	0	0	0	0	0	0	0	0	0	0	0	0	0	0	0	0	0	0	12	0	0	0	0	0
ASV_1824	0	0	0	0	0	0	0	0	0	0	0	0	0	0	0	0	0	0	0	12	0	0	0	0	0
ASV_1825	0	0	0	0	0	0	0	0	0	0	0	0	0	0	0	0	0	0	0	12	0	0	0	0	0
ASV_1826	0	0	0	0	0	0	0	0	0	0	0	0	0	0	0	0	0	0	0	12	0	0	0	0	0
ASV_1827	0	0	0	0	0	0	0	0	0	0	0	0	0	0	0	0	0	0	0	12	0	0	0	0	0
ASV_1828	0	0	0	0	0	0	0	0	0	0	0	0	0	0	0	0	0	0	0	12	0	0	0	0	0
ASV_1829	0	0	0	0	0	0	0	0	0	0	0	0	0	0	0	0	0	0	0	12	0	0	0	0	0
ASV_1830	0	0	0	0	0	0	0	0	0	0	0	0	0	0	0	0	0	0	0	12	0	0	0	0	0
ASV_1831	0	0	0	0	0	0	0	0	0	0	0	0	0	0	0	0	0	0	0	12	0	0	0	0	0
ASV_1832	0	0	0	0	0	0	0	0	0	0	0	0	0	0	0	0	0	0	0	12	0	0	0	0	0
ASV_1833	0	0	0	0	0	0	0	0	0	0	0	0	0	0	0	0	0	0	0	12	0	0	0	0	0
ASV_1834	0	0	0	0	0	0	0	0	0	0	0	0	0	0	0	0	0	0	0	12	0	0	0	0	0
ASV_1835	0	0	0	0	0	0	0	0	0	0	0	0	0	0	0	0	0	0	0	12	0	0	0	0	0
ASV_1836	0	0	0	0	0	0	0	0	0	0	0	0	0	0	0	0	0	0	0	12	0	0	0	0	0
ASV_1837	0	0	0	0	0	0	0	0	0	0	0	0	0	0	0	0	0	0	0	12	0	0	0	0	0
ASV_1838	0	0	0	0	0	0	0	0	0	0	0	0	0	0	0	0	0	0	0	12	0	0	0	0	0
ASV_1839	0	0	0	0	0	0	0	0	0	0	0	0	0	0	0	0	0	0	0	0	12	0	0	0	0
ASV_1840	0	0	0	0	0	0	0	0	0	0	0	0	0	0	0	0	0	0	0	0	12	0	0	0	0
ASV_1841	0	0	0	0	0	0	0	0	0	0	0	0	0	0	0	0	0	0	0	0	12	0	0	0	0
ASV_1842	0	0	0	0	0	0	0	0	0	0	0	0	0	0	0	0	0	0	0	0	12	0	0	0	0
ASV_1843	0	0	0	0	0	0	0	0	0	0	0	0	0	0	0	0	0	0	0	0	12	0	0	0	0
ASV_1844	0	0	0	0	0	0	0	0	0	0	0	0	0	0	0	0	0	0	0	0	12	0	0	0	0
ASV_1845	0	0	0	0	0	0	0	0	0	0	0	0	0	0	0	0	0	0	0	0	12	0	0	0	0
ASV_1846	0	0	0	0	0	0	0	0	0	0	0	0	0	0	0	0	0	0	0	0	12	0	0	0	0
ASV_1847	0	0	0	0	0	0	0	0	0	0	0	0	0	0	0	0	0	0	0	0	12	0	0	0	0
ASV_1848	0	0	0	0	0	0	0	0	0	0	0	0	0	0	0	0	0	0	0	0	12	0	0	0	0
ASV_1849	0	0	0	0	0	0	0	0	0	0	0	0	0	0	0	0	0	0	0	0	12	0	0	0	0
ASV_1850	0	0	0	0	0	0	0	0	0	0	0	0	0	0	0	0	0	0	0	0	12	0	0	0	0
ASV_1851	0	0	0	0	0	0	0	0	0	0	0	0	0	0	0	0	0	0	0	0	0	12	0	0	0
ASV_1852	0	0	0	0	0	0	0	0	0	0	0	0	0	0	0	0	0	0	0	0	0	12	0	0	0
ASV_1853	0	0	0	0	0	0	0	0	0	0	0	0	0	0	0	0	0	0	0	0	0	12	0	0	0
ASV_1854	0	0	0	0	0	0	0	0	0	0	0	0	0	0	0	0	0	0	0	0	0	12	0	0	0
ASV_1855	0	0	0	0	0	0	0	0	0	0	0	0	0	0	0	0	0	0	0	0	0	12	0	0	0
ASV_1856	0	0	0	0	0	0	0	0	0	0	0	0	0	0	0	0	0	0	0	0	0	12	0	0	0
ASV_1857	0	0	0	0	0	0	0	0	0	0	0	0	0	0	0	0	0	0	0	0	0	12	0	0	0
ASV_1858	0	0	0	0	0	0	0	0	0	0	0	0	0	0	0	0	0	0	0	0	0	12	0	0	0
ASV_1859	0	0	0	0	0	0	0	0	0	0	0	0	0	0	0	0	0	0	0	0	0	0	0	12	0
ASV_1860	0	0	0	0	0	0	0	0	0	0	0	0	0	0	0	0	0	0	0	0	0	0	0	12	0
ASV_1861	0	0	0	0	0	0	0	0	0	0	0	0	0	0	0	0	0	0	0	0	0	0	0	12	0
ASV_1862	0	0	0	0	0	0	0	0	0	0	0	0	0	0	0	0	0	0	0	0	0	0	0	12	0
ASV_1863	0	0	0	0	0	0	0	0	0	0	0	0	0	0	0	0	0	0	0	0	0	0	0	12	0
ASV_1864	0	0	0	0	0	0	0	0	0	0	0	0	0	0	0	0	0	0	0	0	0	0	0	12	0
ASV_1865	0	0	0	0	0	0	0	0	0	0	0	0	0	0	0	0	0	0	0	0	0	0	0	0	12
ASV_1866	0	0	0	0	0	0	0	0	0	0	0	0	0	0	0	0	0	0	0	0	0	0	0	0	12
ASV_1867	0	0	0	0	0	0	0	0	0	0	0	0	0	0	0	0	0	0	0	0	0	0	0	0	12
ASV_1868	11	0	0	0	0	0	0	0	0	0	0	0	0	0	0	0	0	0	0	0	0	0	0	0	0
ASV_1869	11	0	0	0	0	0	0	0	0	0	0	0	0	0	0	0	0	0	0	0	0	0	0	0	0
ASV_1870	4	0	0	0	0	1	0	0	0	2	0	0	0	0	4	0	0	0	0	0	0	0	0	0	0
ASV_1871	1	0	0	0	3	2	0	0	2	0	0	1	2	0	0	0	0	0	0	0	0	0	0	0	0
ASV_1872	0	11	0	0	0	0	0	0	0	0	0	0	0	0	0	0	0	0	0	0	0	0	0	0	0
ASV_1873	0	2	0	2	2	3	0	2	0	0	0	0	0	0	0	0	0	0	0	0	0	0	0	0	0
ASV_1874	0	2	0	1	7	0	0	0	0	1	0	0	0	0	0	0	0	0	0	0	0	0	0	0	0
ASV_1875	0	2	0	0	1	0	0	4	0	1	0	0	0	0	3	0	0	0	0	0	0	0	0	0	0
ASV_1876	0	0	11	0	0	0	0	0	0	0	0	0	0	0	0	0	0	0	0	0	0	0	0	0	0
ASV_1877	0	0	11	0	0	0	0	0	0	0	0	0	0	0	0	0	0	0	0	0	0	0	0	0	0
ASV_1878	0	0	5	6	0	0	0	0	0	0	0	0	0	0	0	0	0	0	0	0	0	0	0	0	0
ASV_1879	0	0	3	0	0	0	0	0	0	0	0	0	0	0	0	0	0	0	0	0	8	0	0	0	0
ASV_1880	0	0	0	3	4	1	0	0	2	1	0	0	0	0	0	0	0	0	0	0	0	0	0	0	0
ASV_1881	0	0	0	0	11	0	0	0	0	0	0	0	0	0	0	0	0	0	0	0	0	0	0	0	0
ASV_1882	0	0	0	0	11	0	0	0	0	0	0	0	0	0	0	0	0	0	0	0	0	0	0	0	0
ASV_1883	0	0	0	0	0	0	4	0	0	0	0	0	0	3	4	0	0	0	0	0	0	0	0	0	0
ASV_1884	0	0	0	0	0	0	4	0	0	0	0	0	0	0	0	0	7	0	0	0	0	0	0	0	0
ASV_1885	0	0	0	0	0	0	0	11	0	0	0	0	0	0	0	0	0	0	0	0	0	0	0	0	0
ASV_1886	0	0	0	0	0	0	0	0	11	0	0	0	0	0	0	0	0	0	0	0	0	0	0	0	0
ASV_1887	0	0	0	0	0	0	0	0	11	0	0	0	0	0	0	0	0	0	0	0	0	0	0	0	0
ASV_1888	0	0	0	0	0	0	0	0	7	0	0	0	0	0	0	0	0	0	4	0	0	0	0	0	0
ASV_1889	0	0	0	0	0	0	0	0	0	11	0	0	0	0	0	0	0	0	0	0	0	0	0	0	0
ASV_1890	0	0	0	0	0	0	0	0	0	11	0	0	0	0	0	0	0	0	0	0	0	0	0	0	0
ASV_1891	0	0	0	0	0	0	0	0	0	11	0	0	0	0	0	0	0	0	0	0	0	0	0	0	0
ASV_1892	0	0	0	0	0	0	0	0	0	11	0	0	0	0	0	0	0	0	0	0	0	0	0	0	0
ASV_1893	0	0	0	0	0	0	0	0	0	0	11	0	0	0	0	0	0	0	0	0	0	0	0	0	0
ASV_1894	0	0	0	0	0	0	0	0	0	0	4	5	1	0	1	0	0	0	0	0	0	0	0	0	0
ASV_1895	0	0	0	0	0	0	0	0	0	0	0	11	0	0	0	0	0	0	0	0	0	0	0	0	0
ASV_1896	0	0	0	0	0	0	0	0	0	0	0	0	11	0	0	0	0	0	0	0	0	0	0	0	0
ASV_1897	0	0	0	0	0	0	0	0	0	0	0	0	11	0	0	0	0	0	0	0	0	0	0	0	0
ASV_1898	0	0	0	0	0	0	0	0	0	0	0	0	0	11	0	0	0	0	0	0	0	0	0	0	0
ASV_1899	0	0	0	0	0	0	0	0	0	0	0	0	0	8	0	0	3	0	0	0	0	0	0	0	0
ASV_1900	0	0	0	0	0	0	0	0	0	0	0	0	0	6	0	0	0	5	0	0	0	0	0	0	0
ASV_1901	0	0	0	0	0	0	0	0	0	0	0	0	0	0	11	0	0	0	0	0	0	0	0	0	0
ASV_1902	0	0	0	0	0	0	0	0	0	0	0	0	0	0	11	0	0	0	0	0	0	0	0	0	0
ASV_1903	0	0	0	0	0	0	0	0	0	0	0	0	0	0	0	11	0	0	0	0	0	0	0	0	0
ASV_1904	0	0	0	0	0	0	0	0	0	0	0	0	0	0	0	11	0	0	0	0	0	0	0	0	0
ASV_1905	0	0	0	0	0	0	0	0	0	0	0	0	0	0	0	11	0	0	0	0	0	0	0	0	0
ASV_1906	0	0	0	0	0	0	0	0	0	0	0	0	0	0	0	11	0	0	0	0	0	0	0	0	0
ASV_1907	0	0	0	0	0	0	0	0	0	0	0	0	0	0	0	11	0	0	0	0	0	0	0	0	0
ASV_1908	0	0	0	0	0	0	0	0	0	0	0	0	0	0	0	11	0	0	0	0	0	0	0	0	0
ASV_1909	0	0	0	0	0	0	0	0	0	0	0	0	0	0	0	11	0	0	0	0	0	0	0	0	0
ASV_1910	0	0	0	0	0	0	0	0	0	0	0	0	0	0	0	11	0	0	0	0	0	0	0	0	0
ASV_1911	0	0	0	0	0	0	0	0	0	0	0	0	0	0	0	11	0	0	0	0	0	0	0	0	0
ASV_1912	0	0	0	0	0	0	0	0	0	0	0	0	0	0	0	11	0	0	0	0	0	0	0	0	0
ASV_1913	0	0	0	0	0	0	0	0	0	0	0	0	0	0	0	11	0	0	0	0	0	0	0	0	0
ASV_1914	0	0	0	0	0	0	0	0	0	0	0	0	0	0	0	11	0	0	0	0	0	0	0	0	0
ASV_1915	0	0	0	0	0	0	0	0	0	0	0	0	0	0	0	11	0	0	0	0	0	0	0	0	0
ASV_1916	0	0	0	0	0	0	0	0	0	0	0	0	0	0	0	11	0	0	0	0	0	0	0	0	0
ASV_1917	0	0	0	0	0	0	0	0	0	0	0	0	0	0	0	11	0	0	0	0	0	0	0	0	0
ASV_1918	0	0	0	0	0	0	0	0	0	0	0	0	0	0	0	11	0	0	0	0	0	0	0	0	0
ASV_1919	0	0	0	0	0	0	0	0	0	0	0	0	0	0	0	11	0	0	0	0	0	0	0	0	0
ASV_1920	0	0	0	0	0	0	0	0	0	0	0	0	0	0	0	11	0	0	0	0	0	0	0	0	0
ASV_1921	0	0	0	0	0	0	0	0	0	0	0	0	0	0	0	11	0	0	0	0	0	0	0	0	0
ASV_1922	0	0	0	0	0	0	0	0	0	0	0	0	0	0	0	11	0	0	0	0	0	0	0	0	0
ASV_1923	0	0	0	0	0	0	0	0	0	0	0	0	0	0	0	11	0	0	0	0	0	0	0	0	0
ASV_1924	0	0	0	0	0	0	0	0	0	0	0	0	0	0	0	0	11	0	0	0	0	0	0	0	0
ASV_1925	0	0	0	0	0	0	0	0	0	0	0	0	0	0	0	0	11	0	0	0	0	0	0	0	0
ASV_1926	0	0	0	0	0	0	0	0	0	0	0	0	0	0	0	0	11	0	0	0	0	0	0	0	0
ASV_1927	0	0	0	0	0	0	0	0	0	0	0	0	0	0	0	0	11	0	0	0	0	0	0	0	0
ASV_1928	0	0	0	0	0	0	0	0	0	0	0	0	0	0	0	0	11	0	0	0	0	0	0	0	0
ASV_1929	0	0	0	0	0	0	0	0	0	0	0	0	0	0	0	0	11	0	0	0	0	0	0	0	0
ASV_1930	0	0	0	0	0	0	0	0	0	0	0	0	0	0	0	0	11	0	0	0	0	0	0	0	0
ASV_1931	0	0	0	0	0	0	0	0	0	0	0	0	0	0	0	0	11	0	0	0	0	0	0	0	0
ASV_1932	0	0	0	0	0	0	0	0	0	0	0	0	0	0	0	0	11	0	0	0	0	0	0	0	0
ASV_1933	0	0	0	0	0	0	0	0	0	0	0	0	0	0	0	0	11	0	0	0	0	0	0	0	0
ASV_1934	0	0	0	0	0	0	0	0	0	0	0	0	0	0	0	0	11	0	0	0	0	0	0	0	0
ASV_1935	0	0	0	0	0	0	0	0	0	0	0	0	0	0	0	0	6	0	0	0	5	0	0	0	0
ASV_1936	0	0	0	0	0	0	0	0	0	0	0	0	0	0	0	0	0	11	0	0	0	0	0	0	0
ASV_1937	0	0	0	0	0	0	0	0	0	0	0	0	0	0	0	0	0	11	0	0	0	0	0	0	0
ASV_1938	0	0	0	0	0	0	0	0	0	0	0	0	0	0	0	0	0	11	0	0	0	0	0	0	0
ASV_1939	0	0	0	0	0	0	0	0	0	0	0	0	0	0	0	0	0	11	0	0	0	0	0	0	0
ASV_1940	0	0	0	0	0	0	0	0	0	0	0	0	0	0	0	0	0	0	11	0	0	0	0	0	0
ASV_1941	0	0	0	0	0	0	0	0	0	0	0	0	0	0	0	0	0	0	11	0	0	0	0	0	0
ASV_1942	0	0	0	0	0	0	0	0	0	0	0	0	0	0	0	0	0	0	11	0	0	0	0	0	0
ASV_1943	0	0	0	0	0	0	0	0	0	0	0	0	0	0	0	0	0	0	11	0	0	0	0	0	0
ASV_1944	0	0	0	0	0	0	0	0	0	0	0	0	0	0	0	0	0	0	11	0	0	0	0	0	0
ASV_1945	0	0	0	0	0	0	0	0	0	0	0	0	0	0	0	0	0	0	11	0	0	0	0	0	0
ASV_1946	0	0	0	0	0	0	0	0	0	0	0	0	0	0	0	0	0	0	11	0	0	0	0	0	0
ASV_1947	0	0	0	0	0	0	0	0	0	0	0	0	0	0	0	0	0	0	11	0	0	0	0	0	0
ASV_1948	0	0	0	0	0	0	0	0	0	0	0	0	0	0	0	0	0	0	11	0	0	0	0	0	0
ASV_1949	0	0	0	0	0	0	0	0	0	0	0	0	0	0	0	0	0	0	11	0	0	0	0	0	0
ASV_1950	0	0	0	0	0	0	0	0	0	0	0	0	0	0	0	0	0	0	11	0	0	0	0	0	0
ASV_1951	0	0	0	0	0	0	0	0	0	0	0	0	0	0	0	0	0	0	11	0	0	0	0	0	0
ASV_1952	0	0	0	0	0	0	0	0	0	0	0	0	0	0	0	0	0	0	11	0	0	0	0	0	0
ASV_1953	0	0	0	0	0	0	0	0	0	0	0	0	0	0	0	0	0	0	11	0	0	0	0	0	0
ASV_1954	0	0	0	0	0	0	0	0	0	0	0	0	0	0	0	0	0	0	11	0	0	0	0	0	0
ASV_1955	0	0	0	0	0	0	0	0	0	0	0	0	0	0	0	0	0	0	11	0	0	0	0	0	0
ASV_1956	0	0	0	0	0	0	0	0	0	0	0	0	0	0	0	0	0	0	11	0	0	0	0	0	0
ASV_1957	0	0	0	0	0	0	0	0	0	0	0	0	0	0	0	0	0	0	11	0	0	0	0	0	0
ASV_1958	0	0	0	0	0	0	0	0	0	0	0	0	0	0	0	0	0	0	11	0	0	0	0	0	0
ASV_1959	0	0	0	0	0	0	0	0	0	0	0	0	0	0	0	0	0	0	11	0	0	0	0	0	0
ASV_1960	0	0	0	0	0	0	0	0	0	0	0	0	0	0	0	0	0	0	11	0	0	0	0	0	0
ASV_1961	0	0	0	0	0	0	0	0	0	0	0	0	0	0	0	0	0	0	11	0	0	0	0	0	0
ASV_1962	0	0	0	0	0	0	0	0	0	0	0	0	0	0	0	0	0	0	7	0	4	0	0	0	0
ASV_1963	0	0	0	0	0	0	0	0	0	0	0	0	0	0	0	0	0	0	0	11	0	0	0	0	0
ASV_1964	0	0	0	0	0	0	0	0	0	0	0	0	0	0	0	0	0	0	0	11	0	0	0	0	0
ASV_1965	0	0	0	0	0	0	0	0	0	0	0	0	0	0	0	0	0	0	0	11	0	0	0	0	0
ASV_1966	0	0	0	0	0	0	0	0	0	0	0	0	0	0	0	0	0	0	0	11	0	0	0	0	0
ASV_1967	0	0	0	0	0	0	0	0	0	0	0	0	0	0	0	0	0	0	0	11	0	0	0	0	0
ASV_1968	0	0	0	0	0	0	0	0	0	0	0	0	0	0	0	0	0	0	0	11	0	0	0	0	0
ASV_1969	0	0	0	0	0	0	0	0	0	0	0	0	0	0	0	0	0	0	0	11	0	0	0	0	0
ASV_1970	0	0	0	0	0	0	0	0	0	0	0	0	0	0	0	0	0	0	0	11	0	0	0	0	0
ASV_1971	0	0	0	0	0	0	0	0	0	0	0	0	0	0	0	0	0	0	0	11	0	0	0	0	0
ASV_1972	0	0	0	0	0	0	0	0	0	0	0	0	0	0	0	0	0	0	0	11	0	0	0	0	0
ASV_1973	0	0	0	0	0	0	0	0	0	0	0	0	0	0	0	0	0	0	0	11	0	0	0	0	0
ASV_1974	0	0	0	0	0	0	0	0	0	0	0	0	0	0	0	0	0	0	0	11	0	0	0	0	0
ASV_1975	0	0	0	0	0	0	0	0	0	0	0	0	0	0	0	0	0	0	0	11	0	0	0	0	0
ASV_1976	0	0	0	0	0	0	0	0	0	0	0	0	0	0	0	0	0	0	0	11	0	0	0	0	0
ASV_1977	0	0	0	0	0	0	0	0	0	0	0	0	0	0	0	0	0	0	0	11	0	0	0	0	0
ASV_1978	0	0	0	0	0	0	0	0	0	0	0	0	0	0	0	0	0	0	0	11	0	0	0	0	0
ASV_1979	0	0	0	0	0	0	0	0	0	0	0	0	0	0	0	0	0	0	0	0	11	0	0	0	0
ASV_1980	0	0	0	0	0	0	0	0	0	0	0	0	0	0	0	0	0	0	0	0	11	0	0	0	0
ASV_1981	0	0	0	0	0	0	0	0	0	0	0	0	0	0	0	0	0	0	0	0	11	0	0	0	0
ASV_1982	0	0	0	0	0	0	0	0	0	0	0	0	0	0	0	0	0	0	0	0	11	0	0	0	0
ASV_1983	0	0	0	0	0	0	0	0	0	0	0	0	0	0	0	0	0	0	0	0	11	0	0	0	0
ASV_1984	0	0	0	0	0	0	0	0	0	0	0	0	0	0	0	0	0	0	0	0	11	0	0	0	0
ASV_1985	0	0	0	0	0	0	0	0	0	0	0	0	0	0	0	0	0	0	0	0	11	0	0	0	0
ASV_1986	0	0	0	0	0	0	0	0	0	0	0	0	0	0	0	0	0	0	0	0	11	0	0	0	0
ASV_1987	0	0	0	0	0	0	0	0	0	0	0	0	0	0	0	0	0	0	0	0	11	0	0	0	0
ASV_1988	0	0	0	0	0	0	0	0	0	0	0	0	0	0	0	0	0	0	0	0	0	11	0	0	0
ASV_1989	0	0	0	0	0	0	0	0	0	0	0	0	0	0	0	0	0	0	0	0	0	11	0	0	0
ASV_1990	0	0	0	0	0	0	0	0	0	0	0	0	0	0	0	0	0	0	0	0	0	11	0	0	0
ASV_1991	0	0	0	0	0	0	0	0	0	0	0	0	0	0	0	0	0	0	0	0	0	11	0	0	0
ASV_1992	0	0	0	0	0	0	0	0	0	0	0	0	0	0	0	0	0	0	0	0	0	11	0	0	0
ASV_1993	0	0	0	0	0	0	0	0	0	0	0	0	0	0	0	0	0	0	0	0	0	11	0	0	0
ASV_1994	0	0	0	0	0	0	0	0	0	0	0	0	0	0	0	0	0	0	0	0	0	0	0	11	0
ASV_1995	0	0	0	0	0	0	0	0	0	0	0	0	0	0	0	0	0	0	0	0	0	0	0	11	0
ASV_1996	0	0	0	0	0	0	0	0	0	0	0	0	0	0	0	0	0	0	0	0	0	0	0	11	0
ASV_1997	0	0	0	0	0	0	0	0	0	0	0	0	0	0	0	0	0	0	0	0	0	0	0	11	0
ASV_1998	0	0	0	0	0	0	0	0	0	0	0	0	0	0	0	0	0	0	0	0	0	0	0	11	0
[truncated: 2,179 more rows]
